# Supplementary material for: Reaction of trisubstituted alkenes with iron porphyrin carbenes: facile synthesis of tetrasubstituted dienes and cyclopentadienes
Source: Royal Society of Chemistry journal article supplement (doi:10.1039/c3cc44092c), 2013-01-01

# Support Information

## *Reaction of Trisubstituted Alkenes with Iron Porphyrin Carbenes: Facile Synthesis of Tetrasubstituted Dienes and Cyclopentadienes*

*Peng Wang, Saihu Liao, Sunewang R. Wang, Run-Duo Gao, Yong Tang\**

State Key Laboratory of Organometallic Chemistry, Shanghai Institute of Organic Chemistry, Chinese Academy of Sciences, 354 Fenglin Lu, Shanghai 200032, China

E-mail: [tangy@sioc.ac.cn](mailto:tangy@sioc.ac.cn)

|                                                                             |            |
|-----------------------------------------------------------------------------|------------|
| <b>1. General Information.....</b>                                          | <b>S2</b>  |
| <b>2. General Procedures for the Substituent Effect.....</b>                | <b>S3</b>  |
| <b>3. Reaction Conditions for Synthesis of Tetrasubstituted Dienes.....</b> | <b>S6</b>  |
| <b>4. General Procedure for Synthesis of Tetrasubstituted Dienes.....</b>   | <b>S7</b>  |
| <b>5. Reaction Conditions for Synthesis of Cyclopentadienes.....</b>        | <b>S15</b> |
| <b>6. General Procedure for Synthesis of Cyclopentadienes.....</b>          | <b>S17</b> |
| <b>7. Procedure for Chemical Transformation.....</b>                        | <b>S23</b> |
| <b>8. Procedure for Deuterium Experiment.....</b>                           | <b>S24</b> |
| <b>9. NMR Spectra of the Compounds.....</b>                                 | <b>S27</b> |

**General Information** All reactions were carried out under N<sub>2</sub> unless otherwise noted. All carbonyl compounds and solvents were purified according to standard methods unless otherwise noted.

<sup>1</sup>H NMR spectra were recorded on a VARIAN Mercury 300 MHz or VARIAN Mercury 400 MHz spectrometer in chloroform-d. All signals are reported in ppm with the internal TMS signal at 0.0 ppm or chloroform signal at 7.26 ppm as a standard. The data are reported as (s = singlet, d = doublet, t = triplet, q = quadruplet, m = multiplet or unresolved, coupling constant(s) in Hz, integration). <sup>13</sup>C NMR spectra were recorded on a VARIAN Mercury 75.5 MHz spectrometer in chloroform-d. All signals are reported in ppm with the internal chloroform signal at 77.0 ppm as a standard. IR spectra were recorded on a Perkin–Elmer 983, Digital FT–IR spectrometer or Bruker–Tensor 27; frequencies are given in reciprocal centimeters (cm<sup>-1</sup>) and only selected absorbance is reported; Mass spectra were determined on an Agilent 5973N MSD (EI) and Shimadzu LCMS-2010EV (ESI) mass spectrometer or Agilent G6100 LC/MSD (ESI) single Quand mass spectrometer. High resolution mass spectra were recorded on Waters Micromass GCT Premier (EI) and Bruker Daltonics, Inc. APEXIII 7.0 TESLA FTMS (ESI) mass spectrometers.

Fe(TCP)Cl was synthesized according to literature procedure.<sup>1</sup>

## 2. General Procedures for the Substituent Effect

To a stirred suspension of phosphonium salt **1** (0.5 mmol) in dry PhCH<sub>3</sub> (2.0 mL) under N<sub>2</sub> at room temperature was added LiHMDS (0.6 mL, 1.0 M in THF, 0.6 mmol) in one portion. 10 minutes later, Fe(TCP)Cl (1.7 mg, 0.002 mmol) and MDA (50 μL, 0.6 mmol) were added to the system respectively (Caution! N<sub>2</sub> Release!), then washed the Schlenk tube with dry PhCH<sub>3</sub> (1.0 mL), and the mixture stirred at room temperature for another 10 minutes. PCBA (56.0 mg, 0.4 mmol) and PhCH<sub>3</sub> (1.0 mL) were added and the resulting mixture was stirred at room temperature. After the reaction was complete, the resulting mixture was filtered rapidly through a funnel with a thin layer of silica gel and eluted with DCM. The filtrate was concentrated and analyzed by <sup>1</sup>H NMR, and then the residue was purified by chromatography on silica gel to afford the desired products.

For **1a** and **1b**, No desired products were formed.

For **1c**, desired product **3a** was isolated in 13% yield, 3E,5E/3E,5Z = 69/31.

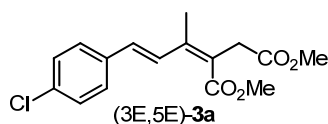

(3E, 5E)-**3a**, white solid, <sup>1</sup>H NMR (CDCl<sub>3</sub>, 400 MHz) δ 8.03 (d, *J* = 16.0 Hz, 1H), 7.41 (d, *J* = 8.8 Hz, 2H), 7.30 (d, *J* = 8.4 Hz, 2H), 6.82 (d, *J* = 16.0 Hz, 1H), 3.80 (s, 3H), 3.70 (s, 3H), 3.55 (s, 2H), 2.09 (s, 3H); <sup>13</sup>C NMR (CDCl<sub>3</sub>, 100 MHz) δ 171.2, 167.9, 145.5, 135.6, 133.9, 132.3, 128.8, 128.6, 128.3, 123.1, 52.1, 51.9, 36.1, 16.2; IR (neat) ν 2951 (m), 2847 (m), 1736 (s), 1706 (s), 1489 (m), 1433 (m), 1191 (s), 1166 (m), 965 (m), 812 (s); MS (EI, *m/z*, rel. intensity) 308 (52, M<sup>+</sup>), 293 (2.5), 277 (12), 248 (13), 235 (15), 217 (24), 203 (57), 189 (60), 171 (9.7), 153 (31), 127 (32), 113 (33), 99 (31), 84 (57), 71 (68), 57 (100), 43 (60), 41 (24); HRMS (EI) calcd for C<sub>16</sub>H<sub>17</sub>ClO<sub>4</sub> (M<sup>+</sup>): 308.0815; Found: 308.0811.

For **1d**, desired product **4a** was isolated in 49% yield, 3E,5E/3E,5Z = 83/17, the direct Wittig reaction of phosphonium salt **1d** was also observed.

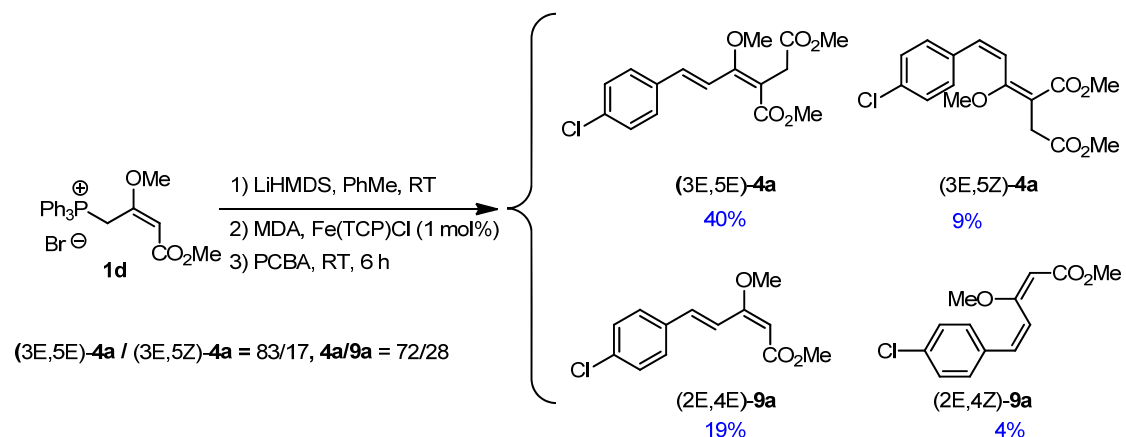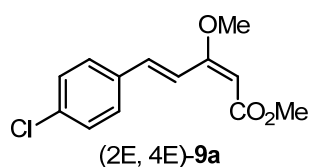

19% yield, white solid,  $^1\text{H}$  NMR ( $\text{CDCl}_3$ , 400 MHz)  $\delta$  8.07 (d,  $J = 16.0$  Hz, 1H), 7.46 (dt,  $J = 2.2, 8.8$  Hz, 2H), 7.30 (dt,  $J = 2.2, 8.4$  Hz, 2H), 7.22 (d,  $J = 16.0$  Hz, 1H), 5.16 (s, 1H), 3.74 (s, 3H), 3.72 (s, 3H);  $^{13}\text{C}$  NMR ( $\text{CDCl}_3$ , 100 MHz)  $\delta$  167.7, 166.5, 134.6, 134.5, 133.8, 128.8, 128.7, 120.6, 92.1, 55.4, 50.9; IR (neat)  $\nu$  2951 (m), 2847 (m), 1703 (s), 1639 (m), 1583 (s), 1566 (m), 1490 (m), 1433 (m), 1145 (s), 970 (s); MS (EI, m/z, rel. intensity) 252 (28,  $\text{M}^+$ ), 221 (17), 192 (100), 178 (20), 158 (61), 149 (14), 127 (22), 115 (36), 101 (17), 89 (5.5), 75 (12), 59 (13); HRMS (EI) calcd for  $\text{C}_{13}\text{H}_{13}\text{ClO}_3$  ( $\text{M}^+$ ): 252.0553; Found: 252.0556.

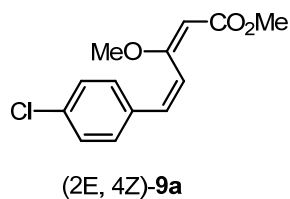

4% yield, White solid,  $^1\text{H}$  NMR ( $\text{CDCl}_3$ , 400 MHz)  $\delta$  7.25 (d,  $J = 8.8$  Hz, 2H), 7.18 (d,  $J = 8.8$  Hz, 2H), 6.95 (d,  $J = 12.8$  Hz, 1H), 6.68 (d,  $J = 12.8$  Hz, 1H), 5.19 (s, 1H), 3.71 (s, 3H), 3.54 (s, 3H).



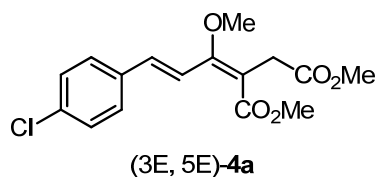

40% yield, colorless liquid, <sup>1</sup>H NMR (CDCl<sub>3</sub>, 400 MHz) δ 7.78 (d, *J* = 16.0 Hz, 1H), 7.45 (d, *J* = 8.0 Hz, 2H), 7.32 (d, *J* = 7.2 Hz, 2H), 6.98 (d, *J* = 16.4 Hz, 1H), 3.76 (s, 3H), 3.73 (s, 3H), 3.70 (s, 3H), 3.54 (s, 2H); <sup>13</sup>C NMR (CDCl<sub>3</sub>, 100 MHz) δ 171.8, 167.5, 164.9, 134.5, 134.4, 128.8, 128.5, 121.1, 113.4, 60.5, 51.9, 51.7, 32.6; IR (neat) ν 2954 (m), 1735 (s), 1610 (m), 1589 (m), 1565 (m), 1491 (m), 1436 (m); MS (EI, *m/z*, rel. intensity) 324 (1.2, M<sup>+</sup>), 310 (2.3), 293 (1.8), 279 (2.7), 265 (4.1), 251 (12), 233 (9.6), 219 (36), 205 (14), 165 (100), 137 (20), 102 (24), 75 (8.7), 59 (11); HRMS (EI) calcd for C<sub>16</sub>H<sub>17</sub>ClO<sub>5</sub> (M<sup>+</sup>): 324.0765; Found: 324.0763.

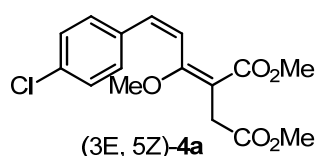

9% yield, colorless liquid, <sup>1</sup>H NMR (CDCl<sub>3</sub>, 400 MHz) δ 7.40-7.38 (m, 2H), 7.29-7.27 (m, 2H), 6.68 (d, *J* = 12.4 Hz, 1H), 6.45 (d, *J* = 12.8 Hz, 1H), 3.72 (s, 3H), 3.68 (s, 3H), 3.48 (s, 2H), 3.46 (s, 3H); <sup>13</sup>C NMR (CDCl<sub>3</sub>, 100 MHz) δ 172.1, 167.5, 164.1, 134.2, 133.0, 130.1, 128.6, 121.7, 106.2, 56.5, 51.8, 51.4, 31.5; IR (neat) ν 2953 (m), 1738 (s), 1587 (m), 1491 (m), 1437 (m); MS (EI, *m/z*, rel. intensity) 324 (0.7, M<sup>+</sup>), 293 (5.1), 265 (10), 251 (31), 233 (26), 219 (100), 205 (38), 165 (9.8), 139 (12), 102 (10), 75 (8.1), 59 (17); HRMS (EI) calcd for C<sub>16</sub>H<sub>17</sub>ClO<sub>5</sub> (M<sup>+</sup>): 324.0765; Found: 324.0773.

### 3. Reaction Conditions for Synthesis of Tetrasubstituted Dienes

**Table S1.** Base and solvent effect on the reaction.

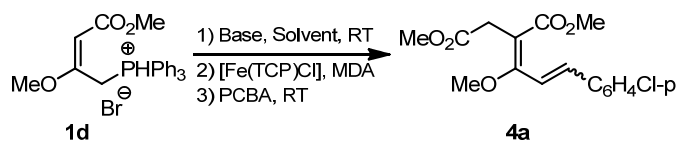

| Entry <sup>a</sup> | Base                           | Solvent                         | 3E, 5E- <b>4a</b> (%) <sup>b</sup> | 3E, 5E/3E, 5Z <sup>c</sup> |
|--------------------|--------------------------------|---------------------------------|------------------------------------|----------------------------|
| 1                  | LiHMDS                         | THF                             | 13                                 | 83/17                      |
| 2                  | NaHMDS                         | THF                             | 39                                 | 97/3                       |
| 3                  | CH <sub>3</sub> ONa            | THF                             | 48                                 | 98/2                       |
| 4                  | K <sub>2</sub> CO <sub>3</sub> | THF                             | 30                                 | 84/16                      |
| 5                  | <i>t</i> -BuOK                 | THF                             | 78                                 | 97/3                       |
| 6                  | <i>t</i> -BuOK                 | DME                             | 85                                 | 98/2                       |
| 7                  | <i>t</i> -BuOK                 | CH <sub>2</sub> Cl <sub>2</sub> | 84                                 | 99/1                       |
| 8                  | <i>t</i> -BuOK                 | PhCH <sub>3</sub>               | 81                                 | 95/5                       |
| 9                  | <i>t</i> -BuOK                 | <i>n</i> -Hexane                | 21                                 | ---                        |
| 10                 | <i>t</i> -BuOK                 | CH <sub>3</sub> CN              | 89                                 | 99/1                       |
| 11 <sup>d</sup>    | <i>t</i> -BuOK                 | CH <sub>3</sub> CN              | 85                                 | 98/2                       |

<sup>a</sup> Phosphonium salt **1d** (235.5 mg, 0.5 mmol), base (0.6 mmol), MDA (50 μL, 0.6 mmol), PCBA (56 mg, 0.4 mmol), Fe(TCP)Cl (1.7 mg, 0.002 mmol), solvent (4.0 mL). <sup>b</sup> Isolated yield of single isomer. <sup>c</sup> Determined by <sup>1</sup>H NMR. <sup>d</sup> Using 0.1 mol% [Fe(TCP)Cl] as catalyst.

#### 4. General Procedure for Synthesis of Tetrasubstituted Dienes

To a stirred suspension of phosphonium salt **1d** (236 mg, 0.5 mmol) in 2.0 mL dry CH<sub>3</sub>CN under N<sub>2</sub> at room temperature was added *t*-BuOK (67.2 mg, 0.60 mmol) in one portion. After 10 min, Fe(TCP)Cl (1.7 mg, 0.002 mmol) and MDA (50 μL, 0.6 mmol) were added to the system respectively (Caution! N<sub>2</sub> Release!), washed the Schlenk tube with 1.0 mL dry CH<sub>3</sub>CN, and the mixture stirred for another 10 min. Aldehyde (0.4 mmol) and CH<sub>3</sub>CN (1.0 mL) were added and the resulting mixture was stirred at room temperature. After the reaction was complete, the resulting mixture was filtered rapidly through a funnel with a thin layer of silica gel and eluted with DCM. The filtrate was concentrated and the residue was purified by chromatography on silica gel to afford the desired products.

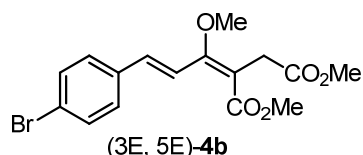

86% yield, white solid, <sup>1</sup>H NMR (CDCl<sub>3</sub>, 300 MHz) δ 7.79 (d, *J* = 16.2 Hz, 1H), 7.48 (d, *J* = 8.4 Hz, 2H), 7.39 (d, *J* = 8.7 Hz, 2H), 6.97 (d, *J* = 15.9 Hz, 1H), 3.77 (s, 3H), 3.74 (s, 3H), 3.71 (s, 3H), 3.53 (s, 2H); <sup>13</sup>C NMR (CDCl<sub>3</sub>, 100 MHz) δ 171.8, 167.5, 164.9, 134.9, 134.5, 131.7, 128.8, 122.8, 121.2, 113.4, 60.5, 51.8, 51.7, 32.5; IR (KBr) ν 2954 (m), 1734 (s), 1609 (m), 1584 (m), 1487 (m), 1438 (m), 1256 (m), 1205 (m), 1170 (m); MS (EI, *m/z*, rel. intensity) 369 (4, M<sup>+</sup>), 337 (12), 309 (13), 295 (45), 279 (23), 265 (100), 249 (30), 235 (4.6), 211 (5.4), 198 (8.4), 183 (8.7), 171 (8.5), 155 (8.2), 141 (10), 128 (18), 115 (10), 102 (19), 75 (7.3), 59 (32), 45 (5.3); HRMS (EI) calcd for C<sub>16</sub>H<sub>17</sub>BrO<sub>5</sub> (M<sup>+</sup>): 368.0259; Found: 368.0251.

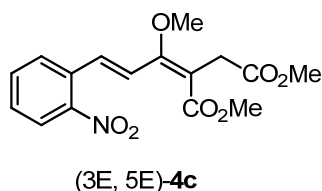

78% yield, light yellow solid, <sup>1</sup>H NMR (CDCl<sub>3</sub>, 400 MHz) δ 8.01-7.99 (m, 1H), 7.80-7.71 (m, 2H), 7.65-7.61 (m, 1H), 7.49-7.43 (m, 2H), 3.83 (s, 3H), 3.77 (s, 3H),

3.72 (s, 3H), 3.56 (s, 2H);  $^{13}\text{C}$  NMR ( $\text{CDCl}_3$ , 100 MHz)  $\delta$  171.7, 167.4, 164.3, 148.0, 133.3, 132.0, 130.9, 128.96, 128.90, 125.2, 124.6, 114.2, 60.4, 51.9, 51.8, 32.4; IR (KBr)  $\nu$  2952 (m), 1741 (s), 1710 (s), 1586 (m), 1524 (m), 1435 (s), 1346 (m); MS (EI,  $m/z$ , rel. intensity) 335 (19,  $\text{M}^+$ ), 318 (35), 304 (25), 276 (10), 262 (22), 244 (22), 230 (98), 216 (19), 200 (100), 188 (6.0), 170 (8.2), 156 (17), 141 (45), 128 (35), 120 (46), 102 (12), 92 (12), 77 (14), 59 (37), 45 (9.1); HRMS (EI) calcd for  $\text{C}_{16}\text{H}_{17}\text{NO}_7$  ( $\text{M}^+$ ): 335.1005; Found: 335.1004.

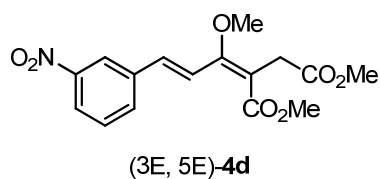

83% yield, light yellow solid,  $^1\text{H}$  NMR ( $\text{CDCl}_3$ , 400 MHz)  $\delta$  8.32 (t,  $J = 2.0$  Hz, 1H), 8.15-8.13 (m, 1H), 7.92-7.86 (m, 2H), 7.57-7.53 (m, 1H), 7.08 (d,  $J = 16.8$  Hz, 1H), 3.79 (s, 3H), 3.77 (s, 3H), 3.72 (s, 3H), 3.56 (s, 2H);  $^{13}\text{C}$  NMR ( $\text{CDCl}_3$ , 100 MHz)  $\delta$  171.5, 167.2, 164.0, 148.5, 137.8, 133.0, 132.5, 129.6, 123.5, 123.0, 122.0, 114.8, 60.5, 51.9, 51.8, 32.6; IR (KBr)  $\nu$  2953 (m), 1732 (s), 1737 (s), 1705 (s), 1600 (m), 1519 (s), 1435 (m), 1443 (s); MS (EI,  $m/z$ , rel. intensity) 335 (6.7,  $\text{M}^+$ ), 304 (12), 276 (19), 262 (24), 244 (16), 230 (100), 216 (38), 200 (6.2), 184 (3.4), 170 (4.7), 155 (4.3), 141 (5.1), 128 (11), 115 (8.2), 102 (5.9), 89 (1.7), 75 (3.2), 59 (13), 45 (3.2); HRMS (EI) calcd for  $\text{C}_{16}\text{H}_{17}\text{NO}_7$  ( $\text{M}^+$ ): 335.1005; Found: 335.1009.

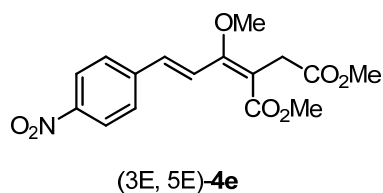

90% yield, light yellow solid,  $^1\text{H}$  NMR ( $\text{CDCl}_3$ , 400 MHz)  $\delta$  8.20 (d,  $J = 8.4$  Hz, 2H), 7.96 (d,  $J = 16.4$  Hz, 1H), 7.66 (d,  $J = 8.4$  Hz, 2H), 7.08 (d,  $J = 16.0$  Hz, 1H), 3.79 (s, 3H), 3.77 (s, 3H), 3.72 (s, 3H), 3.57 (s, 2H);  $^{13}\text{C}$  NMR ( $\text{CDCl}_3$ , 100 MHz)  $\delta$  171.5, 167.2, 164.0, 147.3, 142.4, 132.9, 127.8, 124.8, 123.9, 115.4, 60.6, 51.91, 51.87, 32.6; IR (KBr)  $\nu$  2953 (m), 1732 (s), 1737 (s), 1705 (s), 1600 (m), 1519 (s), 1435 (m), 1443 (s); MS (EI,  $m/z$ , rel. intensity) 335 (6.7,  $\text{M}^+$ ), 304 (12), 276 (19), 262

(24), 244 (16), 230 (100), 216 (38), 198 (5.9), 186 (3.0), 170 (5.5), 155 (3.3), 141 (3.7), 128 (10), 102 (6.8), 89 (2.0), 75 (2.8), 59 (15), 45 (3.5); HRMS (EI) calcd for  $C_{16}H_{17}NO_7$  ( $M^+$ ): 335.1005; Found: 335.1009.

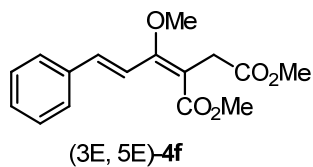

90% yield, white solid,  $^1H$  NMR ( $CDCl_3$ , 400 MHz)  $\delta$  7.78 (d,  $J = 16.4$  Hz, 1H), 7.53 (d,  $J = 7.6$  Hz, 2H), 7.37-7.27 (m, 3H), 7.04 (d,  $J = 16.0$  Hz, 1H), 3.76 (s, 3H), 3.74 (s, 3H), 3.70 (s, 3H), 3.54 (s, 2H);  $^{13}C$  NMR ( $CDCl_3$ , 100 MHz)  $\delta$  172.0, 167.6, 165.2, 136.0, 128.8, 128.6, 127.4, 120.4, 112.9, 60.4, 51.8, 51.7, 32.6; IR (KBr)  $\nu$  2955(m), 1732 (s), 1689 (m), 1607 (m), 1575 (m), 1437 (m); MS (EI, m/z, rel. intensity) 290 (3.8,  $M^+$ ), 259 (9.6), 231 (16), 217 (46), 199 (32), 185 (100), 171 (43), 157 (6.5), 141 (13), 128 (21), 115 (15), 103 (12), 91 (4.0), 77 (9.8), 59 (14), 45 (3.2); HRMS (EI) calcd for  $C_{16}H_{18}O_5$  ( $M^+$ ): 290.1154; Found: 290.1157.

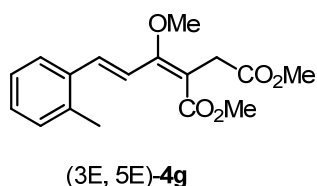

71% yield, colorless liquid,  $^1H$  NMR ( $CDCl_3$ , 400 MHz)  $\delta$  7.67-7.63 (m, 2H), 7.30 (d,  $J = 16.0$  Hz, 1H), 7.22-7.17 (m, 3H), 3.76 (m, 6H), 3.71 (s, 3H), 3.54 (s, 2H), 2.40 (s, 3H);  $^{13}C$  NMR ( $CDCl_3$ , 100 MHz)  $\delta$  172.0, 167.6, 165.4, 136.4, 134.9, 133.6, 130.4, 128.6, 126.2, 126.0, 121.3, 112.7, 60.4, 51.8, 51.7, 32.6, 19.7; IR (KBr)  $\nu$  2950 (m), 1741(s), 1710 (s), 1619 (m), 1587 (m), 1435 (m); MS (EI, m/z, rel. intensity) 304 (1.2,  $M^+$ ), 273 (6.7), 245 (12), 231 (47), 213 (19), 199 (100), 185 (32), 153 (26), 128 (12), 115 (24), 105 (4.2), 84 (43), 59 (18), 45 (4.5); HRMS (EI) calcd for  $C_{17}H_{20}O_5$  ( $M^+$ ): 304.1311; Found: 304.1310.

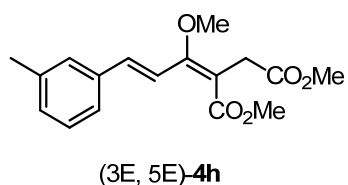

77% yield, colorless liquid,  $^1\text{H}$  NMR ( $\text{CDCl}_3$ , 400 MHz)  $\delta$  7.78 (d,  $J = 16.0$  Hz, 1H), 7.34-7.32 (m, 2H), 7.24 (t,  $J = 8.0$  Hz, 1H), 7.12 (d,  $J = 7.6$  Hz, 1H), 7.02(d,  $J = 16.4$  Hz, 1H), 3.76 (s, 3H), 3.73 (s, 3H), 3.70 (s, 3H), 3.54 (s, 2H), 2.36 (s, 3H);  $^{13}\text{C}$  NMR ( $\text{CDCl}_3$ , 100 MHz)  $\delta$  172.0, 167.6, 165.4, 138.2, 136.2, 135.8, 129.7, 128.5, 127.9, 124.6, 120.1, 112.6, 60.4, 51.8, 51.6, 32.5, 21.2; IR (KBr)  $\nu$  2950 (s), 2842 (m), 1743(s), 1712 (s), 1621 (m), 1588 (m), 1435 (m); MS (EI, m/z, rel. intensity) 304 (1.9,  $\text{M}^+$ ), 273 (4.8), 245 (10), 230 (52), 213 (36), 199 (100), 185 (40), 171 (5.2), 155 (7.9), 141 (10.9), 128 (13), 115 (17), 105 (2.2), 84 (10), 59 (14), 51 (5.3), 45 (2.5); HRMS (EI) calcd for  $\text{C}_{17}\text{H}_{20}\text{O}_5$  ( $\text{M}^+$ ): 304.1311; Found: 304.1319.

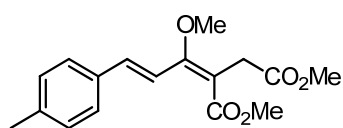

(3E, 5E)-4i

77% yield, colorless liquid,  $^1\text{H}$  NMR ( $\text{CDCl}_3$ , 400 MHz)  $\delta$  7.75 (d,  $J = 16.0$  Hz, 1H), 7.42 (d,  $J = 8.0$  Hz, 2H), 7.16 (d,  $J = 8.0$  Hz, 2H), 7.02 (d,  $J = 16.0$  Hz, 1H), 3.76 (s, 3H), 3.74 (s, 3H), 3.70 (s, 3H), 3.53 (s, 2H), 2.35 (s, 3H);  $^{13}\text{C}$  NMR ( $\text{CDCl}_3$ , 100 MHz)  $\delta$  172.1, 167.7, 165.6, 139.0, 136.0, 133.2, 129.4, 127.4, 119.4, 112.4, 60.5, 51.8, 51.7, 32.6, 21.2; IR (KBr)  $\nu$  2950 (s), 2842 (m), 1741(s), 1710 (s), 1620 (m), 1585 (m), 1435 (m); MS (EI, m/z, rel. intensity) 304 (2.1,  $\text{M}^+$ ), 273 (4.9), 245 (10), 231 (35), 213 (34), 199 (100), 185 (44), 171 (9.2), 155 (14), 128 (16), 115 (24), 105 (4.7), 84 (91), 71 (9.5), 59 (22), 43 (11); HRMS (EI) calcd for  $\text{C}_{17}\text{H}_{20}\text{O}_5$  ( $\text{M}^+$ ): 304.1311; Found: 304.1304.

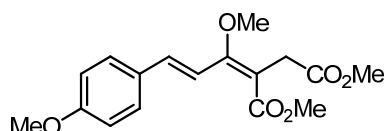

(3E, 5E)-4j

55% yield, colorless liquid,  $^1\text{H}$  NMR ( $\text{CDCl}_3$ , 400 MHz)  $\delta$  7.67 (d,  $J = 16.0$  Hz, 1H), 7.48 (d,  $J = 8.4$  Hz, 2H), 7.01 (d,  $J = 16.4$  Hz, 1H), 6.89 (d,  $J = 9.2$  Hz, 2H), 3.83 (s, 3H), 3.76 (s, 3H), 3.74 (s, 3H), 3.70 (s, 3H), 3.53 (s, 2H);  $^{13}\text{C}$  NMR ( $\text{CDCl}_3$ , 100 MHz)  $\delta$  172.2, 167.8, 165.8, 160.3, 135.8, 128.9, 128.8, 118.3, 114.1, 112.0, 60.6,

55.3, 51.9, 51.7, 32.7; IR (KBr)  $\nu$  2951(m), 2840 (m), 1741 (s), 1709 (s), 1602 (m), 1512 (m), 1435 (m); MS (EI, m/z, rel. intensity) 320 (7.2,  $M^+$ ), 289 (3.9), 261 (11), 246 (57), 229 (51), 215 (100), 201 (30), 187 (5.6), 171 (6.4), 161 (6.5), 145 (4.9), 128 (9.2), 115 (8.8), 103 (2.2), 89 (3.1), 77 (3.7), 59 (11), 45 (2.9); HRMS (EI) calcd for  $C_{17}H_{20}O_6$  ( $M^+$ ): 320.1260; Found: 320.1262.

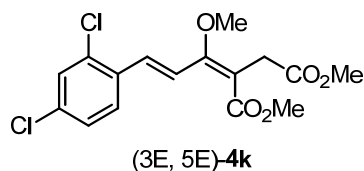

95% yield, white solid,  $^1H$  NMR ( $CDCl_3$ , 300 MHz)  $\delta$  7.73 (d,  $J = 16.8$  Hz, 1H), 7.65 (d,  $J = 8.1$  Hz, 1H), 7.41-7.24 (m, 3H), 3.78 (s, 3H), 3.77 (s, 3H), 3.72 (s, 3H), 3.55 (s, 2H);  $^{13}C$  NMR ( $CDCl_3$ , 100 MHz)  $\delta$  171.7, 167.4, 164.6, 134.7, 134.5, 132.8, 130.5, 129.4, 127.9, 127.3, 123.2, 114.1, 60.5, 51.9, 51.7, 32.5; IR (KBr)  $\nu$  2954(m), 1734 (s), 1696 (m), 1608 (m), 1581 (m), 1437 (m), 1368 (m); MS (EI, m/z, rel. intensity) 358 (4.3,  $M^+$ ), 327 (7.2), 299 (24), 285 (34), 267 (22), 253 (100), 239 (52), 225 (6.4), 211 (4.9), 199 (7.2), 173 (8.8), 162 (11), 139 (11), 113 (7.7), 99 (10), 86 (5.8), 75 (8.8), 59 (44), 49 (10); HRMS (EI) calcd for  $C_{16}H_{16}Cl_2O_5$  ( $M^+$ ): 358.0375; Found: 358.0381.

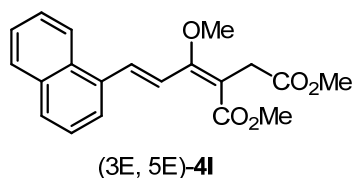

86% yield, colorless liquid,  $^1H$  NMR ( $CDCl_3$ , 300 MHz)  $\delta$  8.15 (d,  $J = 7.5$  Hz, 1H), 7.90-7.82 (m, 5H), 7.58-7.46 (m, 3H), 3.85 (s, 3H), 3.77 (s, 3H), 3.73 (s, 3H), 3.58 (s, 2H);  $^{13}C$  NMR ( $CDCl_3$ , 100 MHz)  $\delta$  172.0, 167.6, 165.2, 133.6, 133.3, 132.8, 131.2, 129.1, 128.6, 126.3, 125.8, 125.5, 124.4, 123.2, 123.0, 113.0, 60.5, 51.9, 51.7, 32.6; IR (KBr)  $\nu$  2950(m), 2841 (m), 1742 (s), 1613 (m), 1582 (m), 1508 (m), 1435 (m), 797 (m), 775 (m); MS (EI, m/z, rel. intensity) 341 (2.3,  $M^+$ ), 309 (5.6), 267 (40), 249 (14), 235 (100), 221 (24), 206 (5.1), 189 (16), 178 (7.8), 165 (4.6), 152 (10), 127 (2.0), 113 (1.8), 101 (0.5), 89 (1.1), 76 (1.6), 59 (11), 45 (1.8); HRMS (EI) calcd for

$C_{20}H_{20}O_5$  ( $M^+$ ): 340.1311; Found: 340.1314.

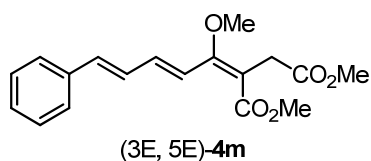

64%, yield, white solid, <sup>1</sup>H NMR (CDCl<sub>3</sub>, 400 MHz) δ 7.44 (d, *J* = 7.2 Hz, 2H), 7.36-7.24 (m, 4H), 7.01-6.95 (m, 1H), 6.90-6.83 (m, 1H), 6.75 (d, *J* = 15.2 Hz, 1H), 3.75 (s, 3H), 3.71 (s, 3H), 3.70 (s, 3H), 3.52 (s, 2H); <sup>13</sup>C NMR (CDCl<sub>3</sub>, 100 MHz) δ 172.0, 167.6, 165.2, 136.7, 136.63, 136.60, 128.6, 128.27, 128.23, 126.7, 124.3, 112.8, 60.6, 51.9, 51.7, 32.6; IR (KBr) ν 2950(m), 2850 (m), 1738 (s), 1707 (s), 1605 (m), 1256 (m), 1054 (s), 998 (s), 788 (m), 751 (m), 738 (m), 693 (m); MS (EI, *m/z*, rel. intensity) 316 (23,  $M^+$ ), 285 (4.5), 270 (5.5), 256 (5.6), 242 (27), 225 (20), 211 (100), 197 (62), 181 (19), 157 (88), 153 (33), 128 (89), 115 (51), 105 (84), 91 (91), 84 (78), 59 (100), 43 (78); HRMS (EI) calcd for  $C_{18}H_{20}O_5$  ( $M^+$ ): 316.1311; Found: 316.1305.

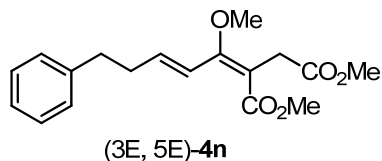

72% yield, colorless liquid, <sup>1</sup>H NMR (CDCl<sub>3</sub>, 300 MHz) δ 7.31-7.26 (m, 2H), 7.20-7.19 (m, 3H), 6.95 (d, *J* = 15.6 Hz, 1H), 6.29-6.20 (m, 1H), 3.71 (s, 3H), 3.68 (s, 3H), 3.58 (s, 3H), 3.45 (s, 2H), 2.82-2.77 (m, 2H), 2.60-2.53 (m, 2H); <sup>13</sup>C NMR (CDCl<sub>3</sub>, 100 MHz) δ 172.1, 167.8, 165.1, 141.2, 138.9, 128.32, 128.31, 125.9, 122.7, 110.8, 59.9, 51.8, 51.6, 35.0, 34.5, 32.4; IR (KBr) ν 2949 (m), 2850 (m), 1739 (s), 1712 (s), 1589 (m), 1435 (m), 1193 (s), 1053 (s), 1015 (s), 801 (s), 736 (s), 700 (s); MS (EI, *m/z*, rel. intensity) 318 (17,  $M^+$ ), 286 (5.6), 254 (8.4), 227 (22), 213 (100), 195 (5.9), 173 (9.8), 167 (12), 139 (8.3), 117 (10), 109 (12), 91 (68), 77 (4.8), 65 (10.2), 59 (9.4), 41 (2.9); HRMS (EI) calcd for  $C_{18}H_{22}O_5$  ( $M^+$ ): 318.1467; Found: 318.1469.

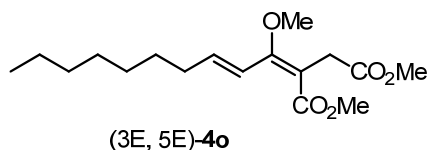

49% yield, colorless liquid, <sup>1</sup>H NMR (CDCl<sub>3</sub>, 400 MHz) δ 6.92 (d, *J* = 16.0 Hz,



1H), 6.28-6.20 (m, 1H), 3.72 (s, 3H), 3.69 (s, 3H), 3.66 (s, 3H), 3.46 (s, 2H), 2.26-2.20 (m, 2H), 1.48-1.45 (m, 2H), 1.30-1.28 (m, 8H), 0.88-0.87 (m, 3H); <sup>13</sup>C NMR (CDCl<sub>3</sub>, 100 MHz) δ 172.2, 167.8, 165.4, 140.3, 122.0, 110.4, 60.0, 51.8, 51.5, 32.8, 32.4, 31.7, 29.1, 29.0, 28.7, 22.5, 14.0; IR (KBr) ν 2926(m), 2855 (m), 1742 (s), 1715 (s), 1640 (m), 1590 (m), 1435 (m), 1194 (m), 1117 (m), 1059 (m), 978 (m), 800 (m); MS (EI, m/z, rel. intensity) 312 (8.4, M<sup>+</sup>), 281 (5.8), 253 (5.0), 213 (100), 196 (5.7), 177 (4.8), 164 (16), 149 (3.1), 137 (4.0), 123 (8.1), 109 (9.3), 95 (9.1), 79 (6.1), 59 (7.7), 41 (13); HRMS (EI) calcd for C<sub>17</sub>H<sub>28</sub>O<sub>5</sub> (M<sup>+</sup>): 312.1937; Found: 312.1941.

### X-Ray Structure of (3E, 5E)-4e (CCDC 932306)

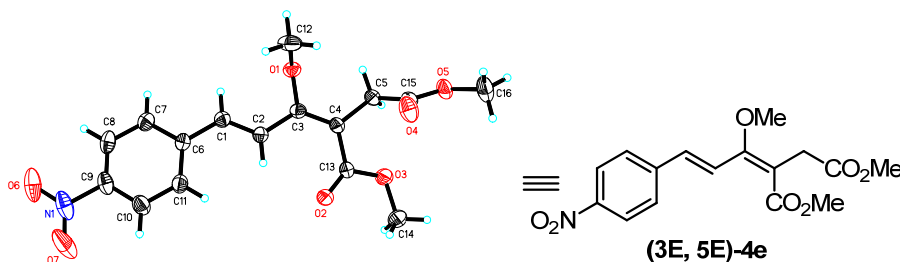

Bond precision: C-C = 0.0026 Å Wavelength=0.71073  
Cell: a=7.5752(9) b=9.2925(12) c=11.9191(15)  
alpha=90.060(2) beta=98.984(2) gamma=95.356(2)  
Temperature: 293 K

|                        | Calculated    | Reported                        |
|------------------------|---------------|---------------------------------|
| Volume                 | 825.00(18)    | 825.00(18)                      |
| Space group            | P -1          | P-1                             |
| Hall group             | -P 1          | ?                               |
| Moiety formula         | C16 H17 N O7  | ?                               |
| Sum formula            | C16 H17 N O7  | C16 H17 N O7                    |
| Mr                     | 335.31        | 335.31                          |
| Dx, g cm <sup>-3</sup> | 1.350         | 1.350                           |
| Z                      | 2             | 2                               |
| Mu (mm <sup>-1</sup> ) | 0.107         | 0.107                           |
| F000                   | 352.0         | 352.0                           |
| F000'                  | 352.22        |                                 |
| h,k,lmax               | 9,11,14       | 9,11,14                         |
| Nref                   | 3260          | 3205                            |
| Tmin,Tmax              | 0.958,0.974   | 0.786,1.000                     |
| Tmin'                  | 0.958         |                                 |
| Correction method      | EMPIRICAL     |                                 |
| Data completeness      | 0.983         | Theta(max)= 26.000              |
| R(reflections)         | 0.0571( 2472) | wR2(reflections)= 0.1731( 3205) |
| S                      | 1.032         | Npar= 221                       |

## 5. Reaction Conditions for Synthesis of Cyclopentadienes

**Table S2** Solvent effects

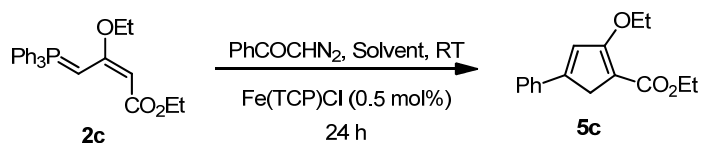

| Entry <sup>a</sup> | Solvent     | Yield (%) <sup>b</sup> | Entry | Solvent            | Yield (%) <sup>b</sup> |
|--------------------|-------------|------------------------|-------|--------------------|------------------------|
| 1                  | THF         | 44                     | 7     | PhCH <sub>3</sub>  | 47                     |
| 2                  | DME         | 54                     | 8     | PhCl               | 48                     |
| 3                  | MTBE        | 23                     | 9     | EtOAc              | 46                     |
| 4                  | 1,4-Dioxane | 44                     | 10    | <i>i</i> -PrOAc    | 47                     |
| 5                  | DCM         | 45                     | 11    | CH <sub>3</sub> CN | 33                     |
| 6                  | DCE         | 60                     | 12    | DMF                | trace                  |

<sup>a</sup> Condition: ylide **2c** (167.4 mg, 0.4 mmol), PhCOCHN<sub>2</sub> (116.8 mg, 0.8 mmol), Fe(TCP)Cl (1.7 mg, 0.002 mmol), solvent (4.0 mL), RT; <sup>b</sup> Isolated yield.

**Table S3** Reaction time

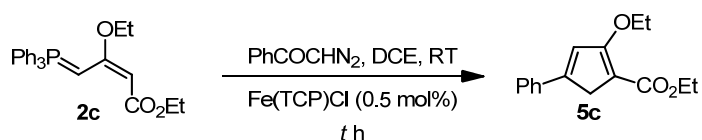

| Entry <sup>a</sup> | t (h) | Yield (%) <sup>b</sup> | Entry | t (h) | Yield (%) <sup>b</sup> |
|--------------------|-------|------------------------|-------|-------|------------------------|
| 1                  | 6     | 69                     | 4     | 36    | 47                     |
| 2                  | 15    | 60                     | 5     | 48    | 52                     |
| 3                  | 24    | 60                     |       |       |                        |

<sup>a</sup> Condition: ylide **2c** (167.4 mg, 0.4 mmol), PhCOCHN<sub>2</sub> (116.8 mg, 0.8 mmol), Fe(TCP)Cl (1.7 mg, 0.002 mmol), DCE (4.0 mL); <sup>b</sup> Isolated yield.

**Table S4** Loading of diazo phenylethanone

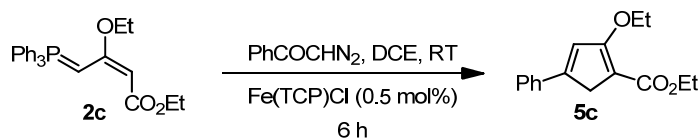

| Entry <sup>a</sup> | Ylide/Diazo | Yield (%) <sup>b</sup> | Entry | Ylide/Diazo | Yield (%) <sup>b</sup> |
|--------------------|-------------|------------------------|-------|-------------|------------------------|
| 1                  | 1.0/1.0     | 45                     | 4     | 1.0/1.5     | 67                     |
| 2                  | 1.0/1.2     | 55                     | 5     | 1.0/2.0     | 69                     |
| 3                  | 1.0/1.4     | 67                     | 6     | 1.0/2.5     | 54                     |

<sup>a</sup> Condition: ylide **2c** (167.4 mg, 0.4 mmol),  $\text{PhCOCHN}_2$ ,  $\text{Fe(TCP)Cl}$  (1.7 mg, 0.002 mmol), DCE (4.0 mL), 6 h; <sup>b</sup> Isolated yield.

**Table S5** Reaction temperature

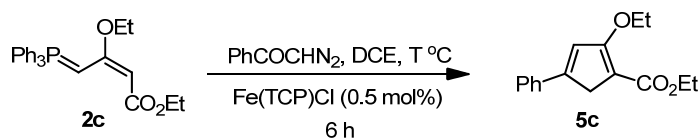

| Entry <sup>a</sup> | T (°C) | Yield (%) <sup>b</sup> | Entry <sup>a</sup> | T (°C) | Yield (%) <sup>b</sup> |
|--------------------|--------|------------------------|--------------------|--------|------------------------|
| 1                  | 0      | 70                     | 5                  | 45     | 62                     |
| 2                  | 10     | 74                     | 6                  | 55     | 59                     |
| 3                  | 20     | 76                     | 7 <sup>c</sup>     | 20     | 65                     |
| 4                  | 35     | 68                     |                    |        |                        |

<sup>a</sup> Condition: ylide **2c** (167.4 mg, 0.4 mmol),  $\text{PhCOCHN}_2$  (81.8 mg, 0.56 mmol),  $\text{Fe(TCP)Cl}$  (1.7 mg, 0.002 mmol), DCE (4.0 mL), 6 h; <sup>b</sup> Isolated yield; <sup>c</sup> Under the same condition,  $t = 12$  h.

## 6. General Procedure for Synthesis of Cyclopentadienes

General procedure: To a stirred suspension of ylide **2** (0.4 mmol) in dry DCE (2.0 mL) under N<sub>2</sub> at room temperature was added Fe(TCP)Cl (1.7 mg, 0.002 mmol) and RCOCHN<sub>2</sub> (0.56 mmol) sequentially at 20 °C. (Caution! N<sub>2</sub> Release!) The resulting mixture was stirred at 20 °C for 6 hours. After the reaction was complete, the resulting mixture was concentrated and the residue was purified by chromatography on silica gel to afford the desired products.

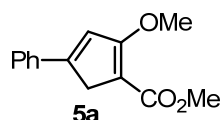

65% yield, light yellow solid, <sup>1</sup>H NMR (CDCl<sub>3</sub>, 400 MHz) δ 7.58 (d, *J* = 6.8 Hz, 2H), 7.39-7.29 (m, 3H), 6.93 (s, 1H), 4.04 (s, 3H), 3.78 (s, 3H), 3.70 (s, 3H); <sup>13</sup>C NMR (CDCl<sub>3</sub>, 100 MHz) δ 168.2, 164.3, 152.9, 134.3, 128.80, 128.79, 125.5, 119.0, 104.6, 58.6, 50.8, 38.3; IR (KBr) ν 2946 (m), 1697 (s), 1673 (s), 1610 (m), 1456 (m), 1392 (m), 1209 (s), 1079 (s); MS (EI, *m/z*, rel. intensity) 230 (81, M<sup>+</sup>), 199 (21), 171 (100), 155 (13), 142 (10), 128 (48), 115 (17), 105 (17), 91 (5.5), 77 (16), 57 (4); HRMS (EI) calcd for C<sub>14</sub>H<sub>14</sub>O<sub>3</sub> (M<sup>+</sup>): 230.0943; Found: 230.0947.

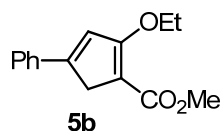

74% yield, light yellow solid, <sup>1</sup>H NMR (CDCl<sub>3</sub>, 300 MHz) δ 7.58 (d, *J* = 7.5 Hz, 2H), 7.40-7.29 (m, 3H), 6.90 (s, 1H), 4.32 (q, *J* = 7.1 Hz, 2H), 3.78 (s, 3H), 3.70 (s, 2H), 1.47 (t, *J* = 6.9 Hz, 3H); <sup>13</sup>C NMR (CDCl<sub>3</sub>, 100 MHz) δ 167.7, 164.4, 152.7, 134.4, 128.8, 128.76, 125.5, 119.7, 104.8, 67.1, 50.7, 38.1, 15.2; IR (KBr) ν 2983 (m), 2945 (m), 1697 (s), 1674 (s), 1609 (m), 1448 (m), 1386 (m), 1208 (s), 1074 (s); MS (EI, *m/z*, rel. intensity) 244 (83, M<sup>+</sup>), 213 (17), 185 (38), 157 (77), 128 (100), 115 (18), 108 (12), 102 (21), 91 (5.5), 77 (16); HRMS (EI) calcd for C<sub>15</sub>H<sub>16</sub>O<sub>3</sub> (M<sup>+</sup>): 244.1099; Found: 244.1100.

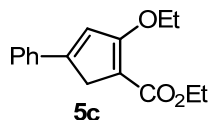

76% yield, light yellow solid,  $^1\text{H}$  NMR ( $\text{CDCl}_3$ , 300 MHz)  $\delta$  7.57 (d,  $J = 6.9$  Hz, 2H), 7.40-7.30 (m, 3H), 6.89 (s, 1H), 4.35-4.20 (m, 4H), 3.69 (s, 2H), 1.47 (t,  $J = 7.0$  Hz, 3H), 1.33 (t,  $J = 7.0$  Hz, 3H).

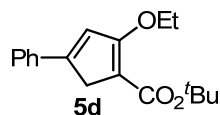

50% yield, light yellow solid,  $^1\text{H}$  NMR ( $\text{CDCl}_3$ , 300 MHz)  $\delta$  7.56 (d,  $J = 6.9$  Hz, 2H), 7.38-7.26 (m, 3H), 6.87 (s, 1H), 4.29 (q,  $J = 7.1$  Hz, 2H), 3.62 (s, 2H), 1.54 (s, 9H), 1.46 (t,  $J = 7.2$  Hz, 3H);  $^{13}\text{C}$  NMR ( $\text{CDCl}_3$ , 100 MHz)  $\delta$  170.0, 163.8, 151.8, 134.7, 128.8, 128.5, 125.5, 119.8, 106.9, 79.0, 66.8, 38.2, 28.5, 15.2; IR (KBr)  $\nu$  2976 (m), 2928 (m), 1693 (s), 1670 (s), 1610 (m), 1413 (m), 1389 (m), 1168 (s), 1063 (m); MS (EI,  $m/z$ , rel. intensity) 286 (30,  $\text{M}^+$ ), 244 (26), 230 (48), 213 (24), 184 (55), 157 (74), 128 (100), 115 (17), 108 (26), 91 (9), 77 (20), 57 (36); HRMS (EI) calcd for  $\text{C}_{18}\text{H}_{22}\text{O}_3$  ( $\text{M}^+$ ): 286.1569; Found: 286.1565.

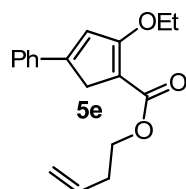

40% yield, light yellow liquid,  $^1\text{H}$  NMR ( $\text{CDCl}_3$ , 300 MHz)  $\delta$  7.57 (d,  $J = 7.5$  Hz, 2H), 7.40-7.28 (m, 3H), 6.90 (s, 1H), 5.96-5.82 (m, 1H), 5.13 (m, 2H), 4.34-4.22 (m, 4H), 3.68 (s, 2H), 2.47 (q,  $J = 6.8$  Hz, 2H), 1.47 (t,  $J = 7.0$  Hz, 3H);  $^{13}\text{C}$  NMR ( $\text{CDCl}_3$ , 75 MHz)  $\delta$  167.8, 164.0, 152.6, 134.7, 134.4, 128.8, 128.7, 125.5, 119.7, 116.8, 104.9, 67.0, 62.5, 37.9, 33.4, 15.2; IR (KBr)  $\nu$  2979 (m), 2927 (m), 1698 (s), 1672 (s), 1609 (m), 1205 (s), 1071 (s); MS (EI,  $m/z$ , rel. intensity) 284 (30,  $\text{M}^+$ ), 255 (5.6), 230 (10), 213 (30), 199 (15), 186 (50), 157 (100), 128 (85), 115 (20), 108 (63), 102 (21), 91 (11), 77 (23), 55 (46); HRMS (EI) calcd for  $\text{C}_{18}\text{H}_{20}\text{O}_3$  ( $\text{M}^+$ ): 284.1412; Found: 284.1413.

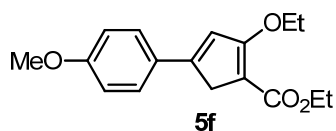

45% yield, light yellow solid,  $^1\text{H}$  NMR ( $\text{CDCl}_3$ , 400 MHz)  $\delta$  7.49 (d,  $J = 8.4$  Hz, 2H), 7.42 (d,  $J = 8.8$  Hz, 2H), 6.89 (s, 1H), 4.33-4.21 (m, 4H), 3.84 (s, 3H), 3.64 (s, 2H), 1.46 (t,  $J = 7.0$  Hz, 3H), 1.32 (t,  $J = 7.0$  Hz, 3H);  $^{13}\text{C}$  NMR ( $\text{CDCl}_3$ , 100 MHz)  $\delta$  168.2, 164.1, 160.1, 152.5, 127.4, 127.0, 117.7, 114.1, 104.0, 67.0, 59.2, 55.3, 38.0, 15.2, 14.6; IR (neat)  $\nu$  2926 (m), 2853 (m), 1667 (s), 1605 (s), 1506 (m), 1425 (m), 1254 (s), 1207 (s), 1074 (s), 1025 (s), 811 (m), 738 (m); MS (EI,  $m/z$ , rel. intensity) 288 (43,  $\text{M}^+$ ), 259 (4.8), 243 (11), 231 (4.3), 215 (36), 203 (5.0), 187 (70), 172 (11), 158 (14), 144 (21), 128 (27), 115 (100), 102 (13), 89 (42), 77 (29), 63 (26), 55 (17), 43 (19); HRMS (EI) calcd for  $\text{C}_{17}\text{H}_{20}\text{O}_4$  ( $\text{M}^+$ ): 288.1362; Found: 288.1366.

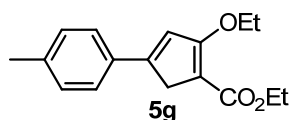

49% yield, light yellow solid,  $^1\text{H}$  NMR ( $\text{CDCl}_3$ , 300 MHz)  $\delta$  7.46 (d,  $J = 8.1$  Hz, 2H), 7.17 (d,  $J = 7.8$  Hz, 2H), 6.83 (s, 1H), 4.33-4.20 (m, 4H), 3.66 (s, 2H), 2.36 (s, 3H), 1.46 (t,  $J = 7.0$  Hz, 3H), 1.32 (t,  $J = 7.2$  Hz, 3H);  $^{13}\text{C}$  NMR ( $\text{CDCl}_3$ , 75 MHz)  $\delta$  167.9, 164.1, 152.7, 138.8, 131.8, 129.4, 125.4, 118.8, 104.5, 67.0, 59.2, 38.0, 21.3, 15.2, 14.5; IR (KBr)  $\nu$  2984 (m), 2892 (m), 1674 (s), 1610 (s), 1425 (m), 1281 (m), 1200 (s), 1074 (m), 801 (m); MS (EI,  $m/z$ , rel. intensity) 272 (61,  $\text{M}^+$ ), 227 (23), 199 (31), 191 (100), 171 (84), 141 (40), 128 (22), 115 (48), 91 (14); HRMS (EI) calcd for  $\text{C}_{17}\text{H}_{20}\text{O}_3$  ( $\text{M}^+$ ): 272.1412; Found: 272.1413.

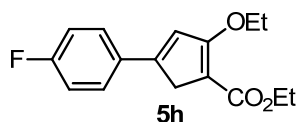

57% yield, light yellow solid,  $^1\text{H}$  NMR ( $\text{CDCl}_3$ , 300 MHz)  $\delta$  7.57-7.52 (m, 2H), 7.08-7.03 (m, 2H), 6.82 (s, 1H), 4.34-4.20 (m, 4H), 3.65 (s, 2H), 1.46 (t,  $J = 7.0$  Hz, 3H), 1.32 (t,  $J = 7.2$  Hz, 3H);  $^{13}\text{C}$  NMR ( $\text{CDCl}_3$ , 100 MHz)  $\delta$  167.6, 164.0 (d,  $J = 14.8$  Hz, 1C), 161.6, 151.2, 130.8 (d,  $J = 4.0$  Hz, 1C), 127.3 (d,  $J = 7.5$  Hz, 1C), 119.6,

115.8 (d,  $J = 22.6$  Hz, 1C), 105.0, 67.0, 59.2, 38.2, 15.1, 14.5;  $^{19}\text{F}$  NMR ( $\text{CDCl}_3$ , 376 MHz)  $\delta$  -112.2 – -112.3 (m, 1F); IR (neat)  $\nu$  2982 (m), 2926 (m), 1691 (s), 1610 (s), 1503 (s), 1207 (s), 1097 (s), 823 (s), 736 (s); MS (EI,  $m/z$ , rel. intensity) 337 (22,  $\text{M}^+$ ), 308 (8.0), 276 (48), 248 (4.7), 231 (17), 203 (41), 175 (100), 146 (84), 133 (19), 120 (24), 101 (8.2), 83 (13), 57 (7.6), 43 (13); HRMS (EI) calcd for  $\text{C}_{16}\text{H}_{17}\text{FO}_3$  ( $\text{M}^+$ ): 276.1162; Found: 276.1163.

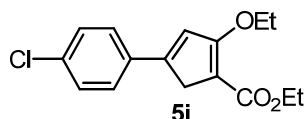

48% yield, light yellow solid,  $^1\text{H}$  NMR ( $\text{CDCl}_3$ , 400 MHz)  $\delta$  7.49 (d,  $J = 8.4$  Hz, 2H), 7.33 (d,  $J = 8.8$  Hz, 2H), 6.87 (s, 1H), 4.33-4.21 (m, 4H), 3.64 (s, 2H), 1.46 (t,  $J = 7.2$  Hz, 3H), 1.32 (t,  $J = 7.0$  Hz, 3H);  $^{13}\text{C}$  NMR ( $\text{CDCl}_3$ , 100 MHz)  $\delta$  167.4, 163.9, 150.9, 134.4, 133.0, 129.0, 126.7, 120.3, 105.4, 67.1, 59.3, 38.1, 15.2, 15.0; IR (KBr)  $\nu$  2979 (m), 2929 (m), 1662 (s), 1610 (m), 1434 (m), 1206 (s), 1103 (m), 813 (m); MS (EI,  $m/z$ , rel. intensity) 292 (90,  $\text{M}^+$ ), 264 (8.1), 247 (25), 220 (60), 191 (100), 155 (25), 127 (46), 115 (13), 101 (12), 75 (10), 43 (10); HRMS (EI) calcd for  $\text{C}_{16}\text{H}_{17}\text{ClO}_3$  ( $\text{M}^+$ ): 292.0866; Found: 292.0867.

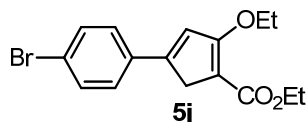

48% yield, light yellow solid,  $^1\text{H}$  NMR ( $\text{CDCl}_3$ , 400 MHz)  $\delta$  7.49 (d,  $J = 8.4$  Hz, 2H), 7.42 (d,  $J = 8.8$  Hz, 2H), 6.89 (s, 1H), 4.33-4.21 (m, 4H), 3.64 (s, 2H), 1.46 (t,  $J = 7.0$  Hz, 3H), 1.32 (t,  $J = 7.0$  Hz, 3H);  $^{13}\text{C}$  NMR ( $\text{CDCl}_3$ , 100 MHz)  $\delta$  167.4, 163.9, 150.9, 133.3, 131.9, 126.9, 122.6, 120.4, 105.5, 67.1, 59.3, 38.0, 15.1, 14.5; IR (neat)  $\nu$  2982 (m), 2854 (m), 1689 (s), 1664 (s), 1610 (s), 1206 (s), 1069 (s), 810 (s), 736 (s); MS (EI,  $m/z$ , rel. intensity) 337 (22,  $\text{M}^+$ ), 308 (8.0), 291 (21), 264 (92), 235 (100), 155 (42), 128 (79), 115 (27), 101 (22), 75 (20), 43 (15); HRMS (EI) calcd for  $\text{C}_{16}\text{H}_{17}\text{BrO}_3$  ( $\text{M}^+$ ): 336.0361; Found: 336.0358.



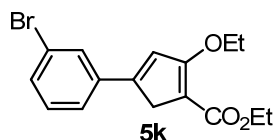

70% yield, light yellow solid,  $^1\text{H}$  NMR ( $\text{CDCl}_3$ , 300 MHz)  $\delta$  7.70 (s, 1H), 7.49-7.40 (m, 2H), 7.26-7.20 (m, 1H), 6.90 (s, 1H), 4.34-4.20 (m, 4H), 3.64 (s, 2H), 1.46 (t,  $J = 6.9$  Hz, 3H), 1.33 (t,  $J = 7.0$  Hz, 3H);  $^{13}\text{C}$  NMR ( $\text{CDCl}_3$ , 75 MHz)  $\delta$  167.2, 163.8, 150.5, 136.5, 131.4, 130.3, 128.4, 124.0, 123.0, 121.1, 105.8, 67.1, 59.3, 38.0, 15.1, 14.5; IR (KBr)  $\nu$  2982 (m), 2929 (m), 1693 (s), 1610 (s), 1561 (m), 1209 (s), 1070 (s), 737 (s); MS (EI, m/z, rel. intensity) 338 (19,  $\text{M}^+$ ), 293 (9.1), 264(34), 235 (33), 153 (92), 127 (31), 110 (52), 97 (95), 81 (61), 57 (100), 43 (97); HRMS (EI) calcd for  $\text{C}_{16}\text{H}_{17}\text{BrO}_3$  ( $\text{M}^+$ ): 336.0361; Found: 336.0366.

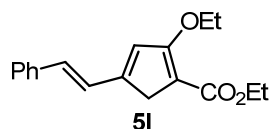

46% yield, light yellow solid,  $^1\text{H}$  NMR ( $\text{CDCl}_3$ , 300 MHz)  $\delta$  7.46 (d,  $J = 8.2$  Hz, 2H), 7.35 (t,  $J = 8.2$  Hz, 2H), 7.29-7.24 (m, 1H), 7.00 (d,  $J = 16.2$  Hz, 1H), 6.90 (d,  $J = 15.9$  Hz, 1H), 6.52 (s, 1H), 4.28-4.20 (m, 4H), 3.54 (s, 2H), 1.44 (t,  $J = 7.0$  Hz, 3H), 1.32 (t,  $J = 6.9$  Hz, 3H);  $^{13}\text{C}$  NMR ( $\text{CDCl}_3$ , 75 MHz)  $\delta$  167.7, 164.0, 151.8, 136.5, 131.7, 128.8, 128.2, 126.6, 123.8, 123.3, 104.5, 67.0, 59.2, 36.5, 15.1, 14.6; IR (KBr)  $\nu$  2986 (m), 2939 (m), 1669(s), 1693 (s), 1595 (s), 1524 (m), 1210 (s), 1147 (m), 1069 (s); MS (EI, m/z, rel. intensity) 284 (93,  $\text{M}^+$ ), 239 (30), 210 (52), 183 (80), 165 (100), 153 (78), 141 (37), 128 (35), 115 (26), 102 (9.0), 91 (12), 77 (16), 55(19); HRMS (EI) calcd for  $\text{C}_{18}\text{H}_{20}\text{O}_3$  ( $\text{M}^+$ ): 284.1412; Found: 284.1415.

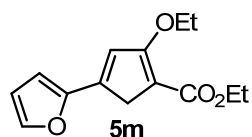

70% yield, light yellow solid,  $^1\text{H}$  NMR ( $\text{CDCl}_3$ , 300 MHz)  $\delta$  7.42 (s, 2H), 6.75 (s, 1H), 6.55 (d,  $J = 3.0$  Hz, 1H), 6.46-6.44 (m, 1H), 4.32-4.19 (m, 4H), 3.60 (s, 2H), 1.45 (t,  $J = 6.9$  Hz, 3H), 1.32 (t,  $J = 6.9$  Hz, 3H);  $^{13}\text{C}$  NMR ( $\text{CDCl}_3$ , 75 MHz)  $\delta$  167.8, 164.0, 150.9, 142.9, 141.5, 118.1, 111.9, 108.7, 103.7, 67.0, 59.2, 36.9, 15.1, 14.5; IR

(KBr)  $\nu$  2980 (m), 2934 (m), 1697(s), 1620 (m), 1577 (s), 1523 (m), 1217 (s), 1199 (m), 1068 (s); MS (EI, m/z, rel. intensity) 248 (48,  $M^+$ ), 175 (47), 147 (100), 118 (16), 91 (19), 77 (5.4), 65 (11), 55(3.7); HRMS (EI) calcd for  $C_{14}H_{16}O_4$  ( $M^+$ ): 248.1049; Found: 248.1052.

## 7. Procedure for Chemical Transformation<sup>2</sup>

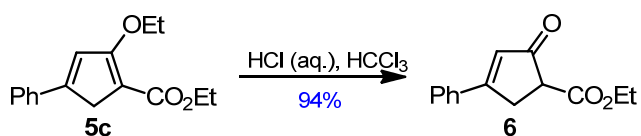

To a solution of **5c** (103.3 mg, 0.4 mmol) in CHCl<sub>3</sub> (8.0 mL) was added aq. HCl (8.0 mL, 2.0 M in H<sub>2</sub>O) at room temperature. After stirred at the same temperature for 24 hours, the aqueous layer was extracted with CHCl<sub>3</sub> (3 × 10 mL). The combined organic layer was dried over Mg<sub>2</sub>SO<sub>4</sub>, filtered and concentrated. The residue was purified by chromatography on silica gel to afford the desired product **6** (85.6 mg, 94% yield).

<sup>1</sup>H NMR (CDCl<sub>3</sub>, 400 MHz) δ 7.69-7.67 (m, 2H), 7.53-7.45 (m, 3H), 6.53 (t, *J* = 1.8 Hz, 1H), 4.27 (q, *J* = 7.1 Hz, 2H), 3.63 (dd, *J* = 2.2, 10.5 Hz, 1H), 3.55 (ddd, *J* = 1.9, 2.9, 18.0 Hz, 1H), 3.25 (ddd, *J* = 1.7, 3.3, 18.2 Hz, 1H), 1.32 (t, *J* = 7.0 Hz, 3H).

## 8. General Procedure for Deuterium Experiment

### Synthesis of $d_3$ -MDA<sup>3,4</sup>

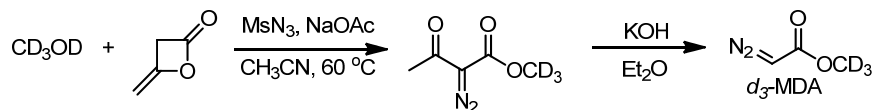

To a mixture of  $MsN_3$  (9.1 g, 75 mmol),  $NaOAc$  (492 mg, 6 mmol) in  $CH_3CN$  (60 mL) was added  $CD_3OD$  (2.7 mL, 60 mmol) under  $N_2$ . The resulting mixture was heated to  $60\text{ }^\circ\text{C}$ , and then diketene (9.2 mL, 120 mmol) in  $CH_3CN$  (10 mL) was added dropwise in 7 hours. After refluxed for 20 hours, the reaction system was cooled to room temperature and diluted with brine (50 mL). The aqueous layer was extracted with  $Et_2O$  ( $3 \times 50\text{ mL}$ ), and the combined organic layers were dried over anhydrous  $MgSO_4$ , filtered, and concentrated under reduced pressure. The residue was subjected to the next step without further purification.

To a solution of upper products in  $Et_2O$  (200 mL) was added  $KOH$  (150 mL, 7 wt% in water, 210 mmol) at  $0\text{ }^\circ\text{C}$ , and then the reaction was warmed up to room temperature. After the reaction was complete, the organic layer was separated and the aqueous layer was extracted with  $Et_2O$  ( $3 \times 50\text{ mL}$ ). The combined organic layers were dried over  $MgSO_4$ , filtered, and concentrated under reduced pressure. The residue was purified by distillation under vacuum to afford  $d_3$ -MDA as a light yellow liquid (2.2 g, 43% for two steps).

$^1H$  NMR ( $CDCl_3$ , 400 MHz)  $\delta$  4.76 (brs, 1H).

### Deuterium Experiment

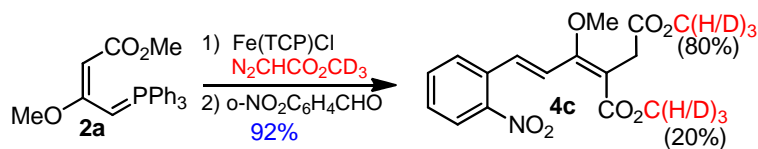

To a stirred suspension of phosphorus ylide **2a** (195 mg, 0.5 mmol) in dry  $CH_3CN$  (2.0 mL) under  $N_2$  at room temperature was added  $Fe(TCP)Cl$  (1.7 mg, 0.002 mmol),  $d_3$ -MDA (50  $\mu\text{L}$ , 0.6 mmol) and  $CH_3CN$  (1.0 mL) were added to the system

sequentially (Caution! N<sub>2</sub> Release!). Ten minutes later, *o*-NO<sub>2</sub>C<sub>6</sub>H<sub>4</sub>CHO (60.4 mg, 0.4 mmol) and CH<sub>3</sub>CN (1.0 mL) were added and the resulting mixture was stirred at room temperature for 6 hours. After the reaction was complete, the resulting mixture was filtered rapidly through a funnel with a thin layer of silica gel and eluted with CH<sub>2</sub>Cl<sub>2</sub>. The filtrate was concentrated and the residue was purified by chromatography on silica gel to afford the desired products (**3E**, **5E**)-**4c** as a light yellow solid (123.8 mg, 92% yield).

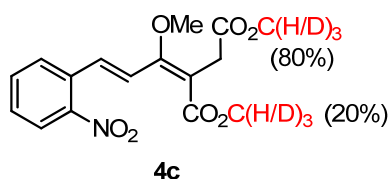

92% yield, light yellow solid, <sup>1</sup>H NMR (CDCl<sub>3</sub>, 400 MHz) δ 8.01 (d, *J* = 8.4 Hz, 1 H), 7.81-7.71 (m, 2H), 7.63 (t, *J* = 7.0 Hz, 1H), 7.50-7.43 (m, 2H), 3.83 (s, 3H), 3.77 (s, 2.4 H), 3.72 (s, 0.6 H), 3.56 (s, 2H).

## References:

---

1. V. V. Borovkov, J. M. Lintuluoto, Y. Inoue, *Synlett*. **1999**, 61.
2. M. Hatanaka, Y. Himeda, R. Imashiro, Y. Tanaka, I. Ueda, *J. Org. Chem.* **1994**, *59*, 111.
3. a) H. M. L. Davies, J. H. Houser, G. Thornley, *J. Org. Chem.* **1995**, *60*, 7529. b) K. Ohtaka, M. Kajiwara, *J. Label. Compd. Radiopharm.* **2003**, *46*, 1177.
4. L. McElwee-White, D. A. Dougherty, *J. Am. Chem. Soc.* **1984**, *106*, 3466.

## 9. NMR Spectra of the Compounds

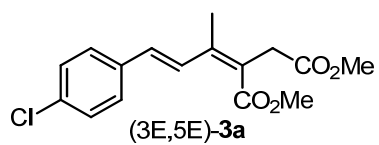

<sup>1</sup>H NMR (400 M Hz in CDCl<sub>3</sub>)

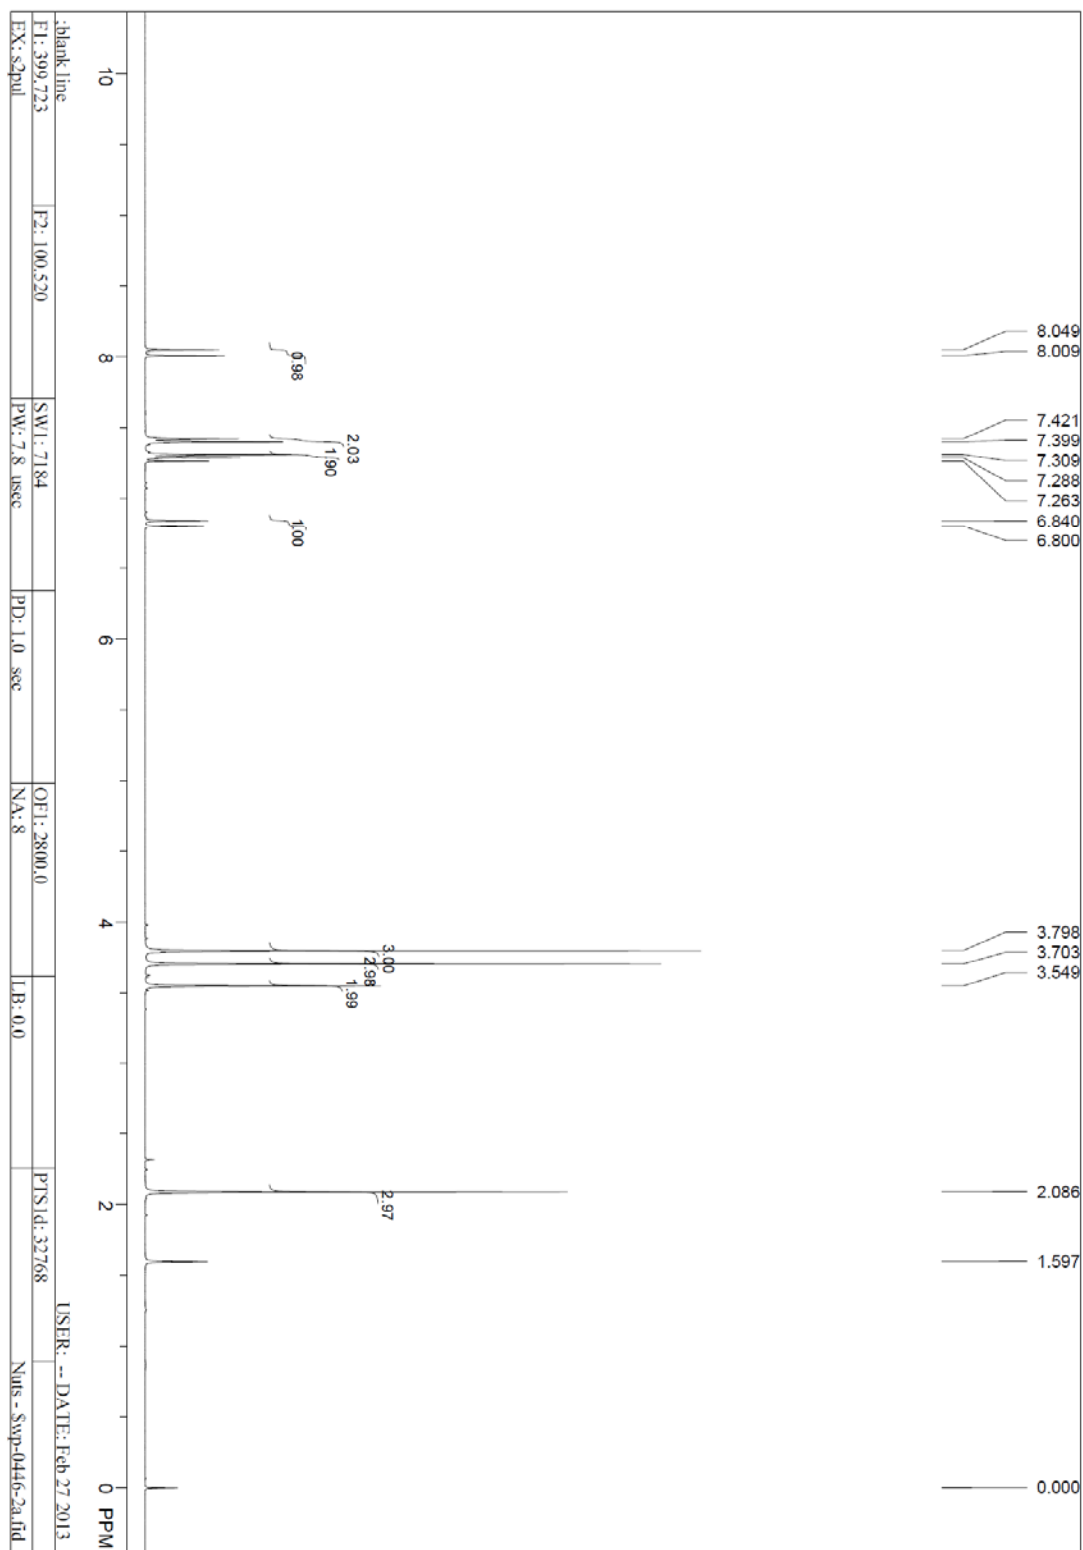

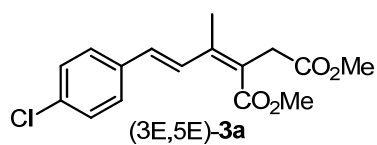

$^{13}\text{C}$  NMR (100 MHz in  $\text{CDCl}_3$ )

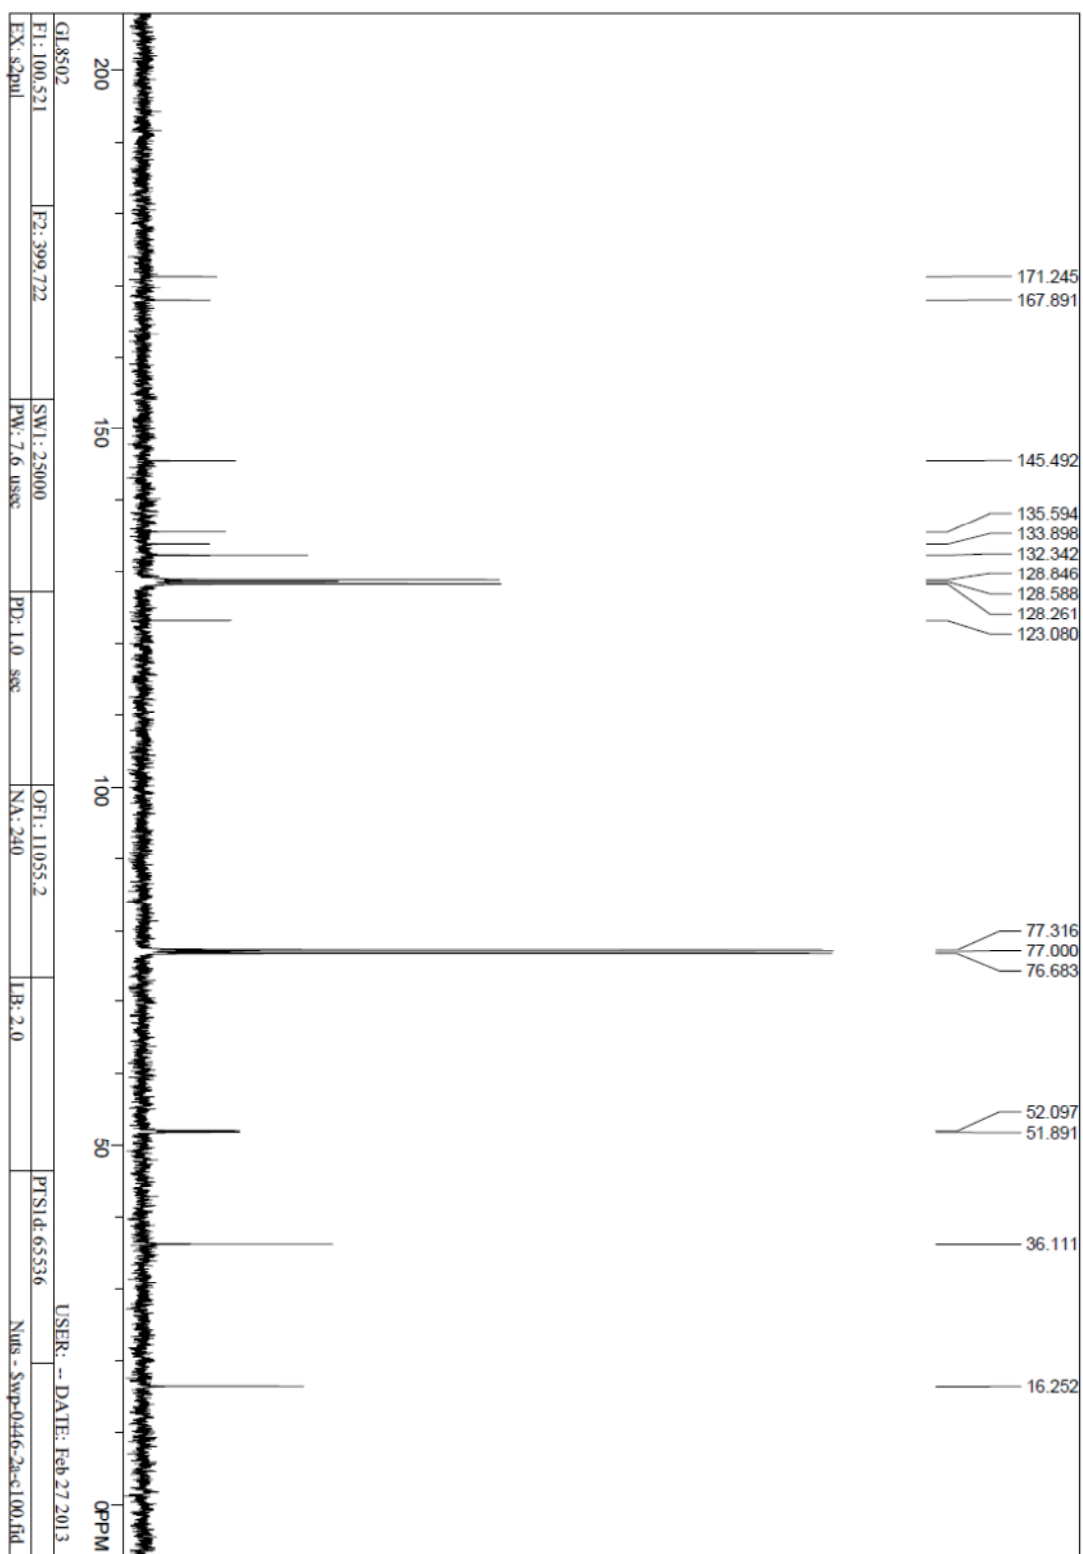



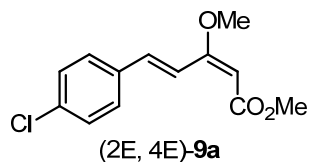

$^1\text{H NMR}$  (400 M Hz in  $\text{CDCl}_3$ )

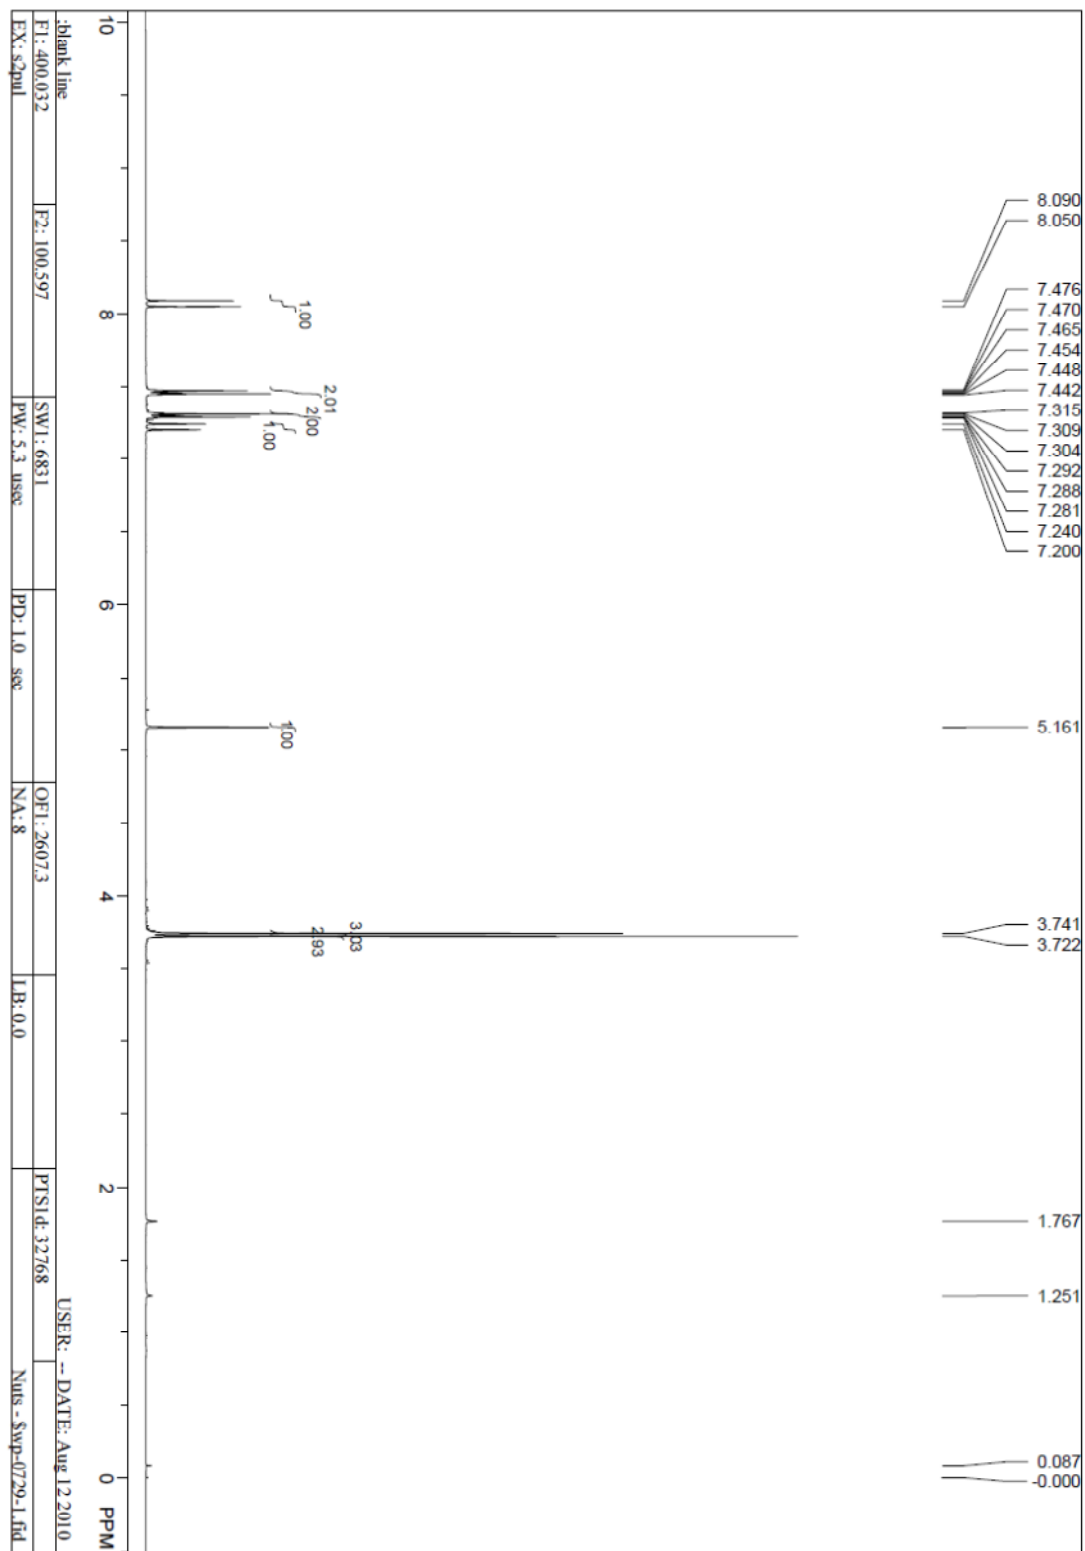

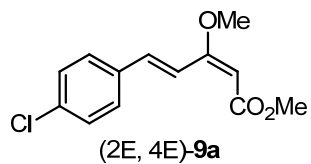

$^{13}\text{C}$  NMR (100 MHz in  $\text{CDCl}_3$ )

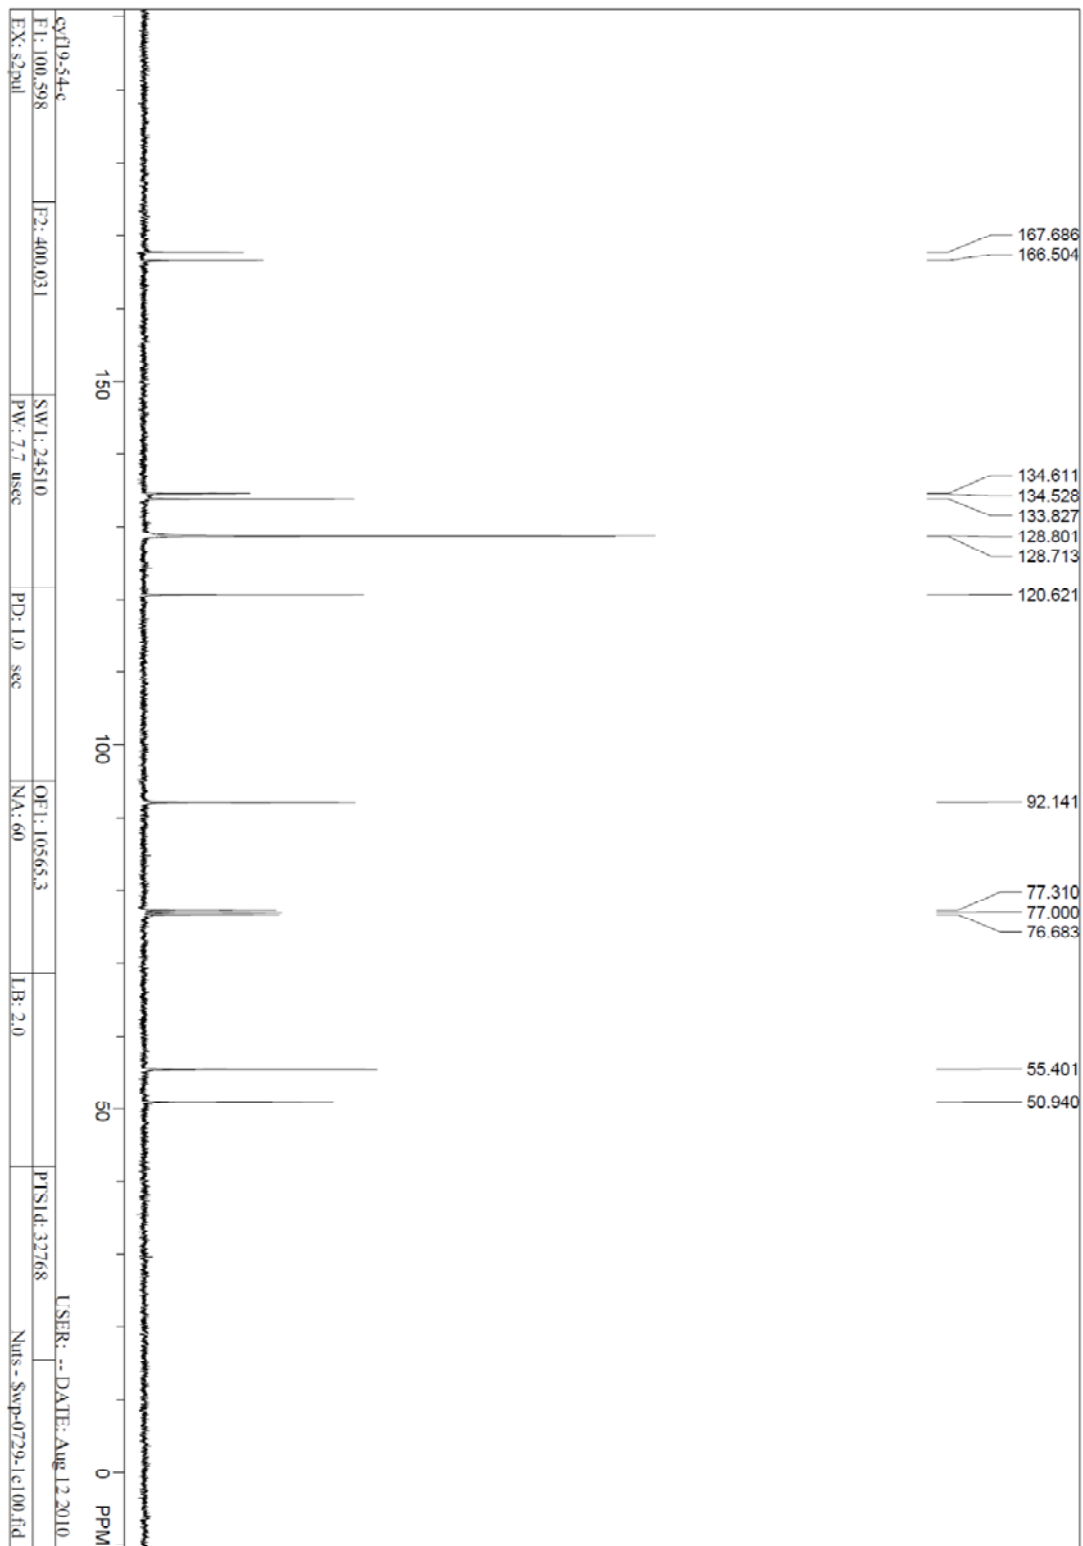

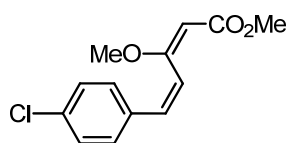

(2E, 4Z)-9a

$^1\text{H}$  NMR (400 M Hz in  $\text{CDCl}_3$ )

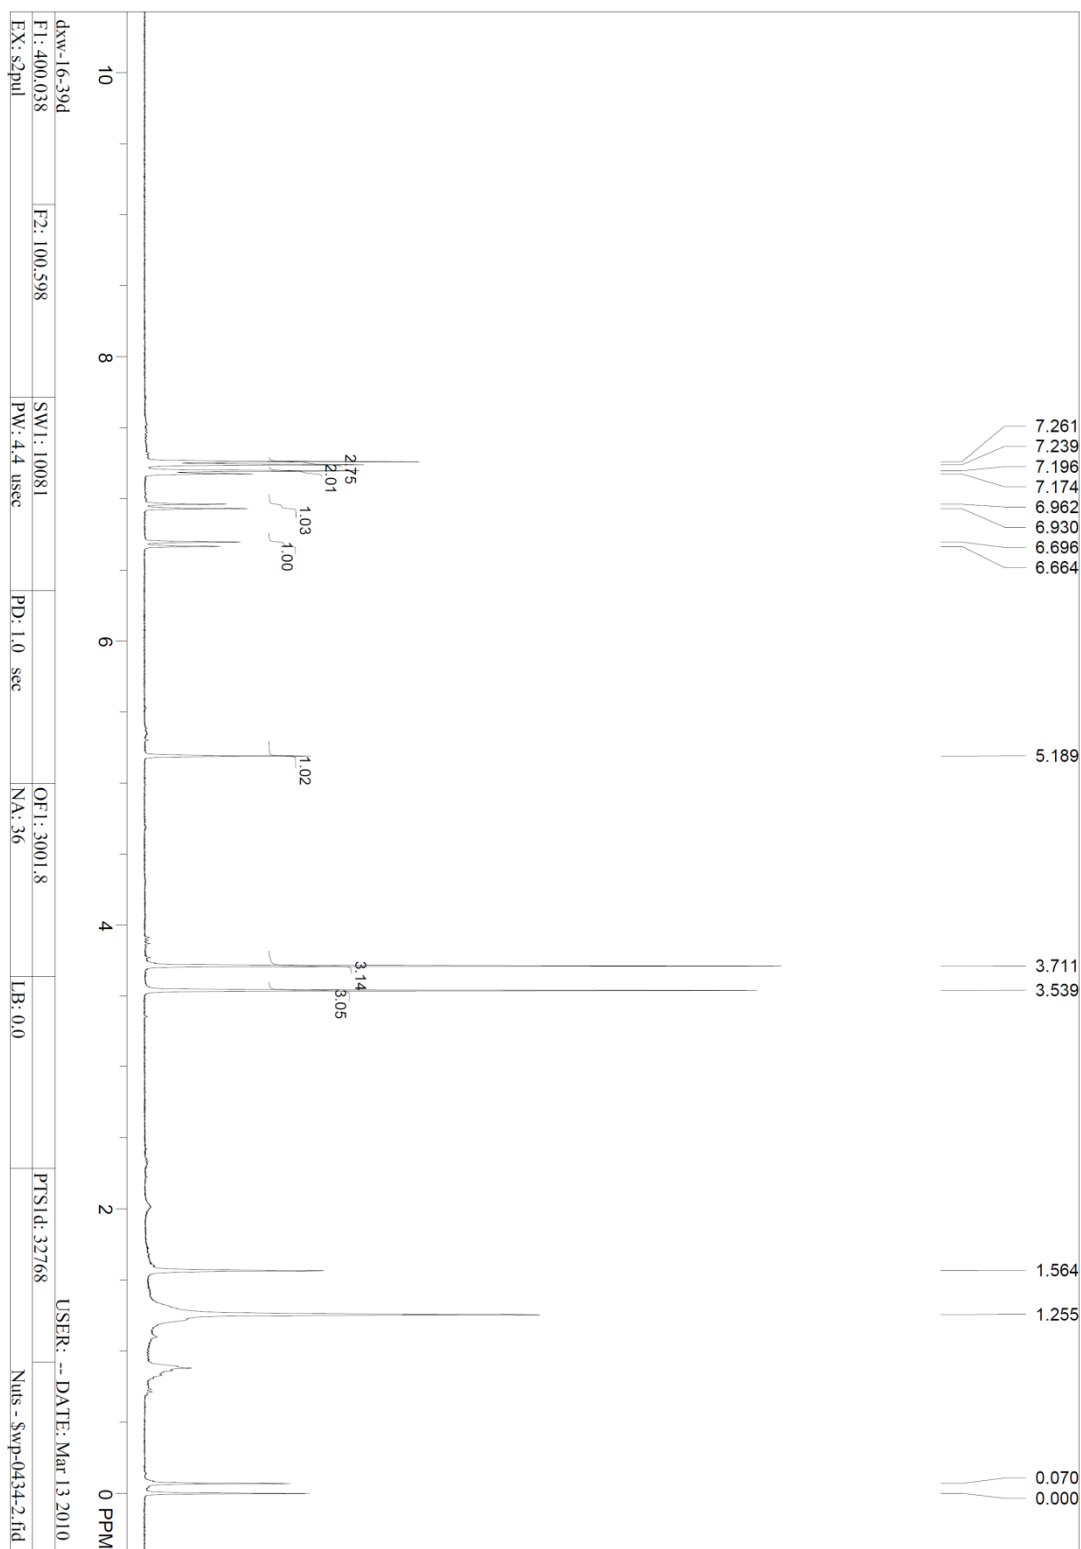

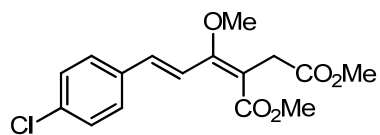

(3E, 5E)-4a

<sup>1</sup>H NMR (400 MHz in CDCl<sub>3</sub>)

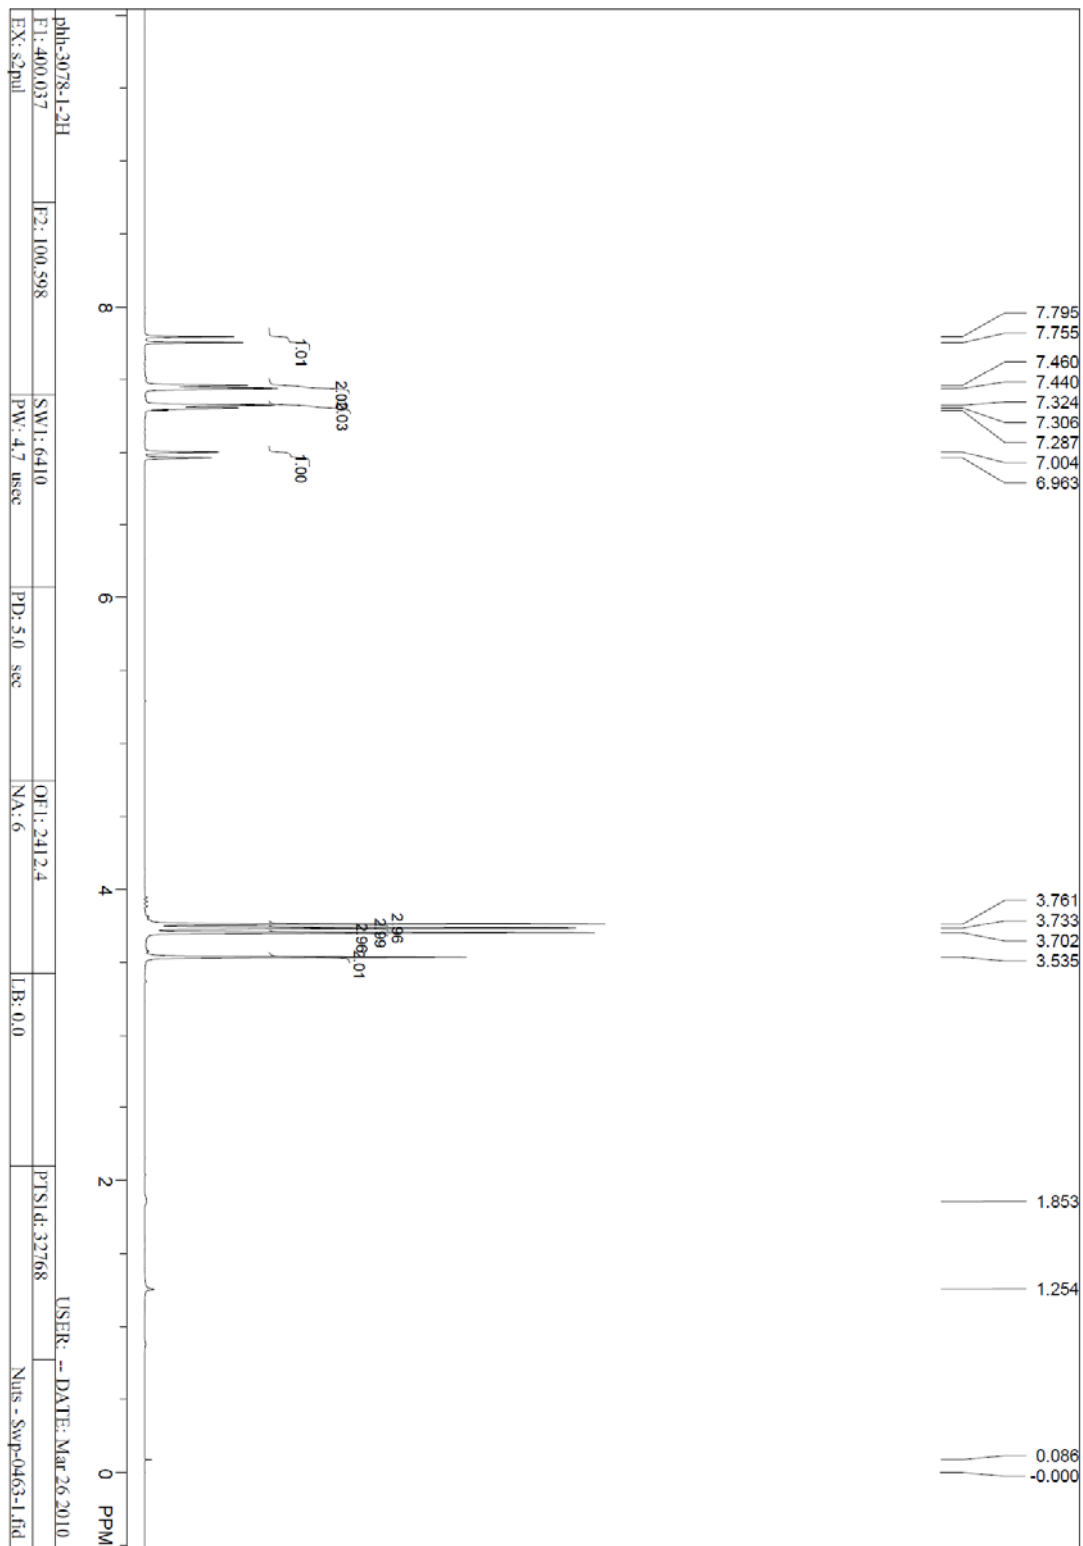



(3E, 5E)-4a

<sup>13</sup>C NMR (100 MHz in CDCl<sub>3</sub>)

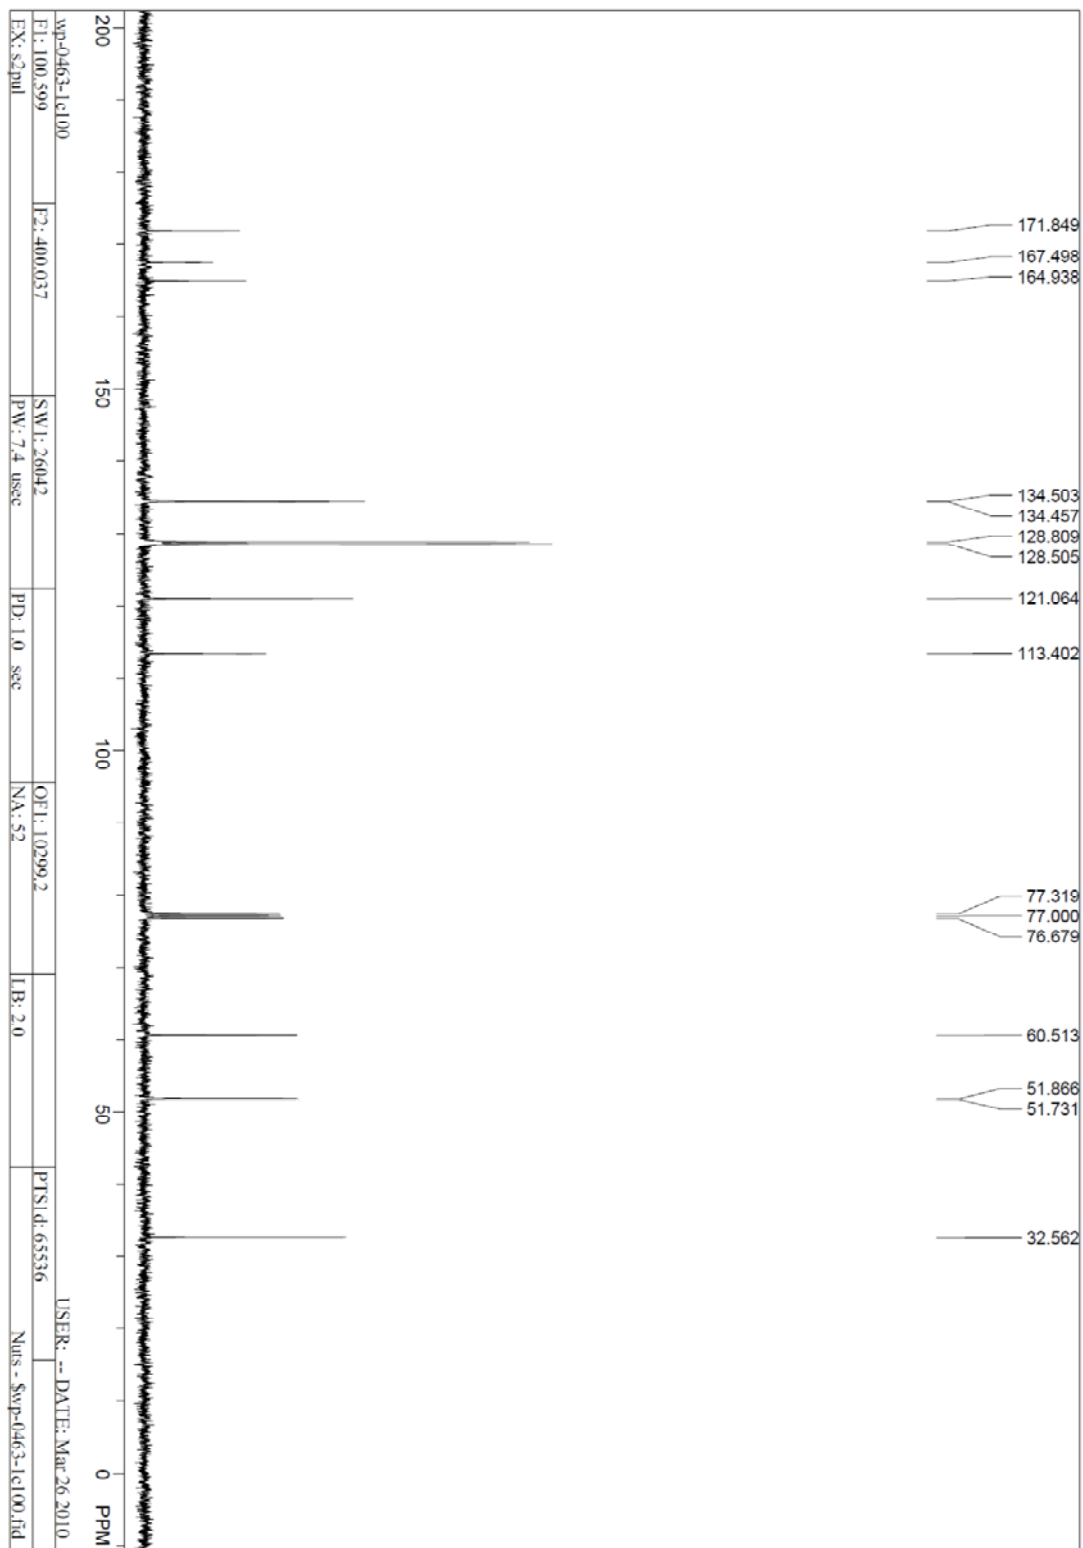

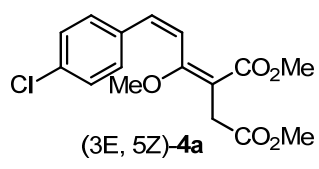

<sup>1</sup>H NMR (400 MHz in CDCl<sub>3</sub>)

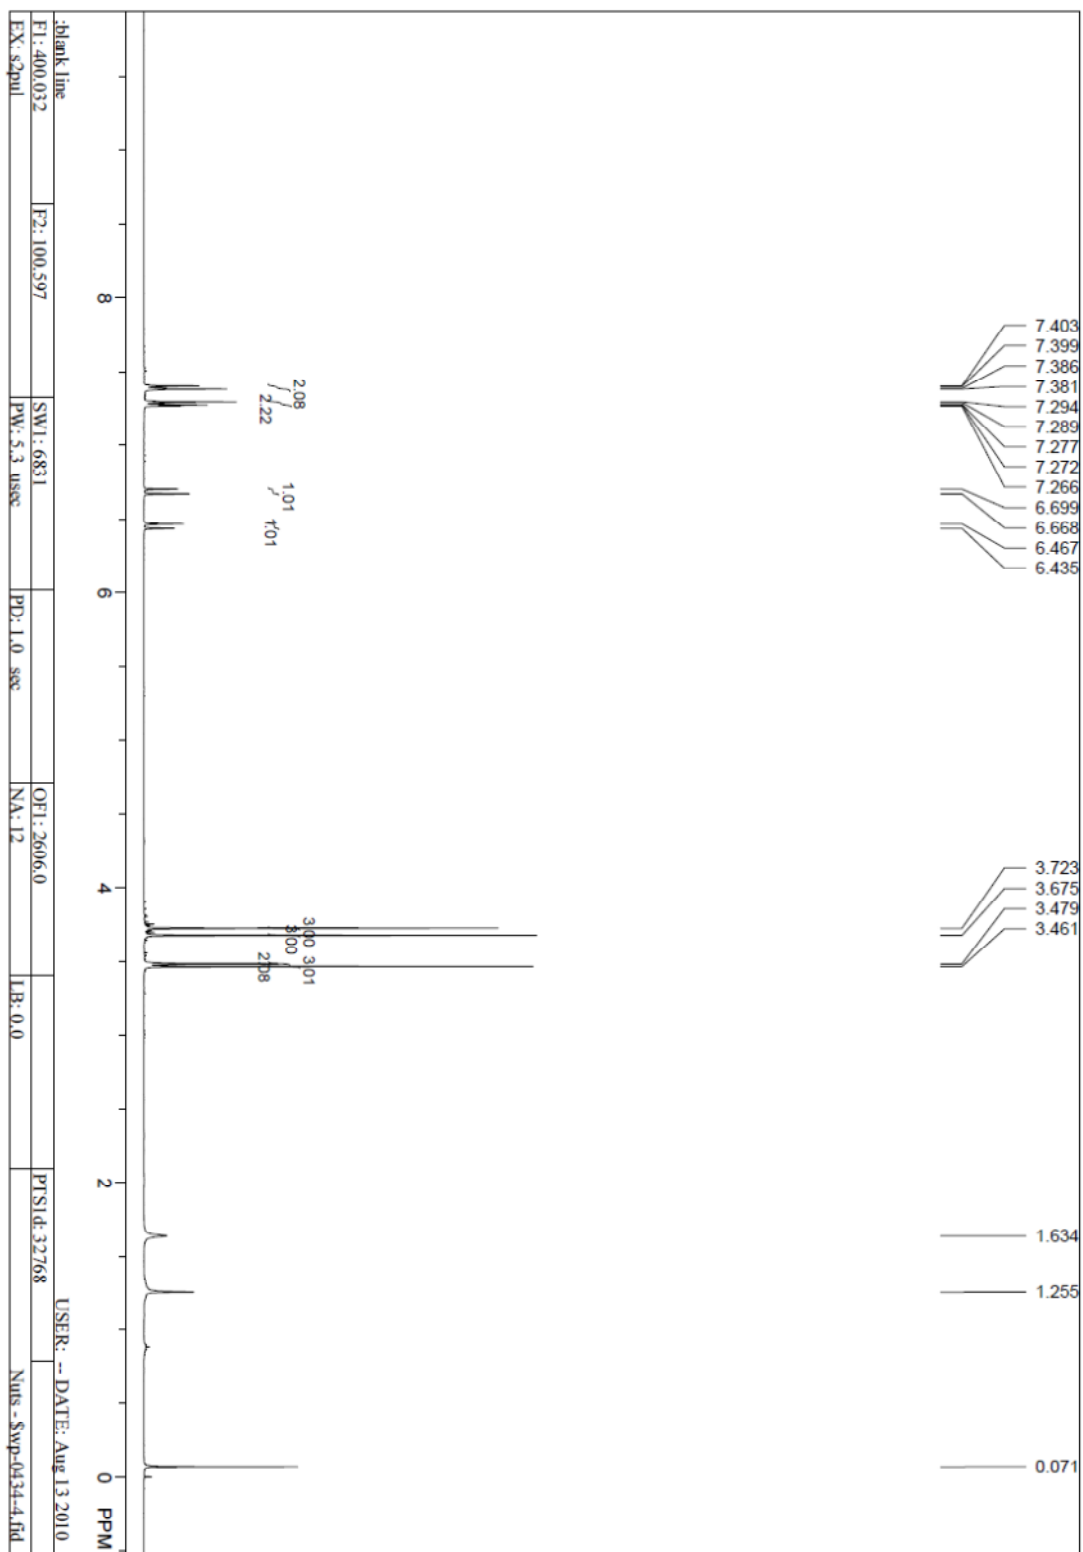

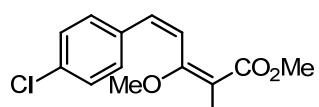

$^{13}\text{C}$  NMR (100 MHz in  $\text{CDCl}_3$ )

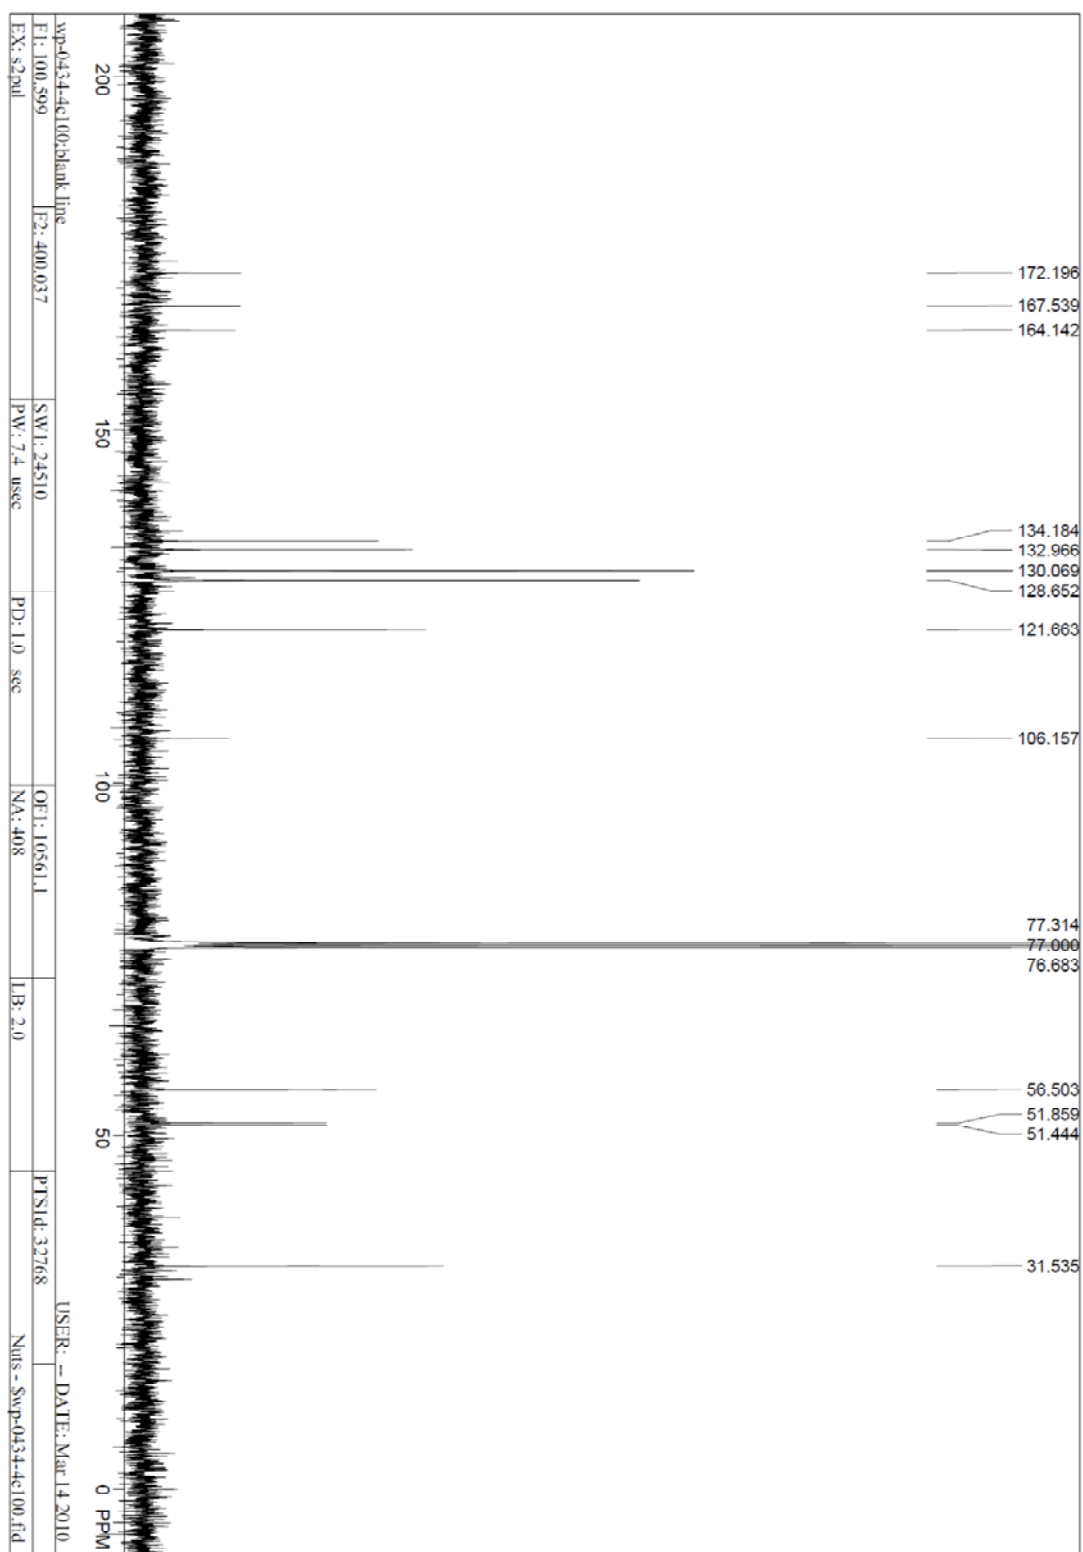

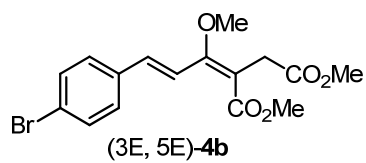

$^1\text{H}$  NMR (400 MHz in  $\text{CDCl}_3$ )

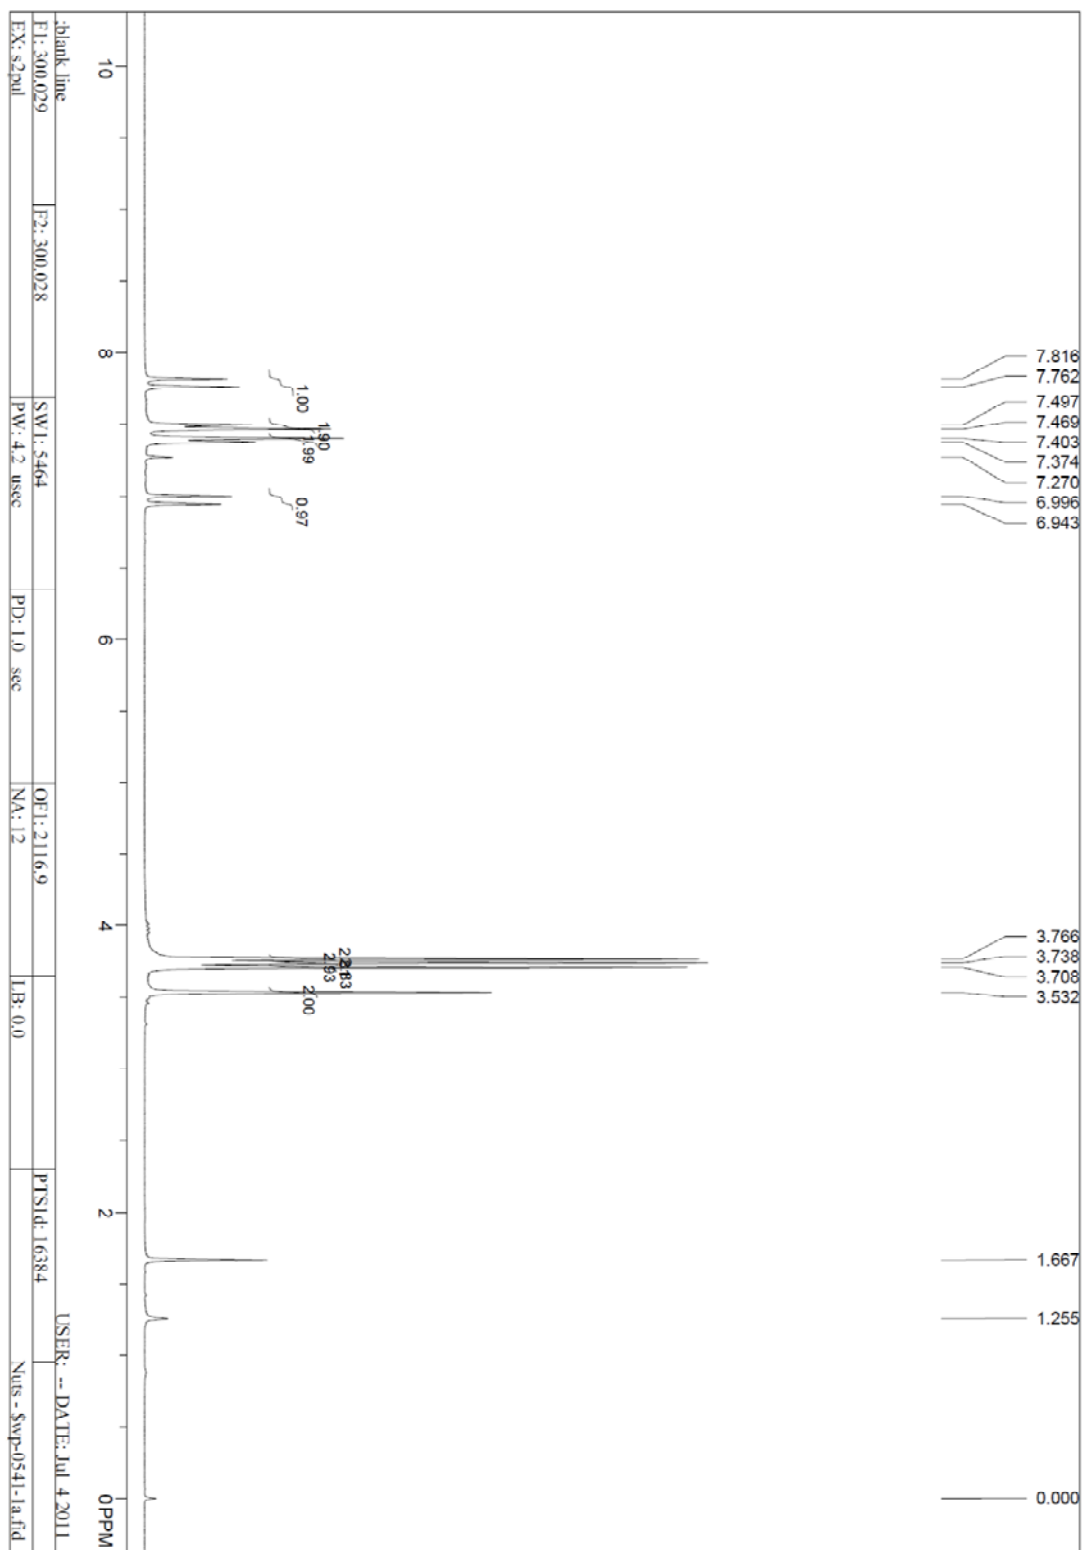





<sup>13</sup>C NMR (100 MHz in CDCl<sub>3</sub>)

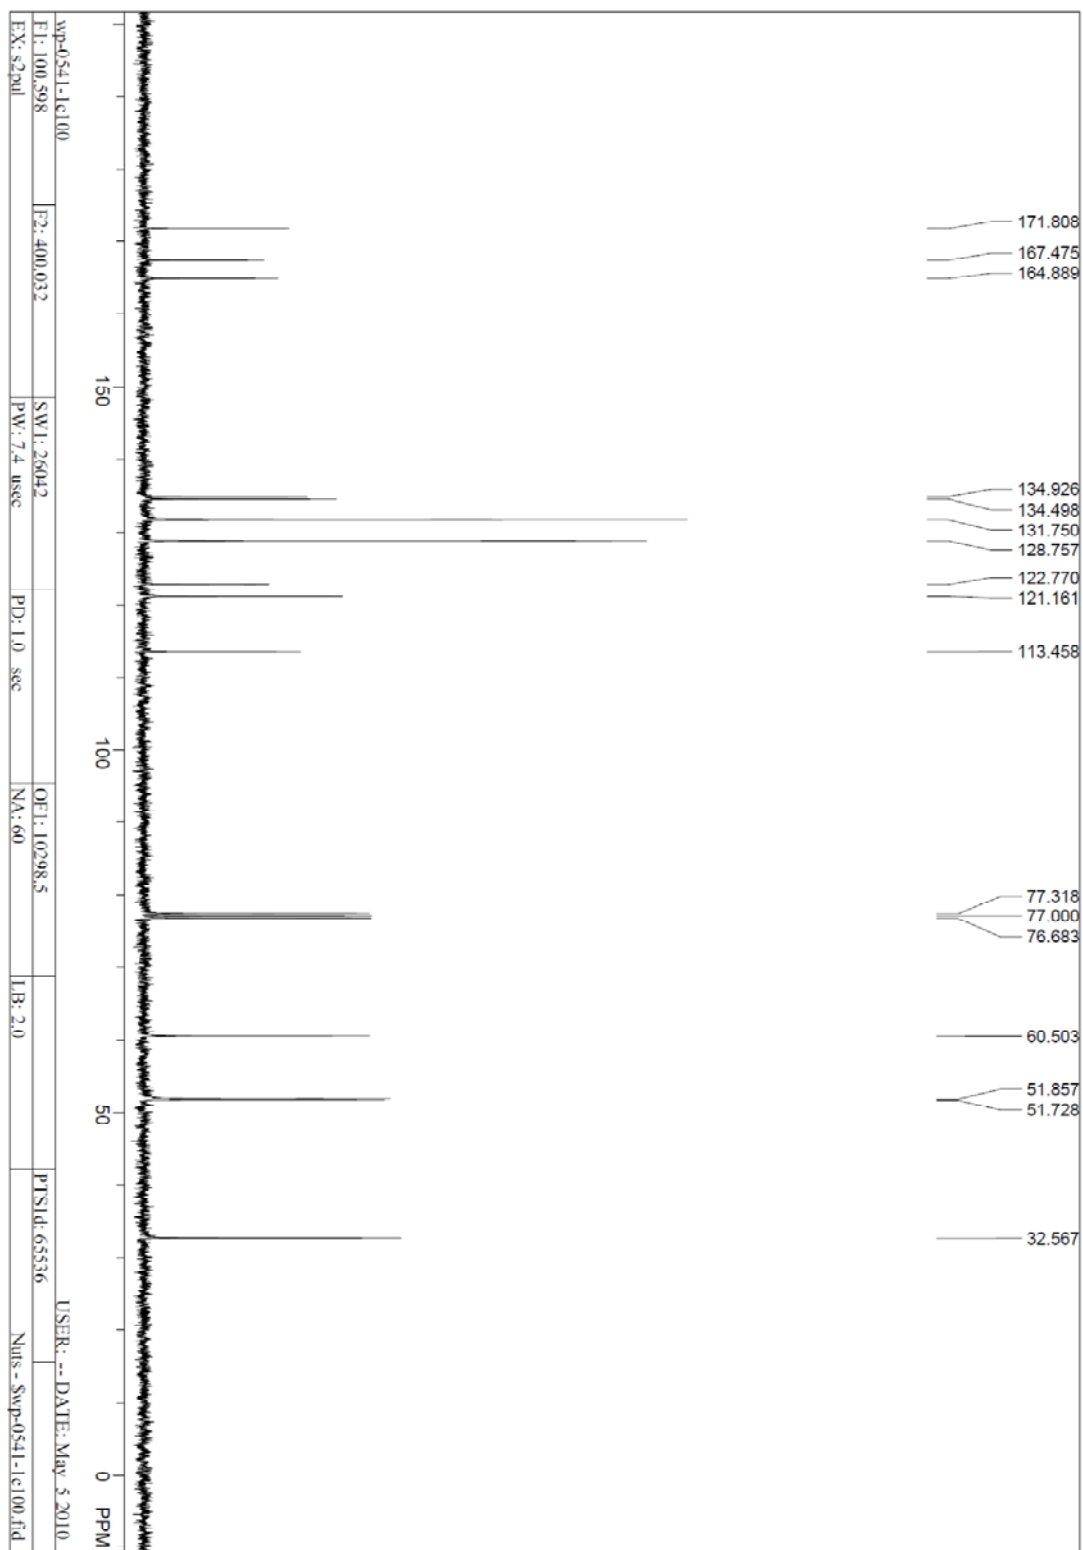

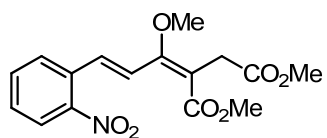

(3E, 5E)-4c

<sup>1</sup>H NMR (400 MHz in CDCl<sub>3</sub>)

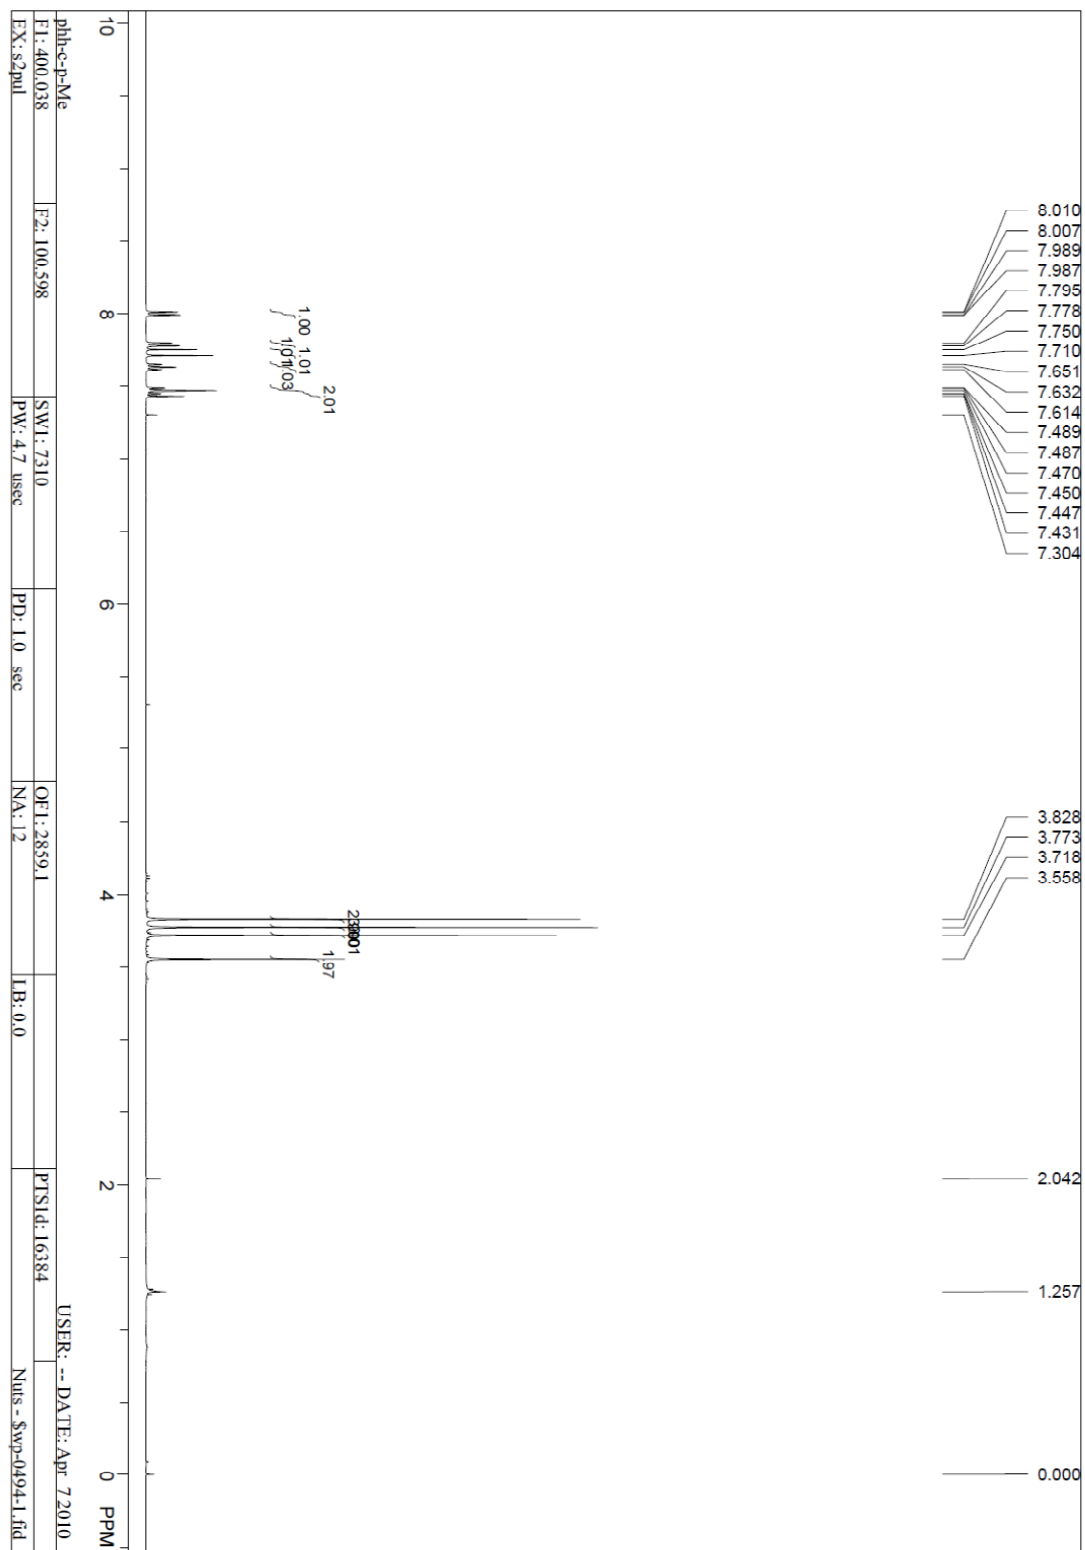



(3E, 5E)-4c

<sup>13</sup>C NMR (100 M Hz in CDCl<sub>3</sub>)

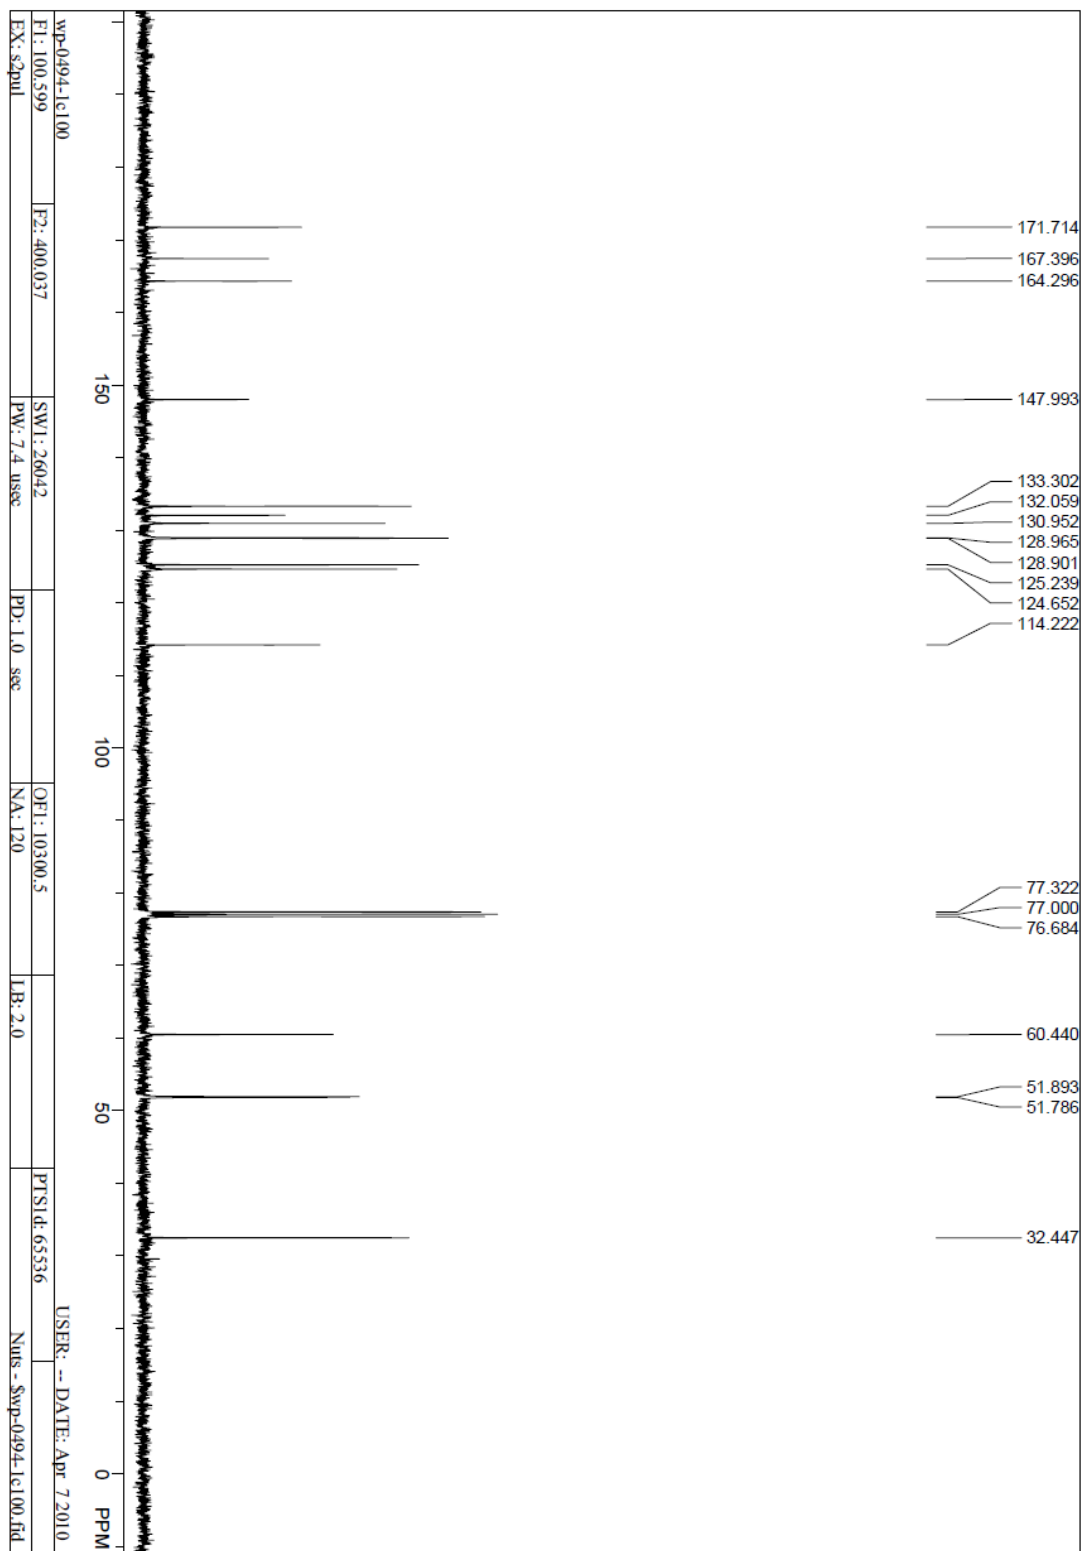

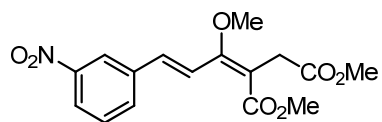

(3E, 5E)-4d

$^1\text{H NMR}$  (400 M Hz in  $\text{CDCl}_3$ )

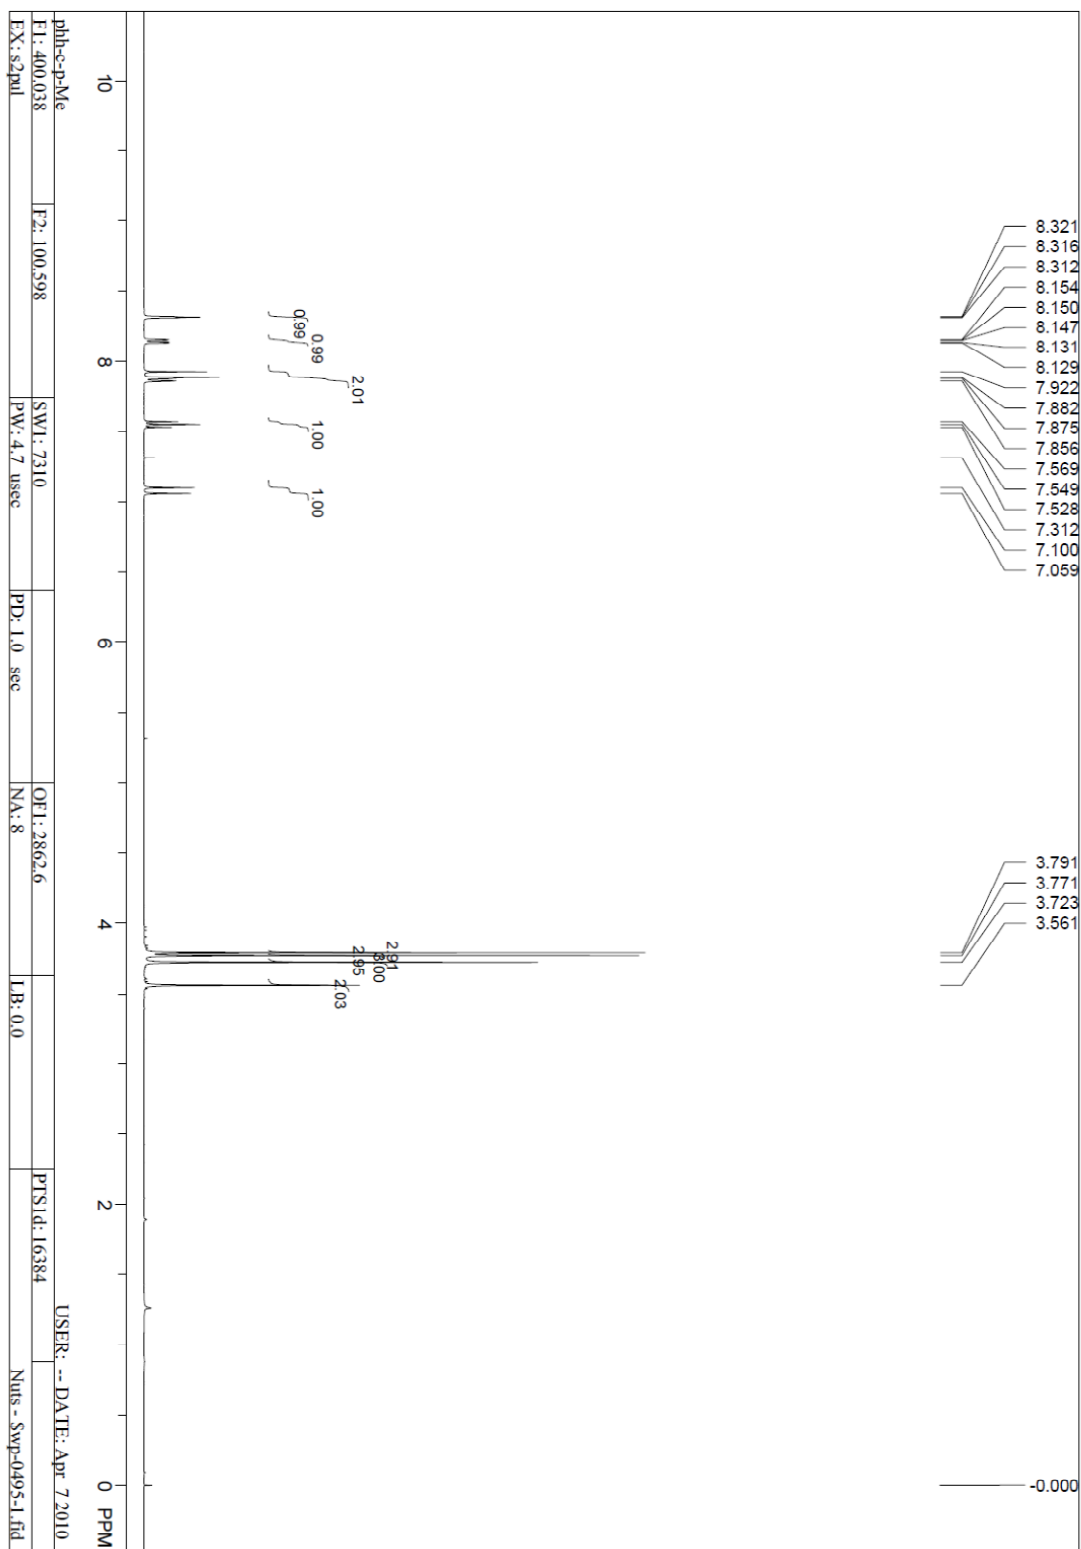



(3E, 5E)-4d

$^{13}\text{C}$  NMR (100 M Hz in  $\text{CDCl}_3$ )

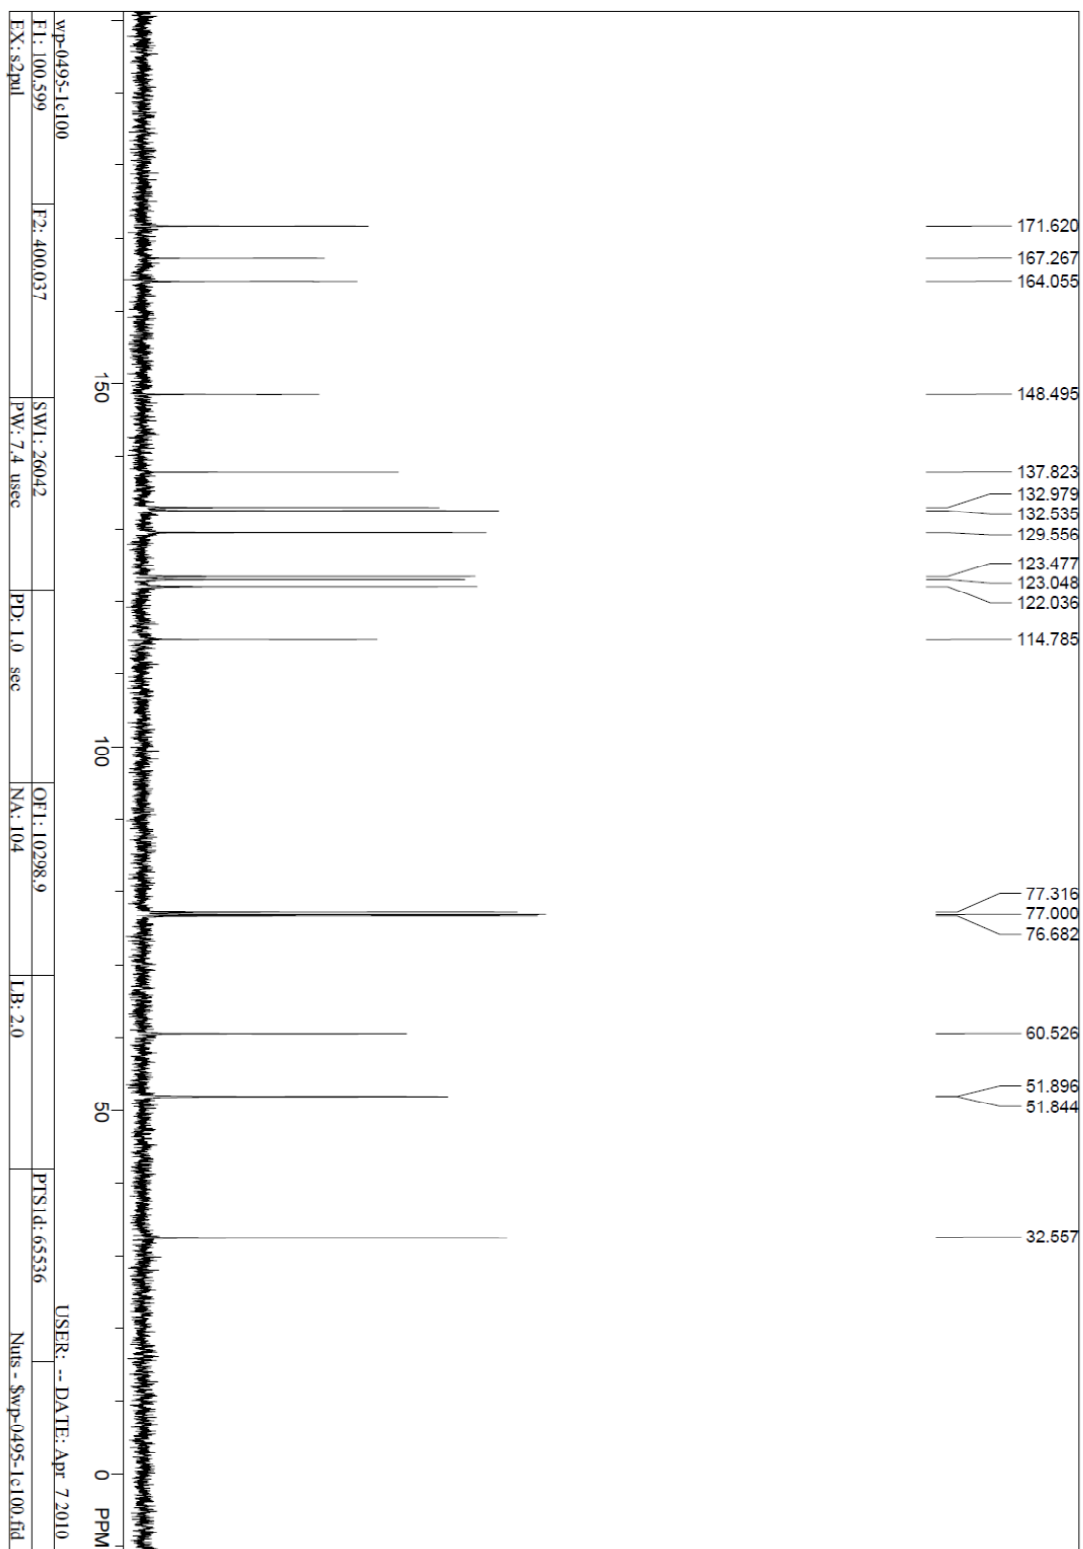

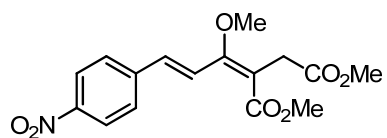

(3E, 5E)-4e

<sup>1</sup>H NMR (400 MHz in CDCl<sub>3</sub>)

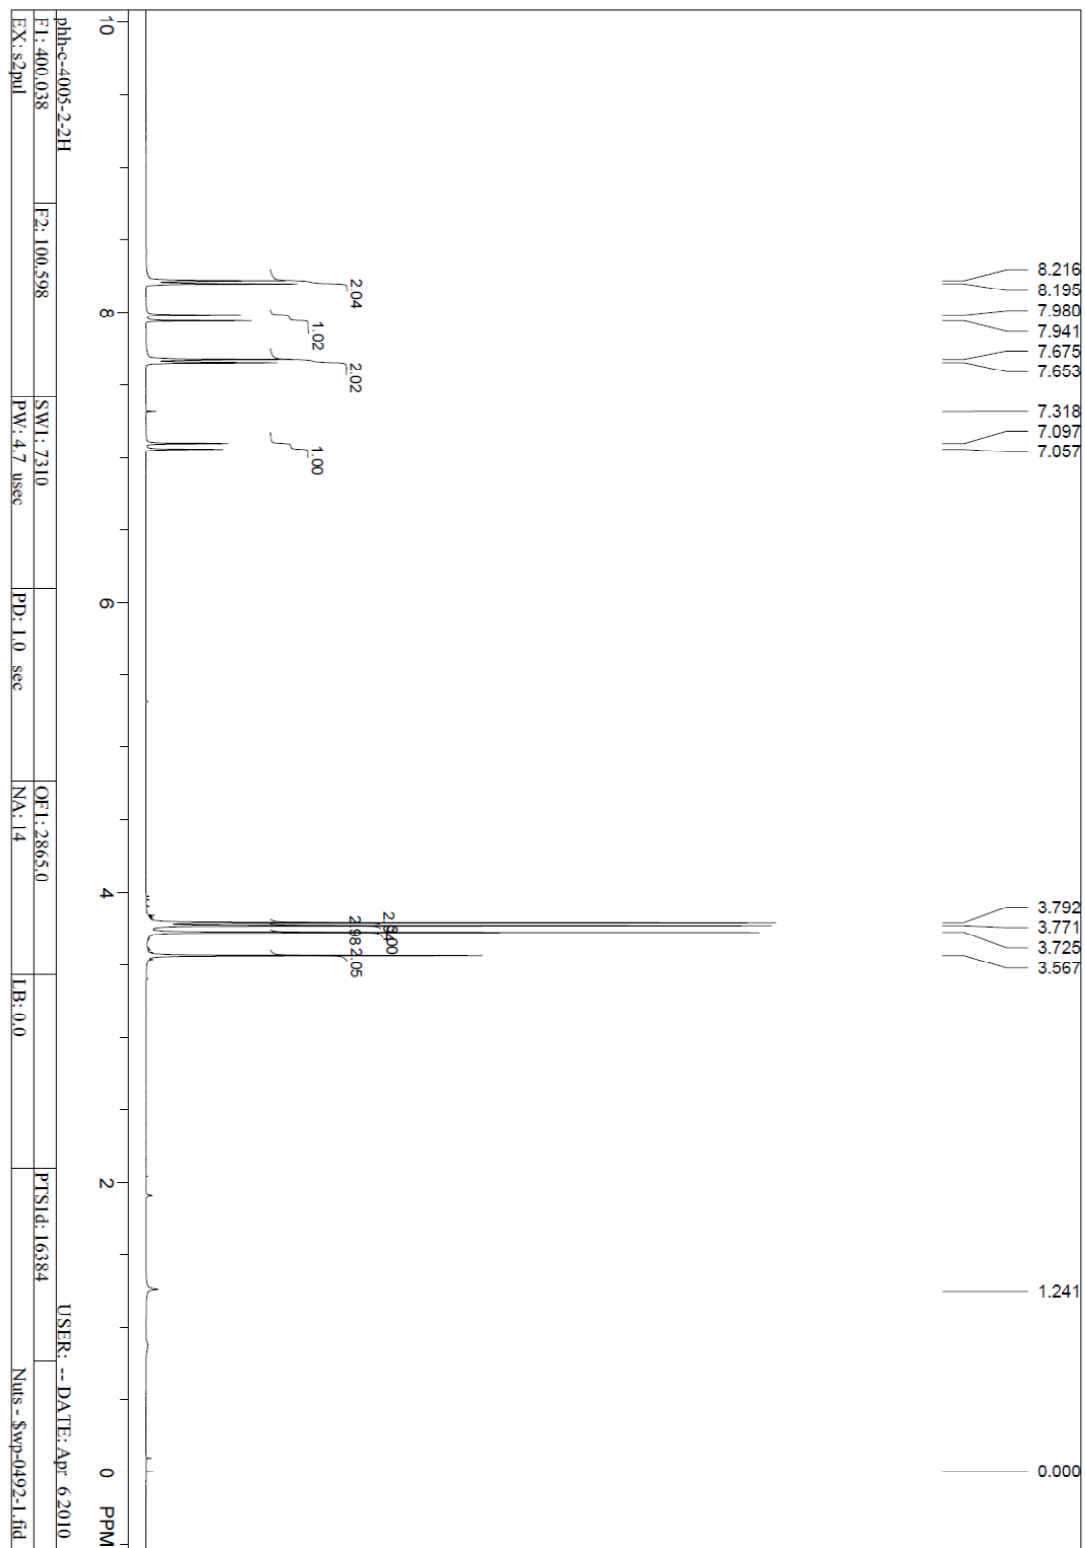



(3E, 5E)-4e

<sup>13</sup>C NMR (100 M Hz in CDCl<sub>3</sub>)

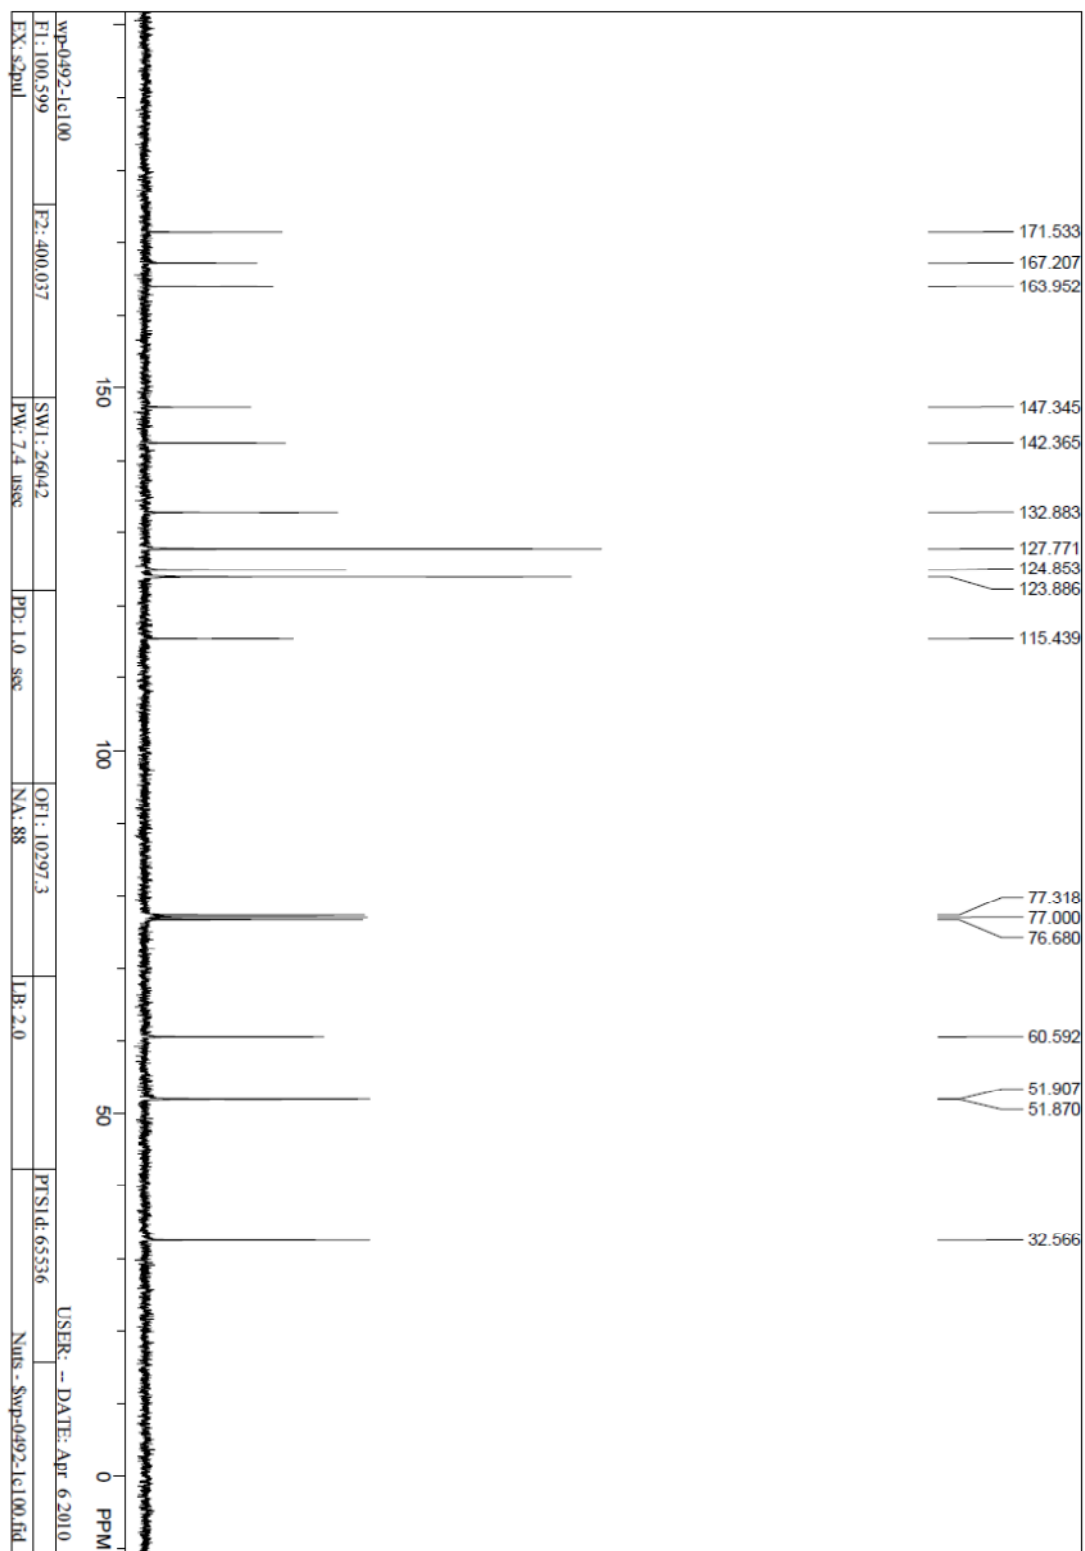

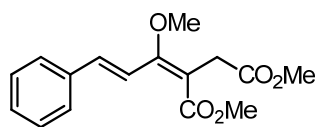

(3E, 5E)-4f

$^1\text{H NMR}$  (400 M Hz in  $\text{CDCl}_3$ )

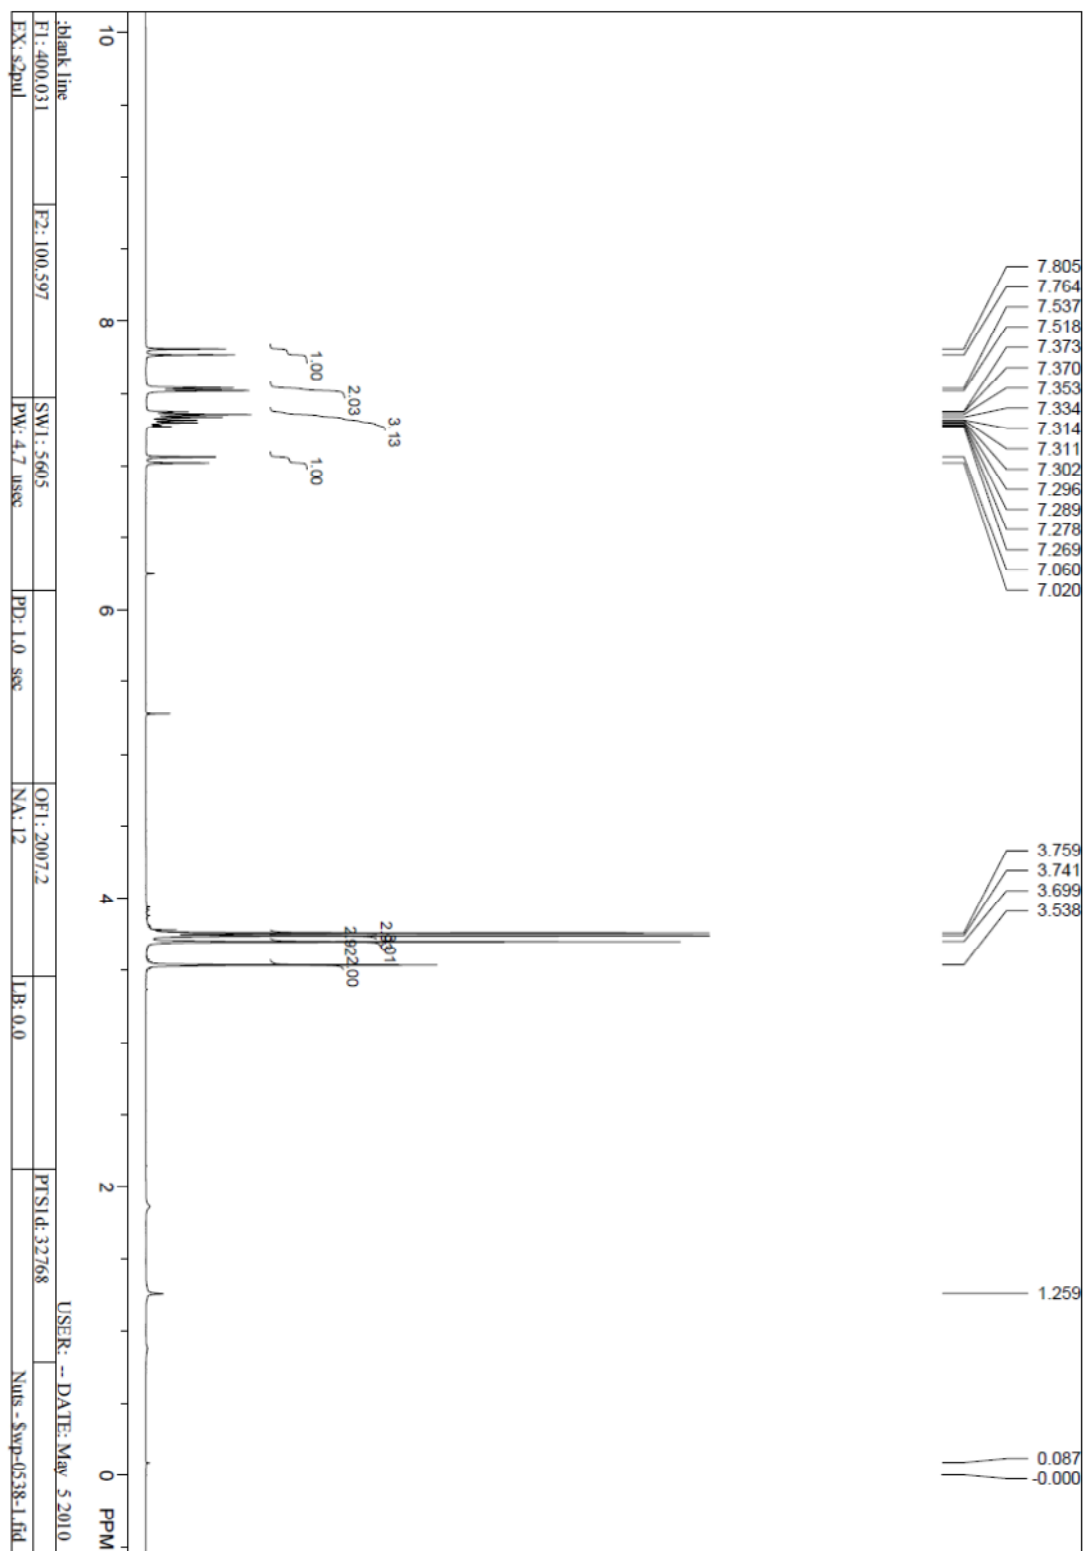





(3E, 5E)-4f

$^{13}\text{C}$  NMR (100 MHz in  $\text{CDCl}_3$ )

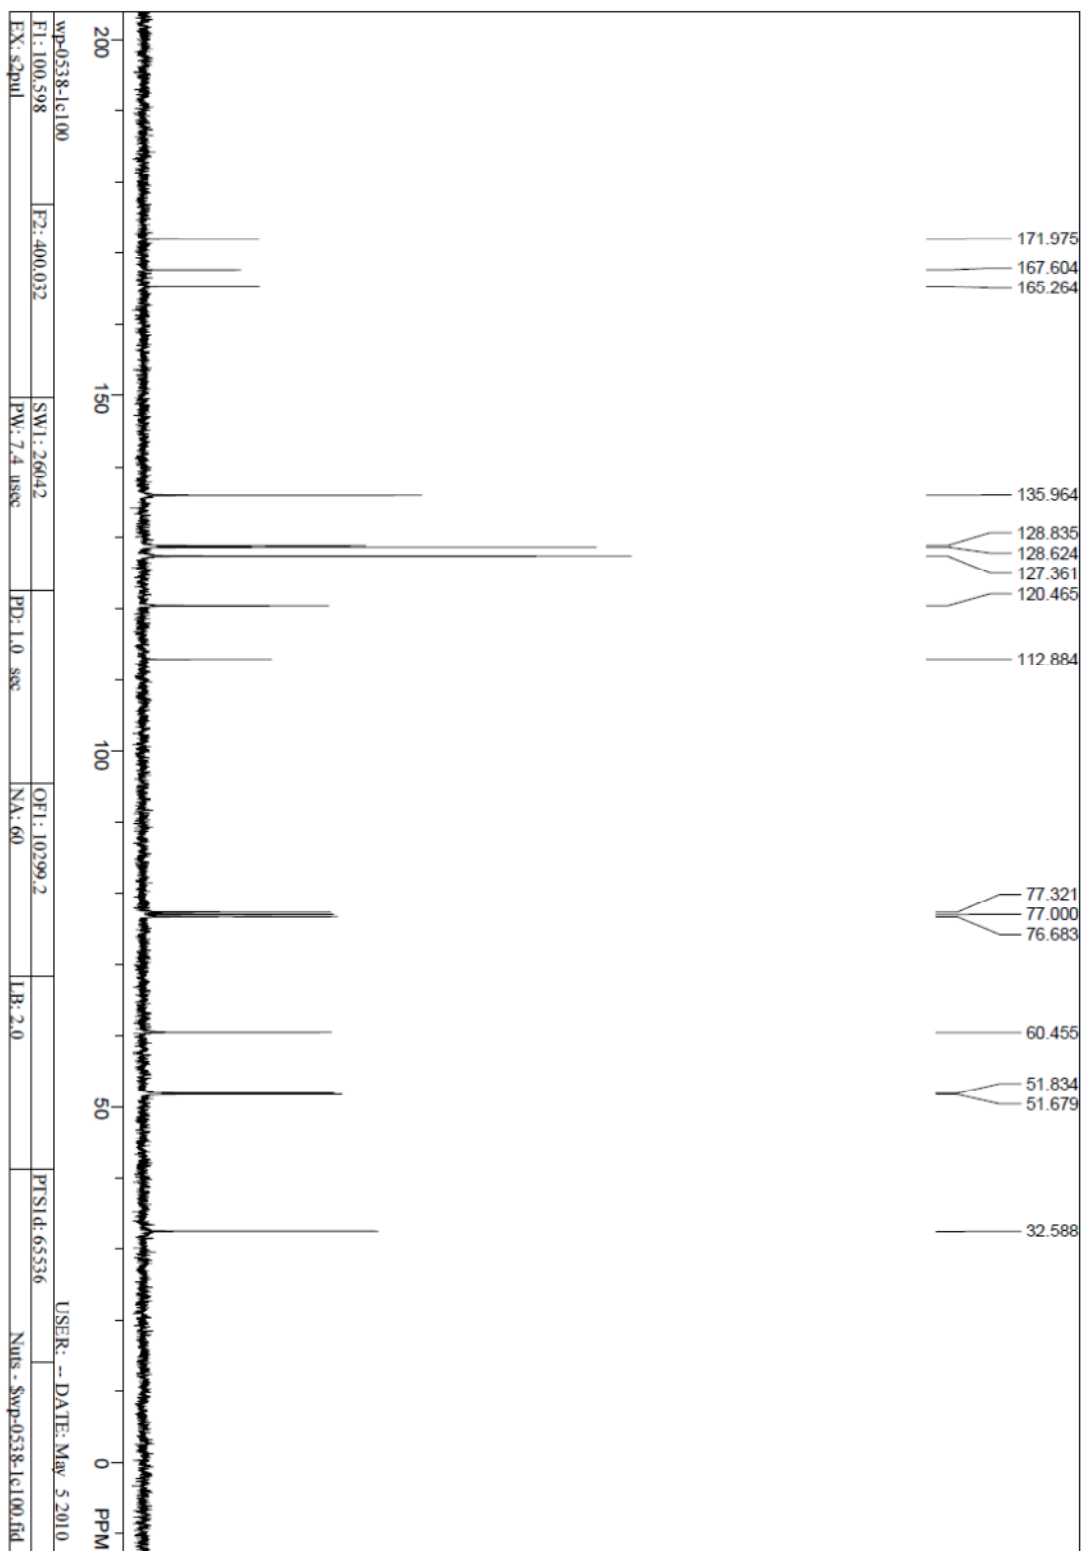



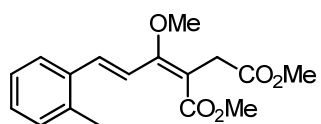

(3E, 5E)-4g

$^{13}\text{C}$  NMR (100 MHz in  $\text{CDCl}_3$ )

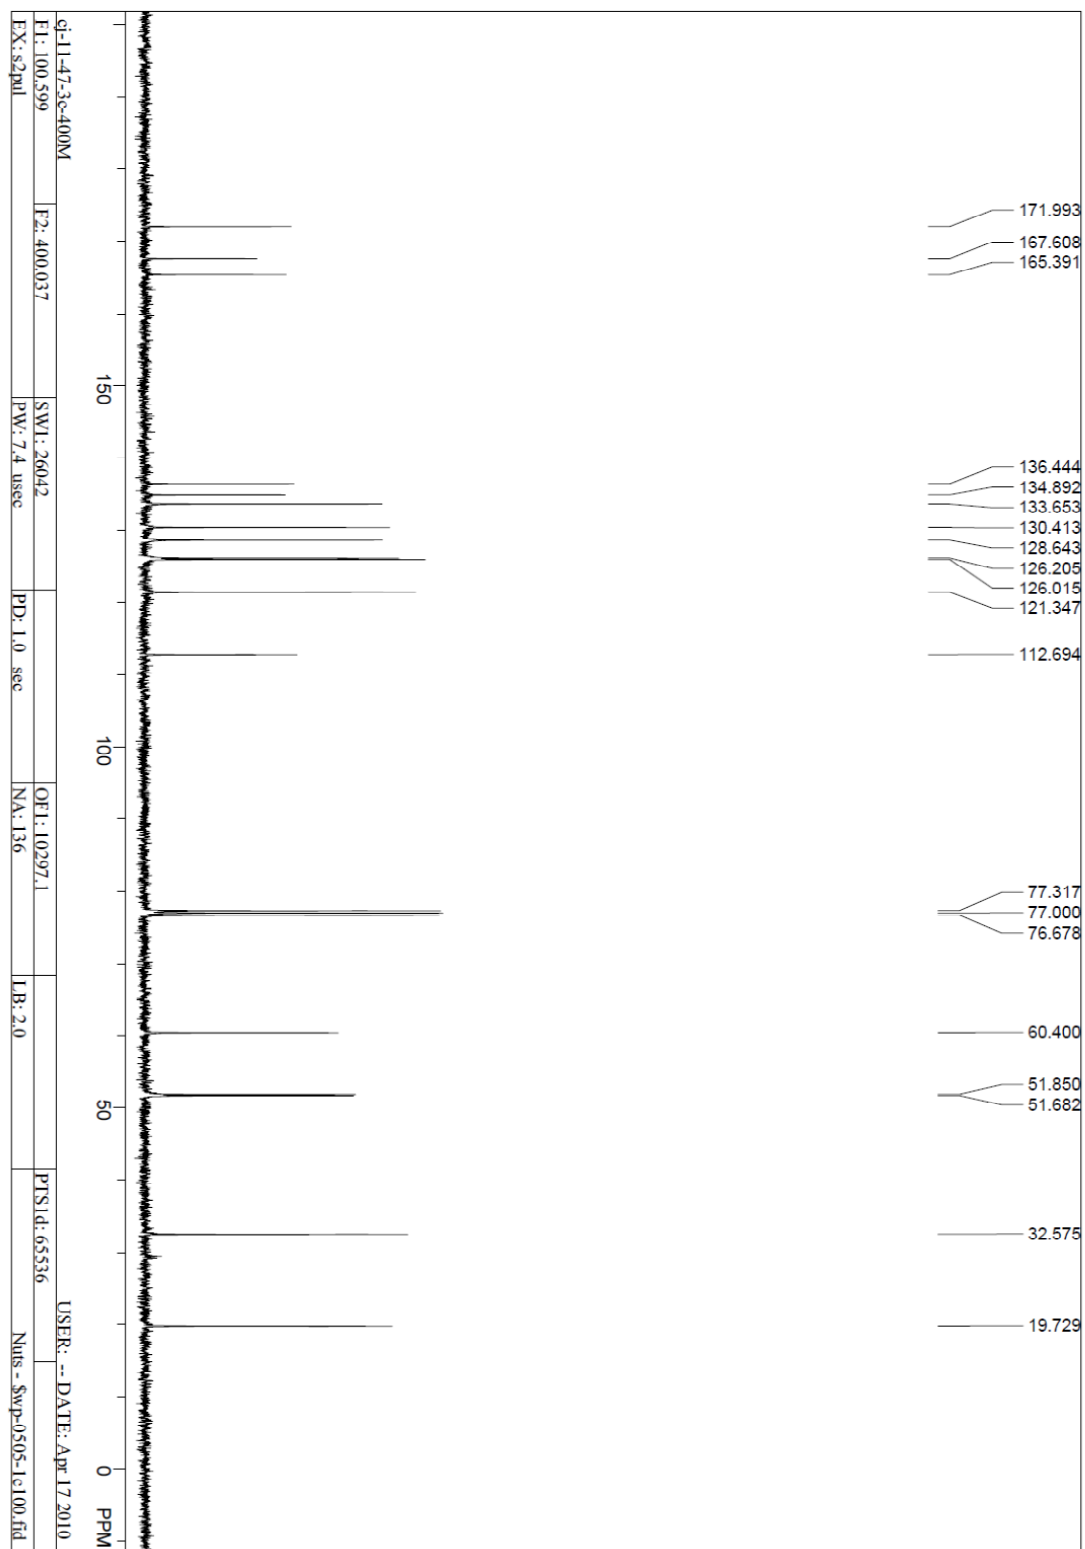

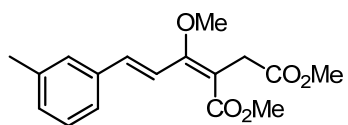

(3E, 5E)-4h

$^1\text{H NMR}$  (400 M Hz in  $\text{CDCl}_3$ )

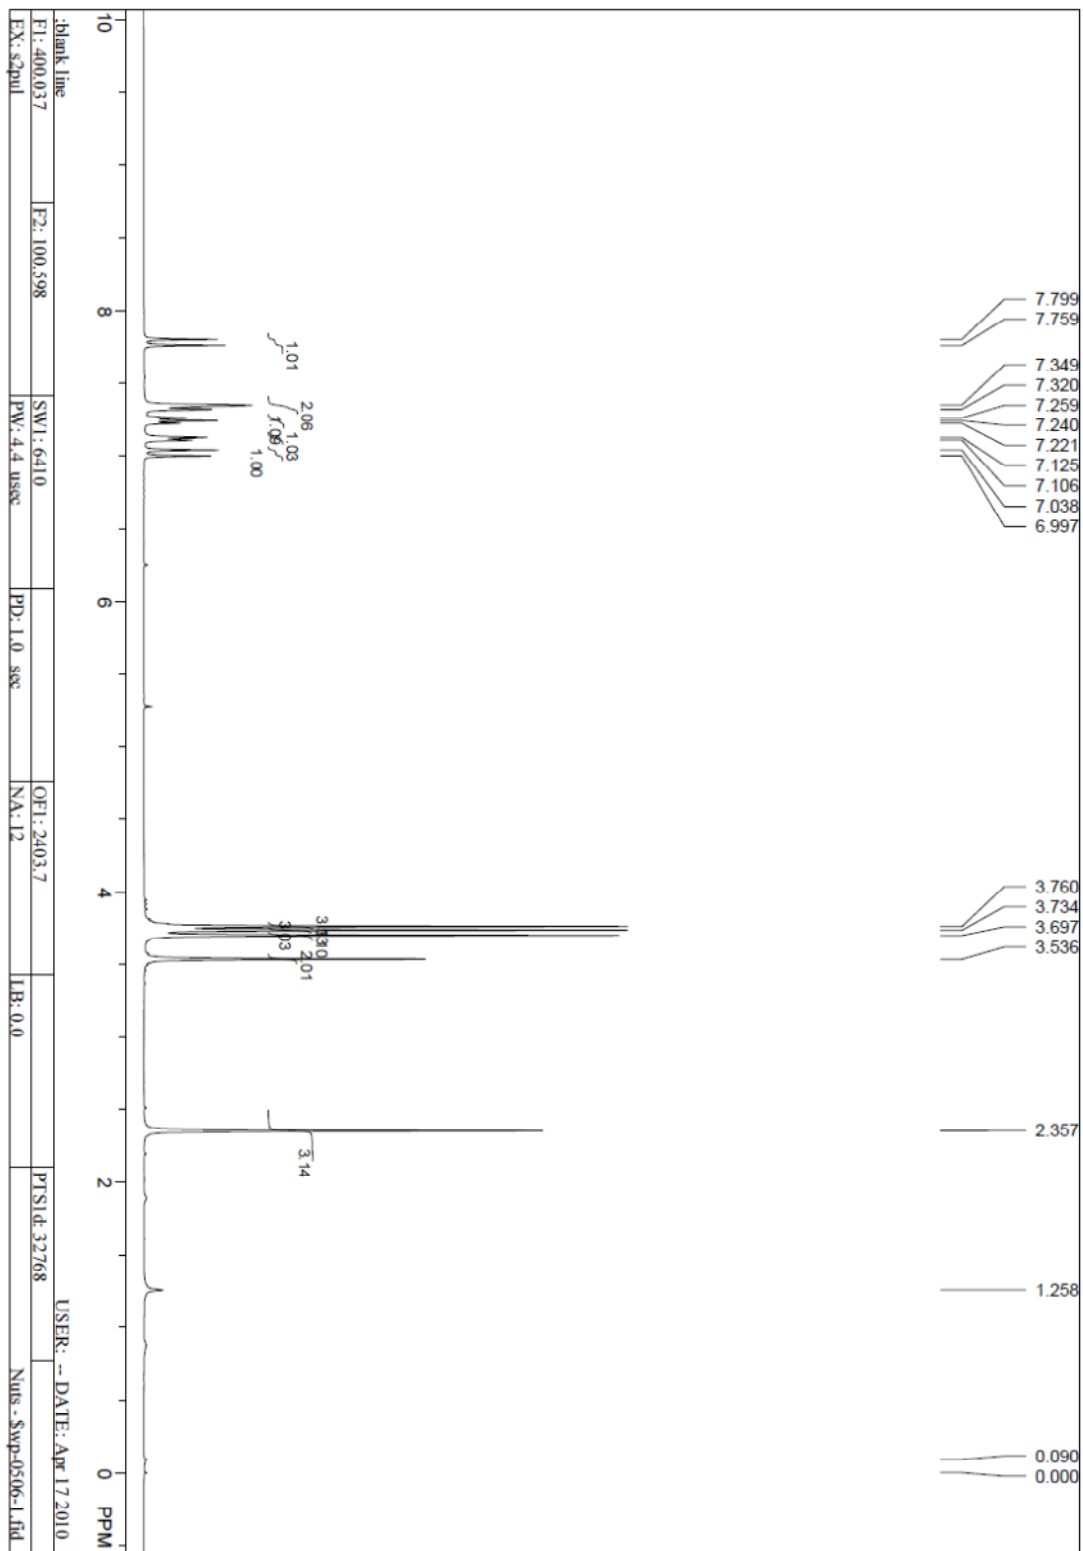

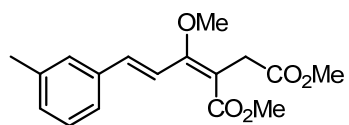

(3E, 5E)-4h

<sup>13</sup>C NMR (100 MHz in CDCl<sub>3</sub>)

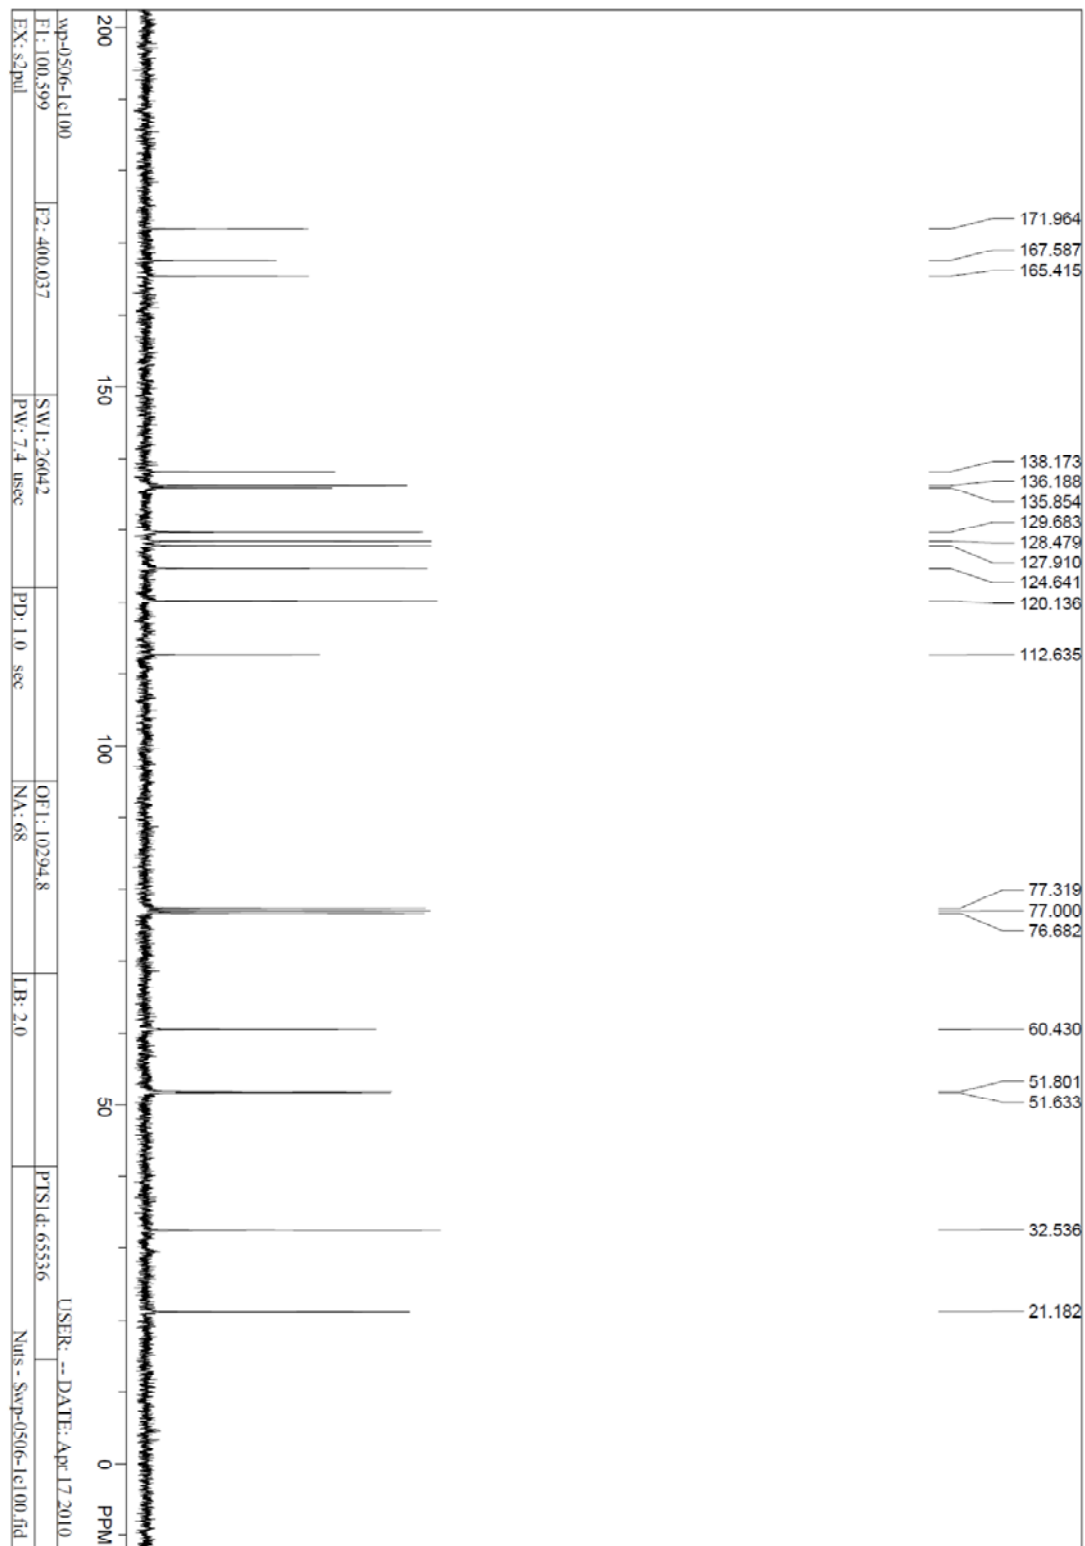



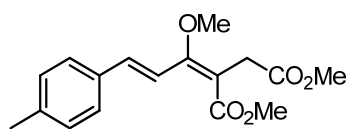

(3E, 5E)-4i

<sup>13</sup>C NMR (100 MHz in CDCl<sub>3</sub>)

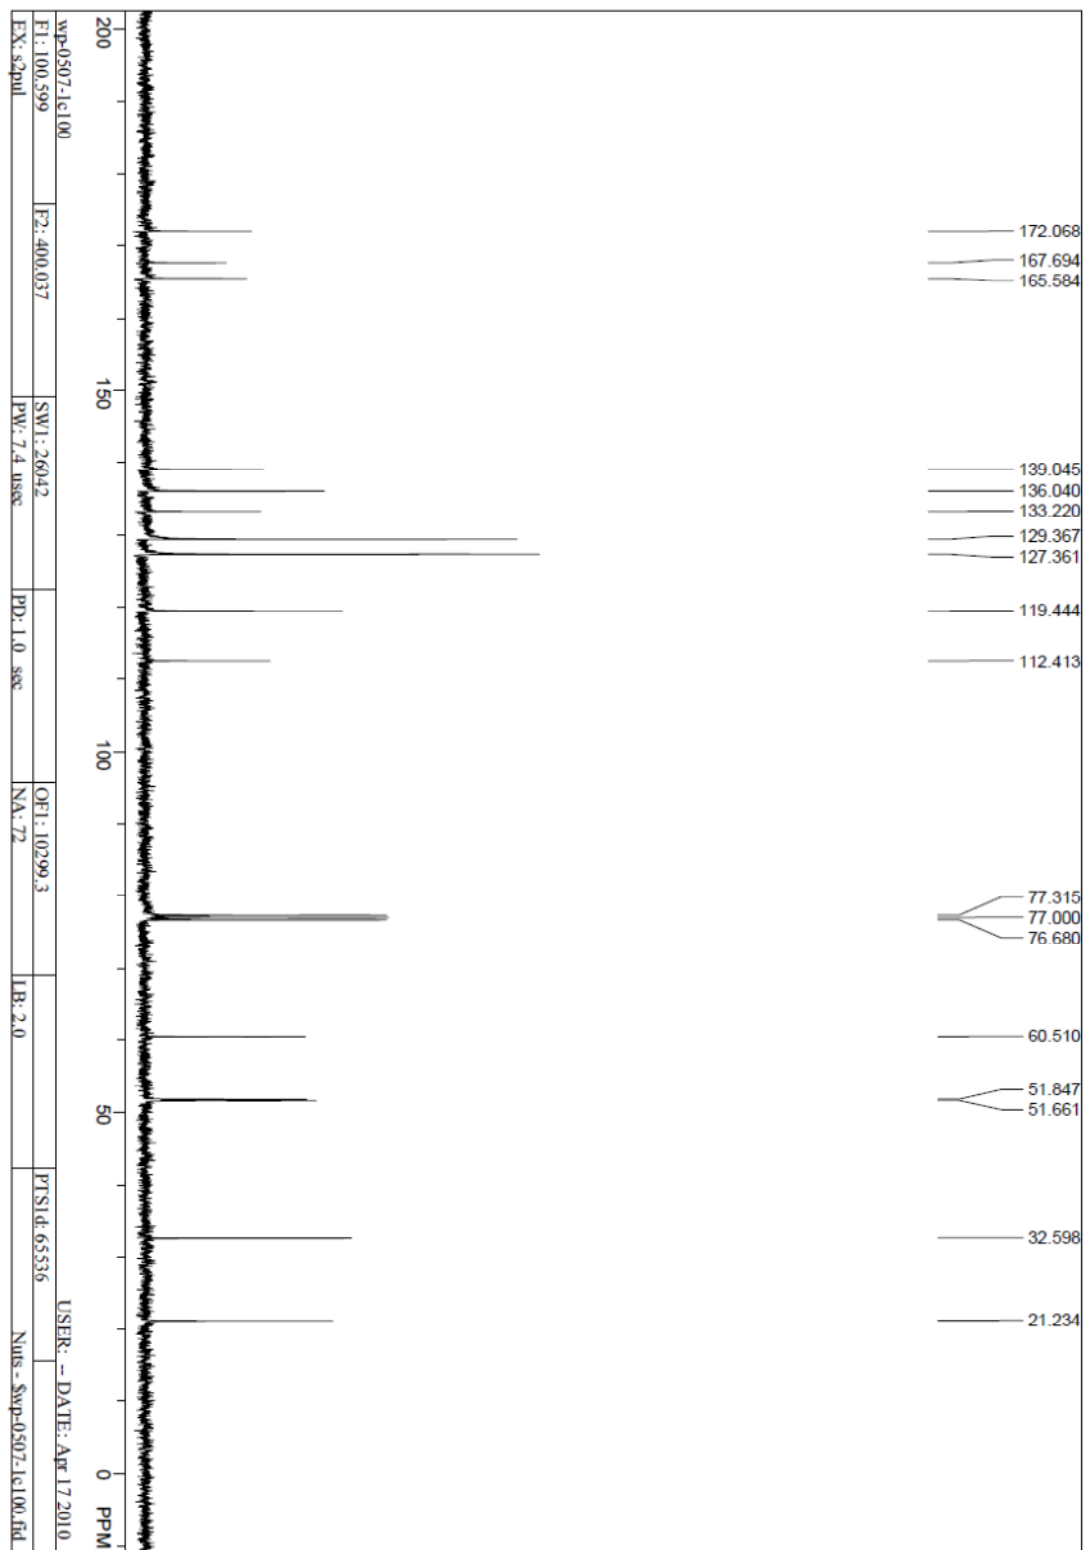

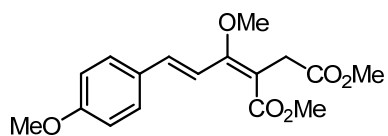

(3E, 5E)-4j

<sup>1</sup>H NMR (400 MHz in CDCl<sub>3</sub>)

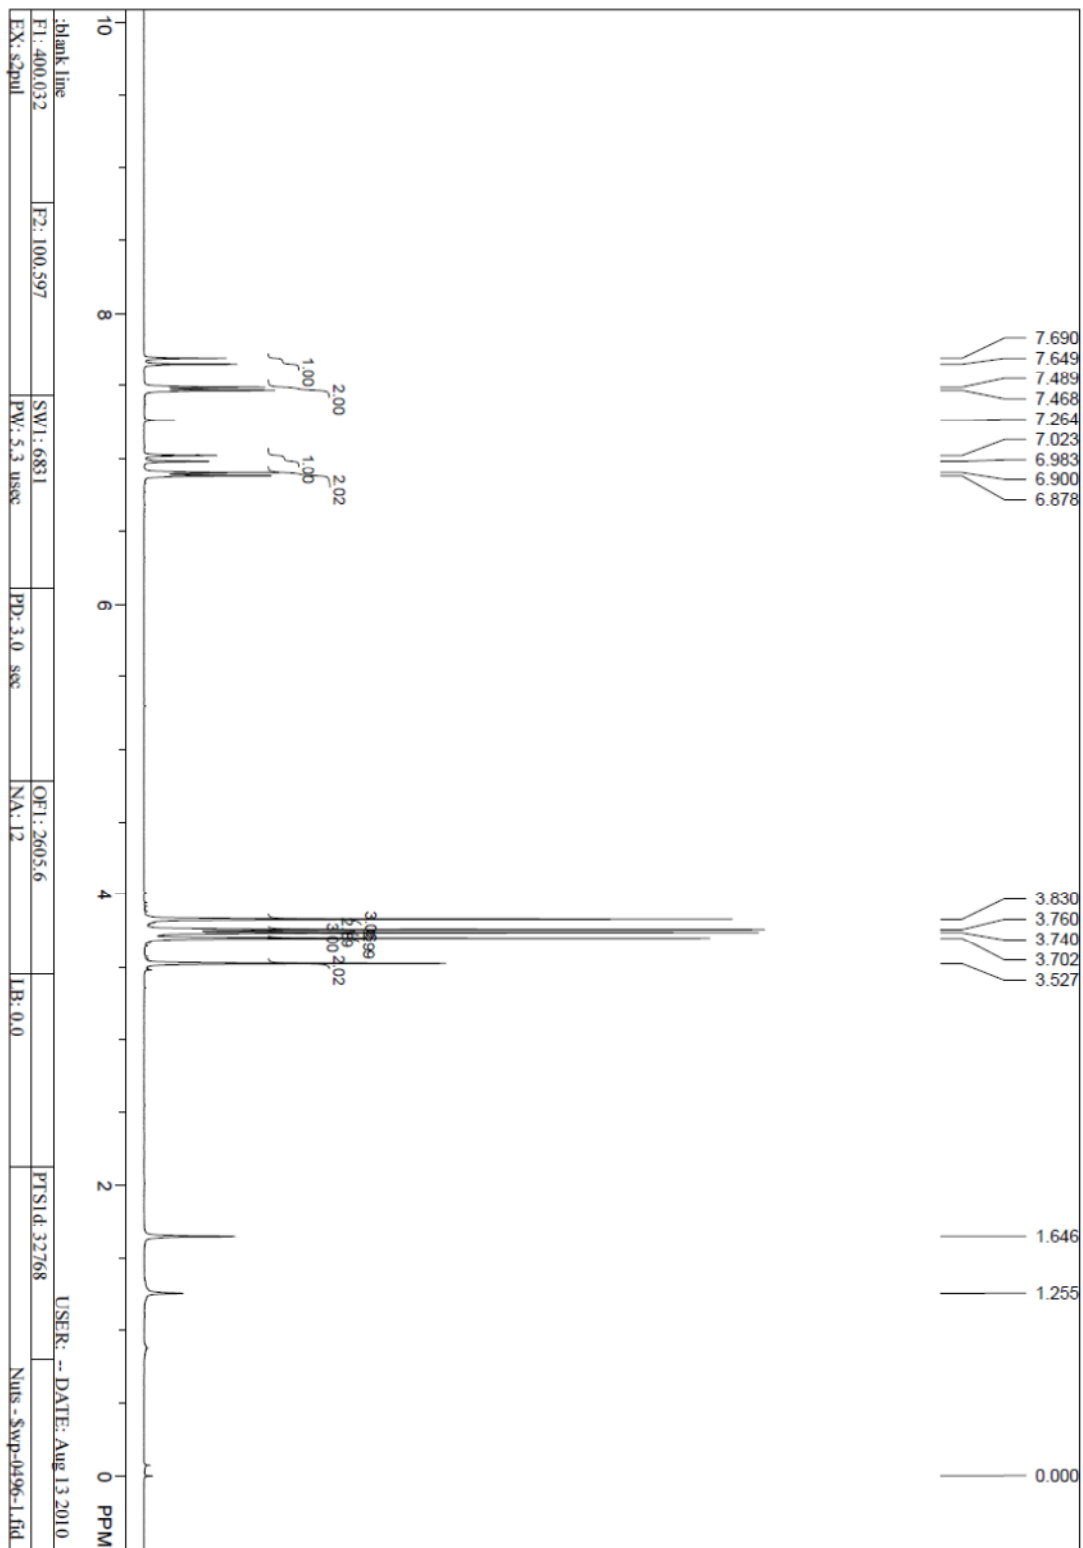





(3E, 5E)-4j

$^{13}\text{C}$  NMR (100 MHz in  $\text{CDCl}_3$ )

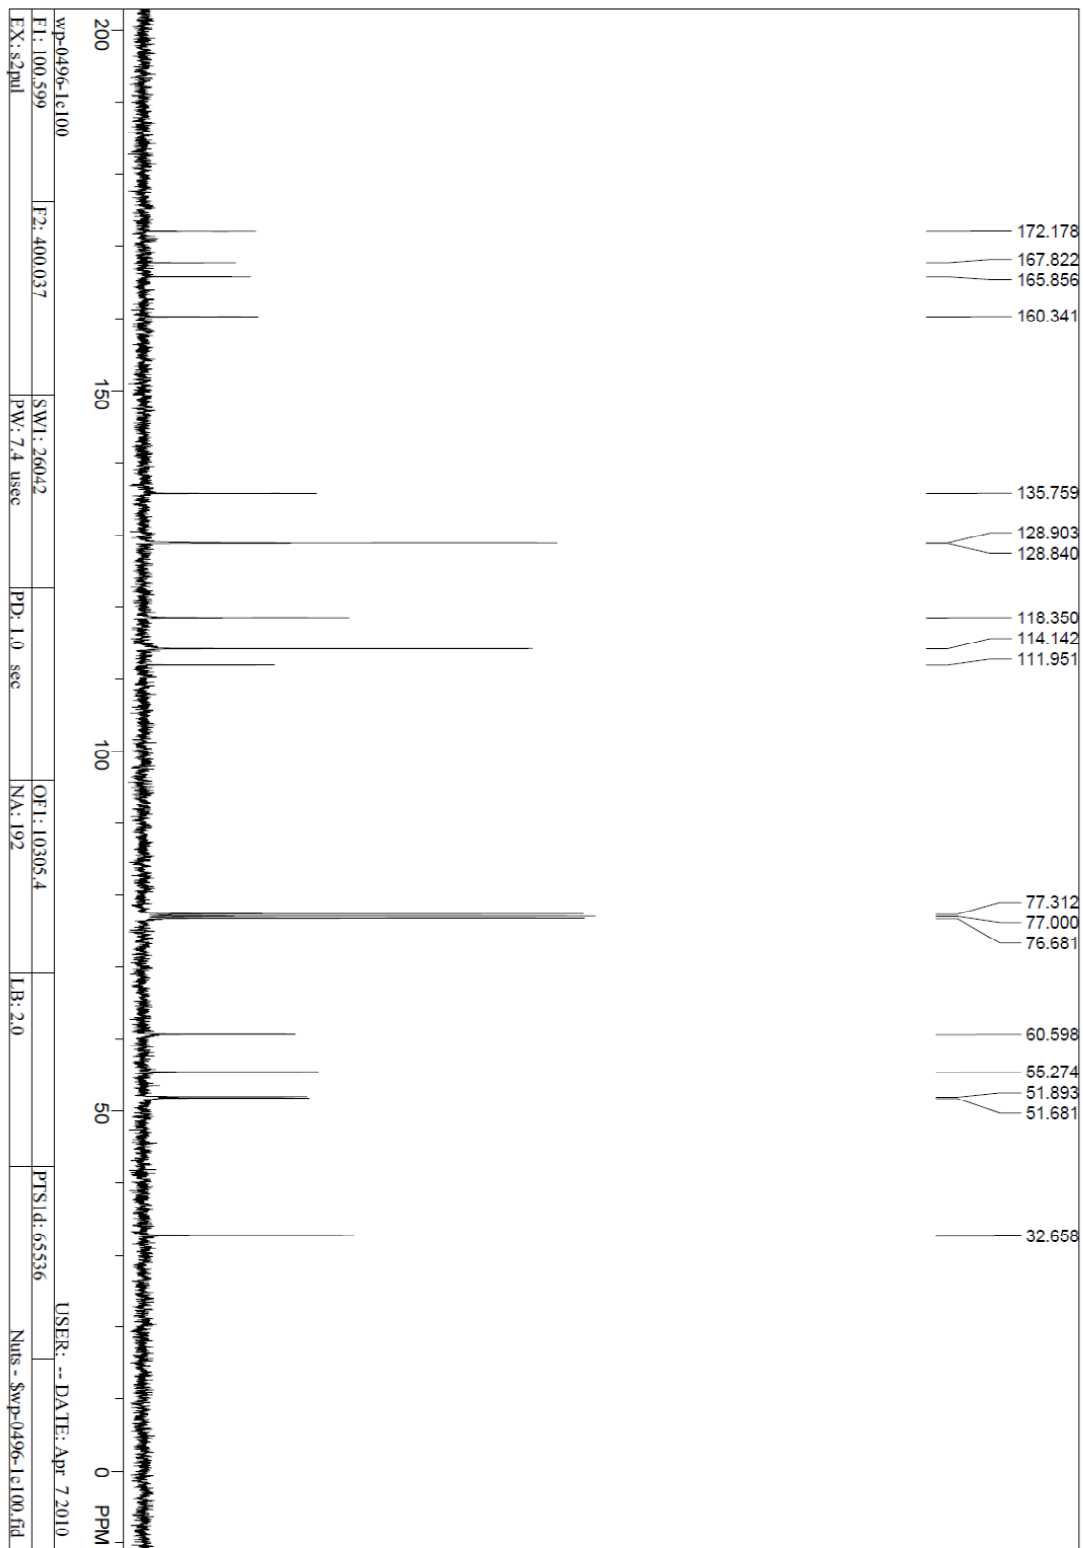

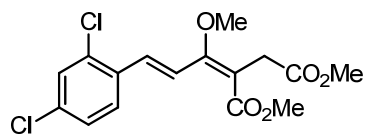

$^1\text{H}$  NMR (300 M Hz in  $\text{CDCl}_3$ )

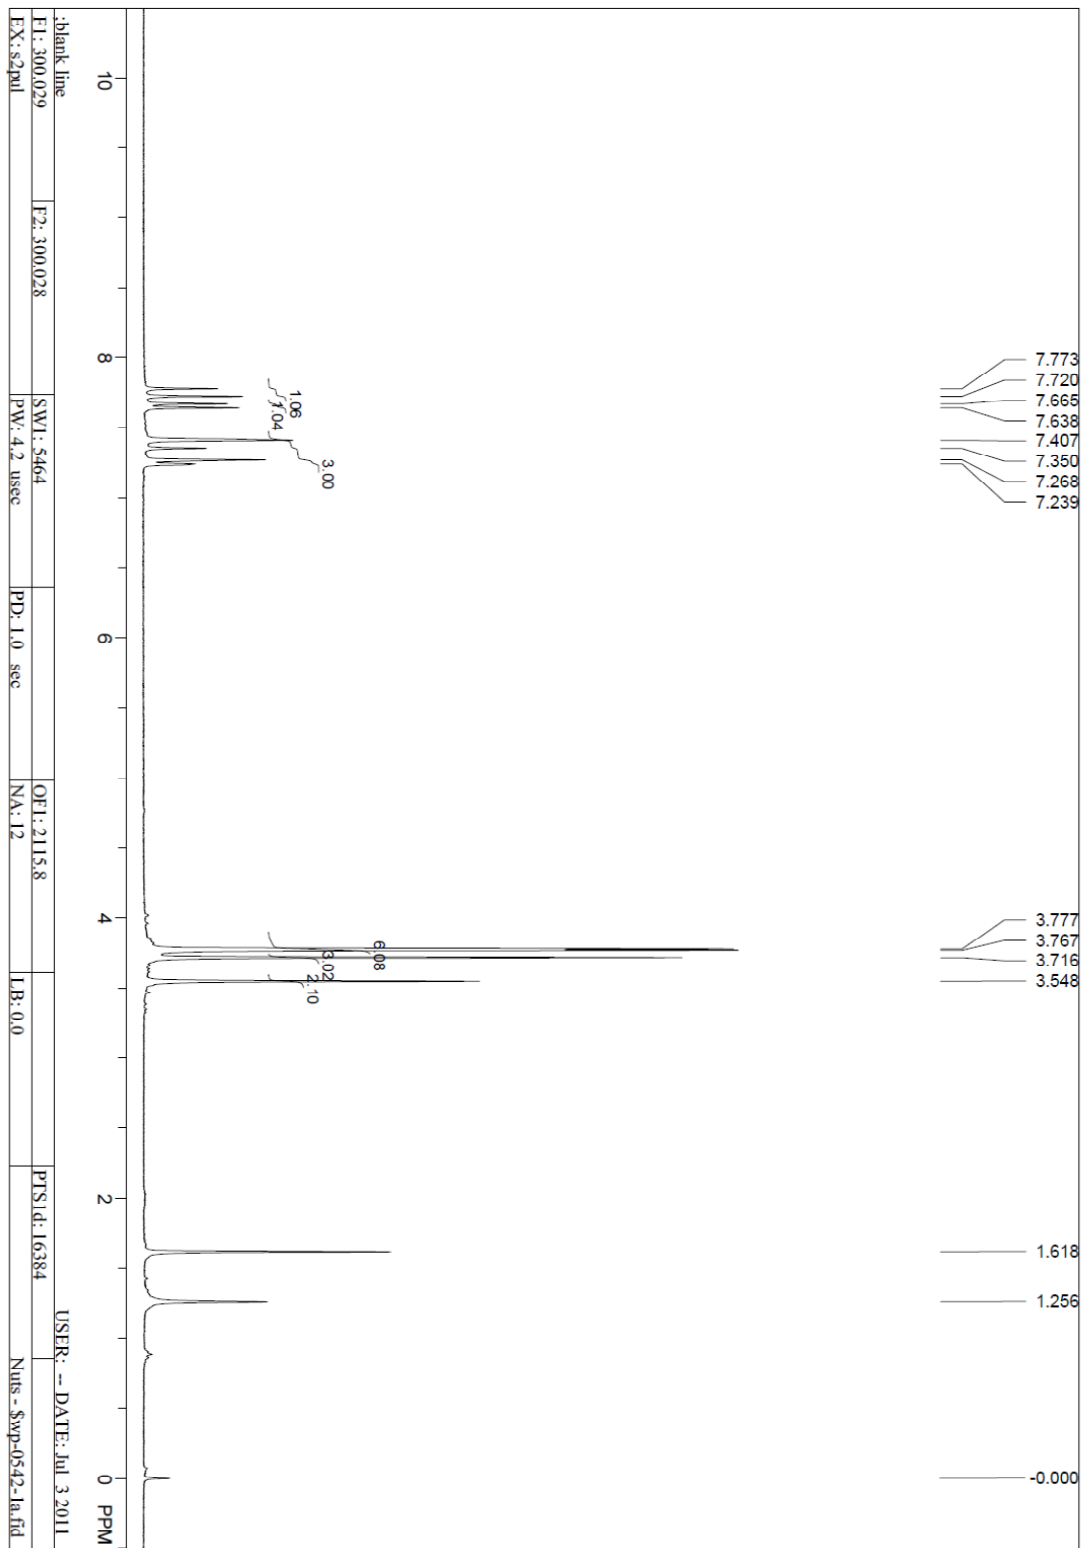

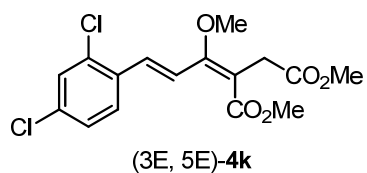

<sup>13</sup>C NMR (100 M Hz in CDCl<sub>3</sub>)

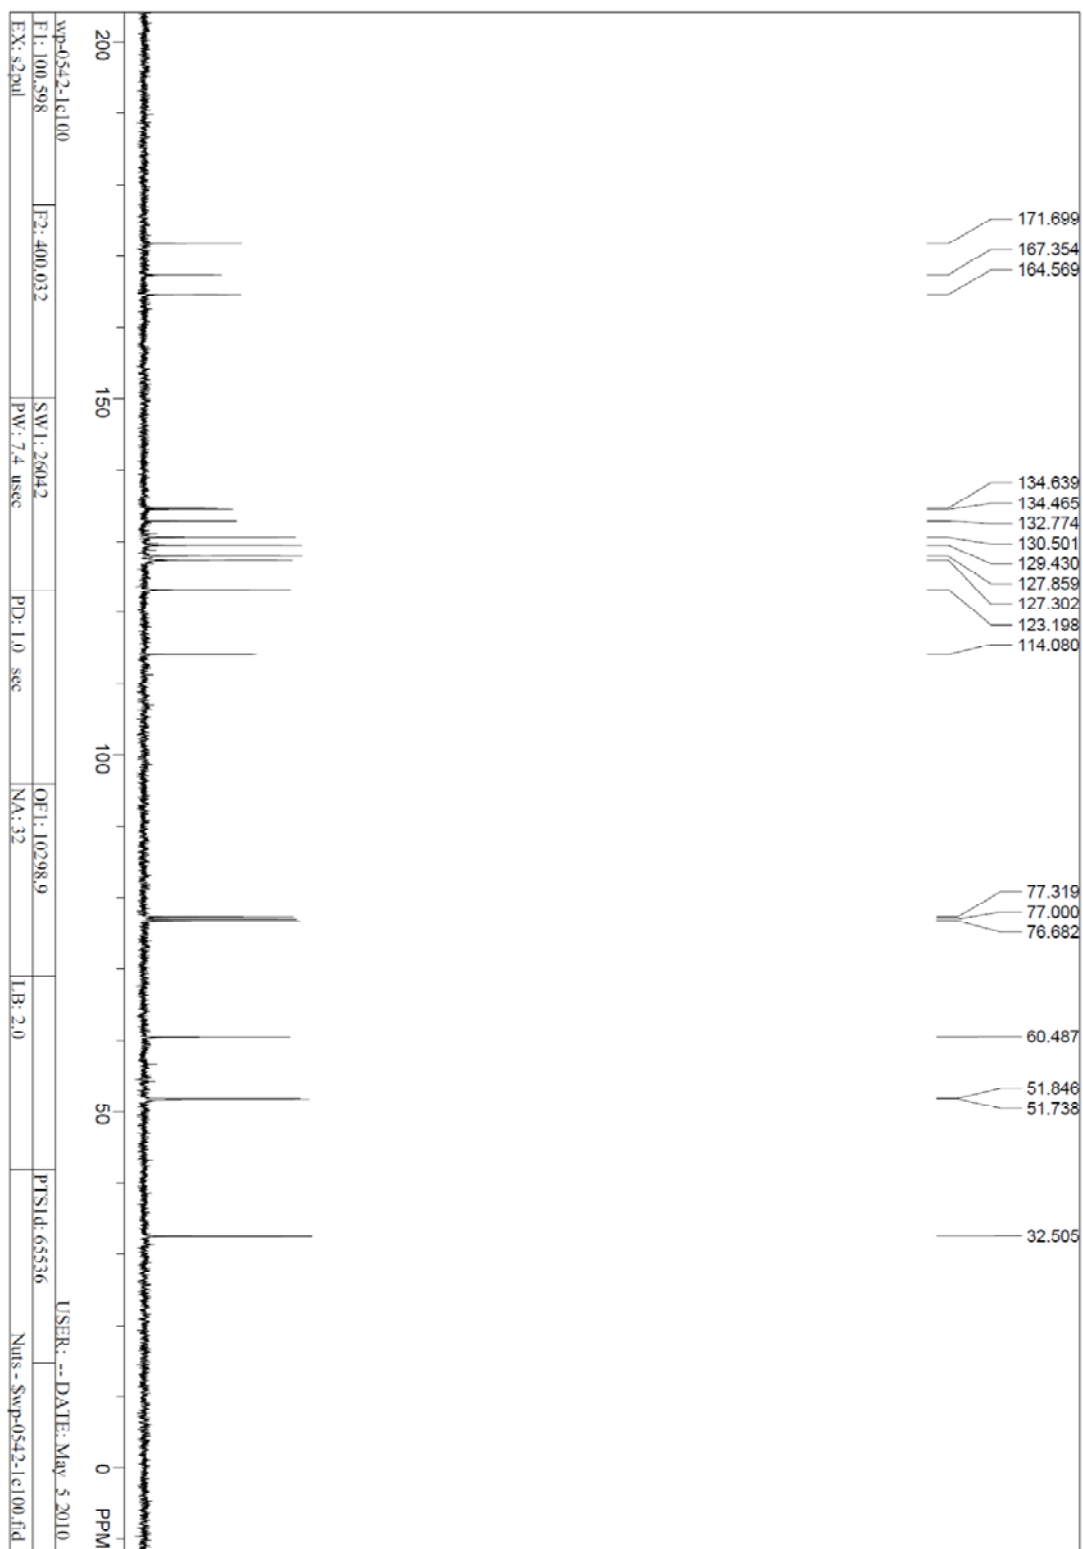

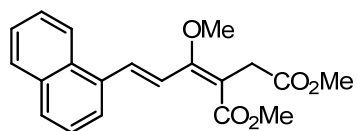

(3E, 5E)-4I

$^1\text{H NMR}$  (300 M Hz in  $\text{CDCl}_3$ )

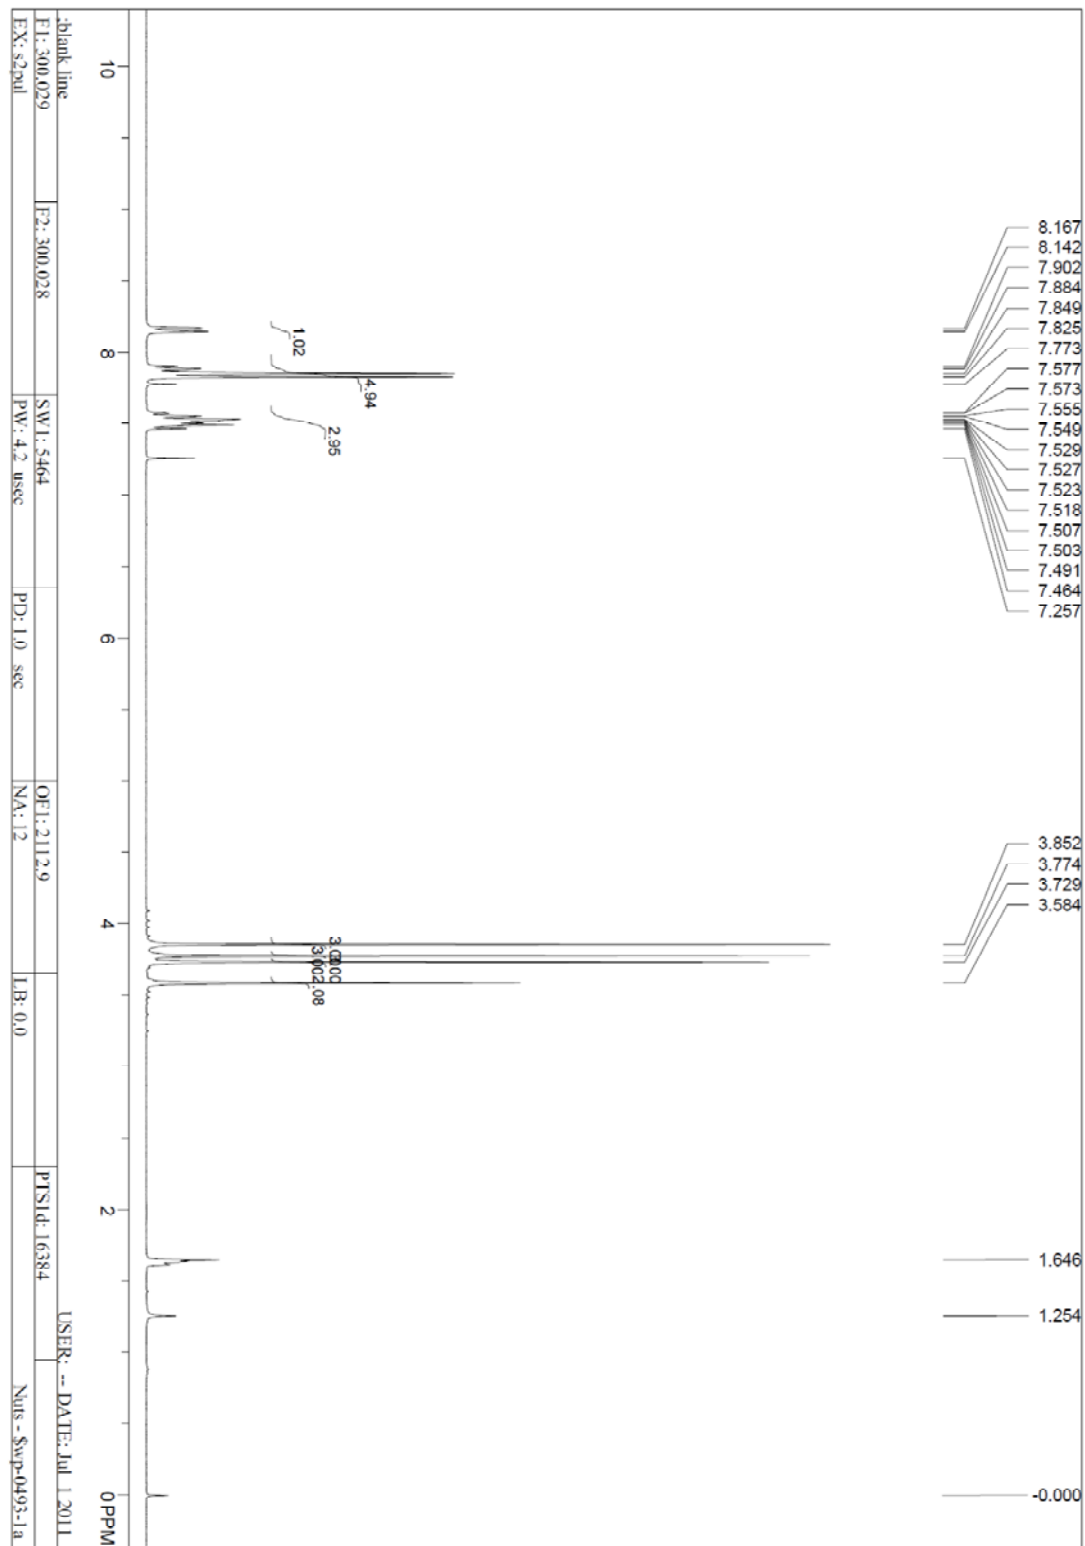



(3E, 5E)-4I

$^{13}\text{C}$  NMR (100 MHz in  $\text{CDCl}_3$ )

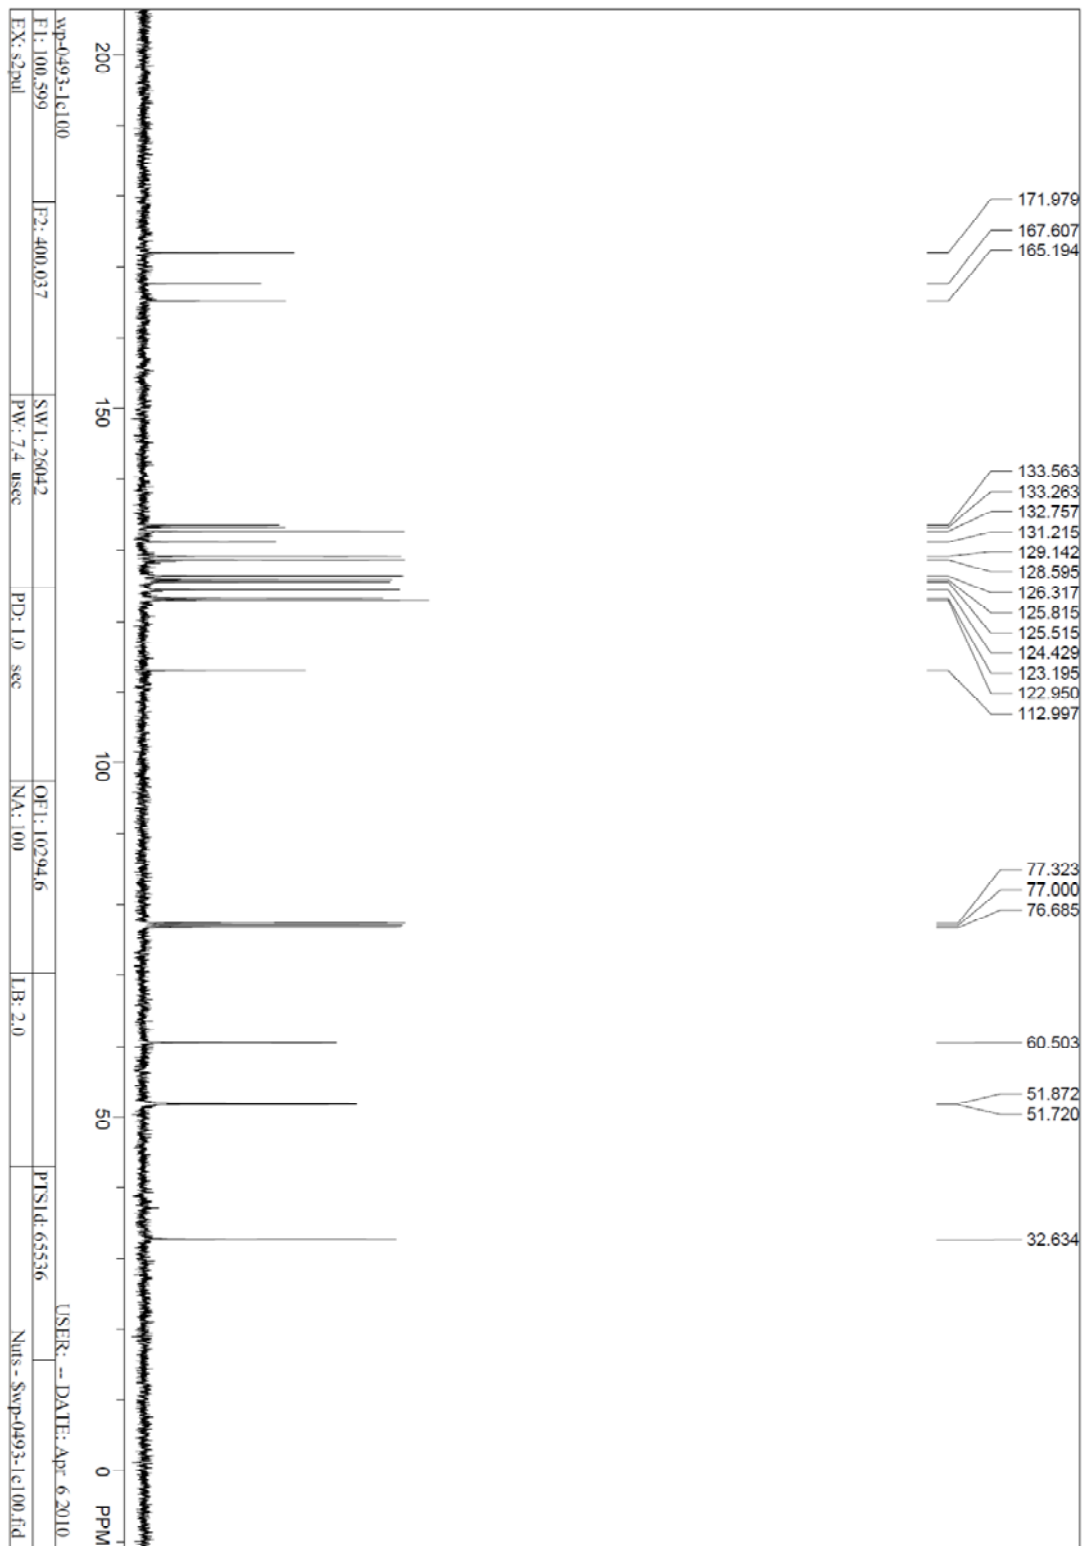

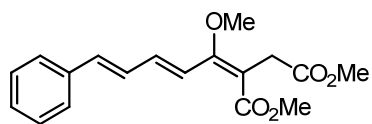

(3E, 5E)-4m

<sup>1</sup>H NMR (400 M Hz in CDCl<sub>3</sub>)

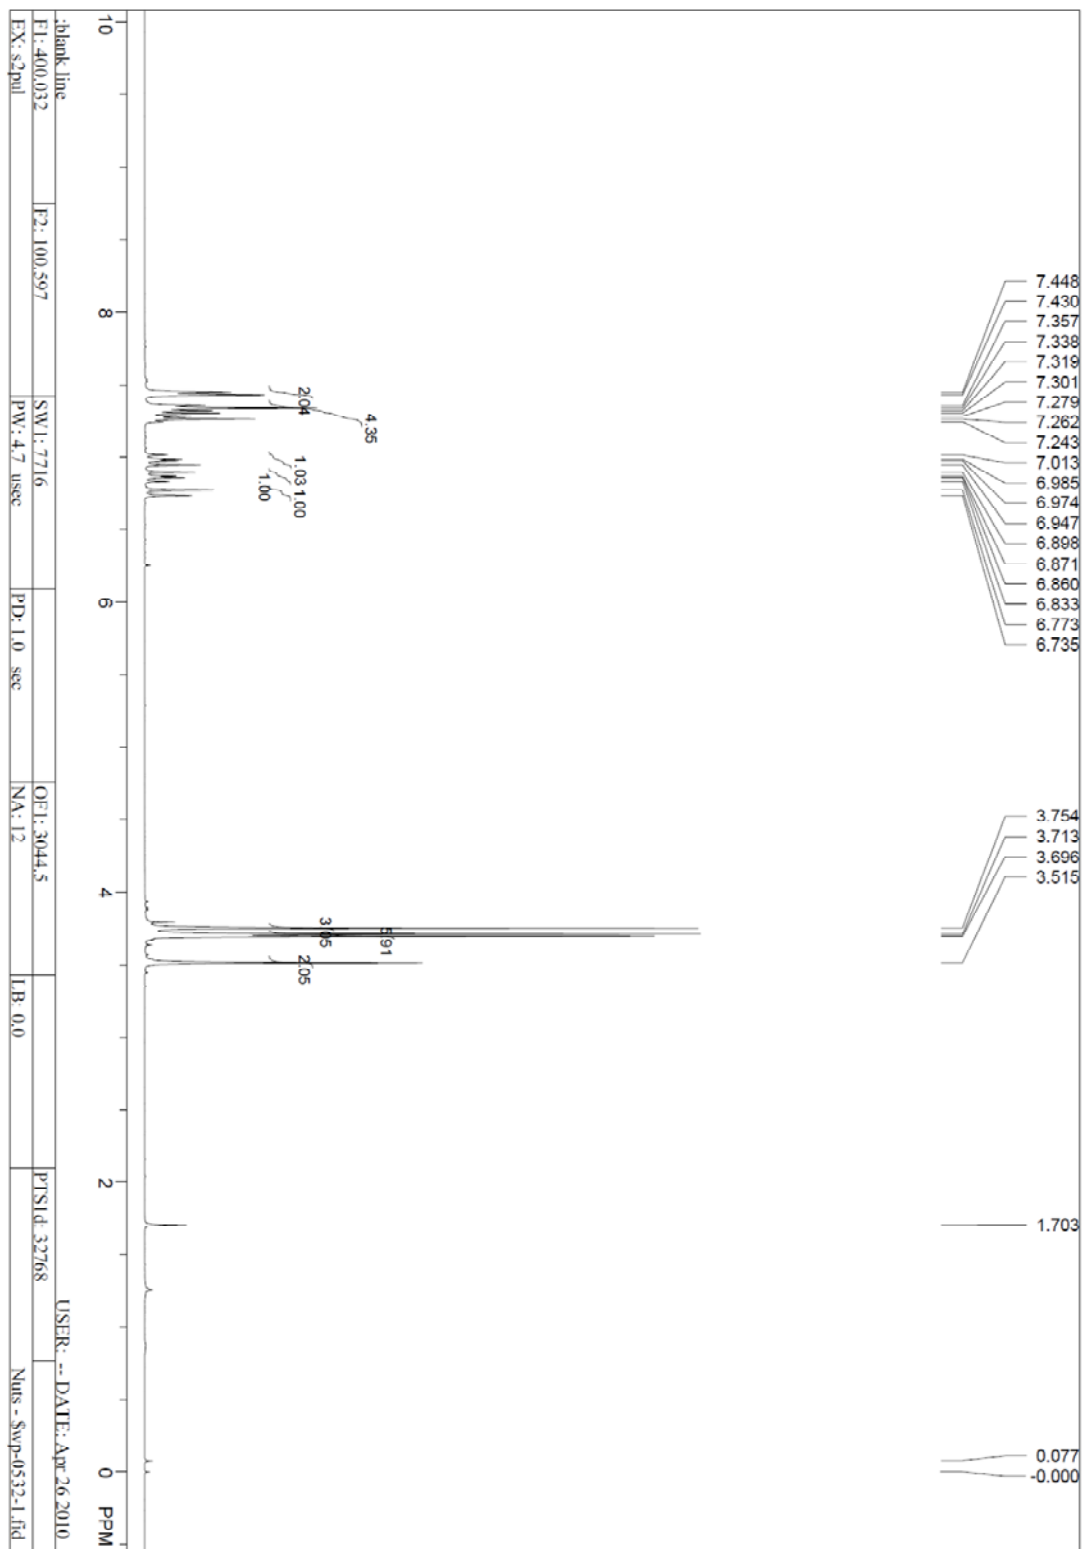

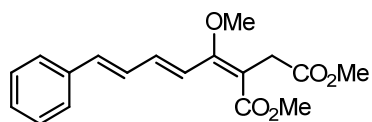

(3E, 5E)-4m

<sup>13</sup>C NMR (100 M Hz in CDCl<sub>3</sub>)

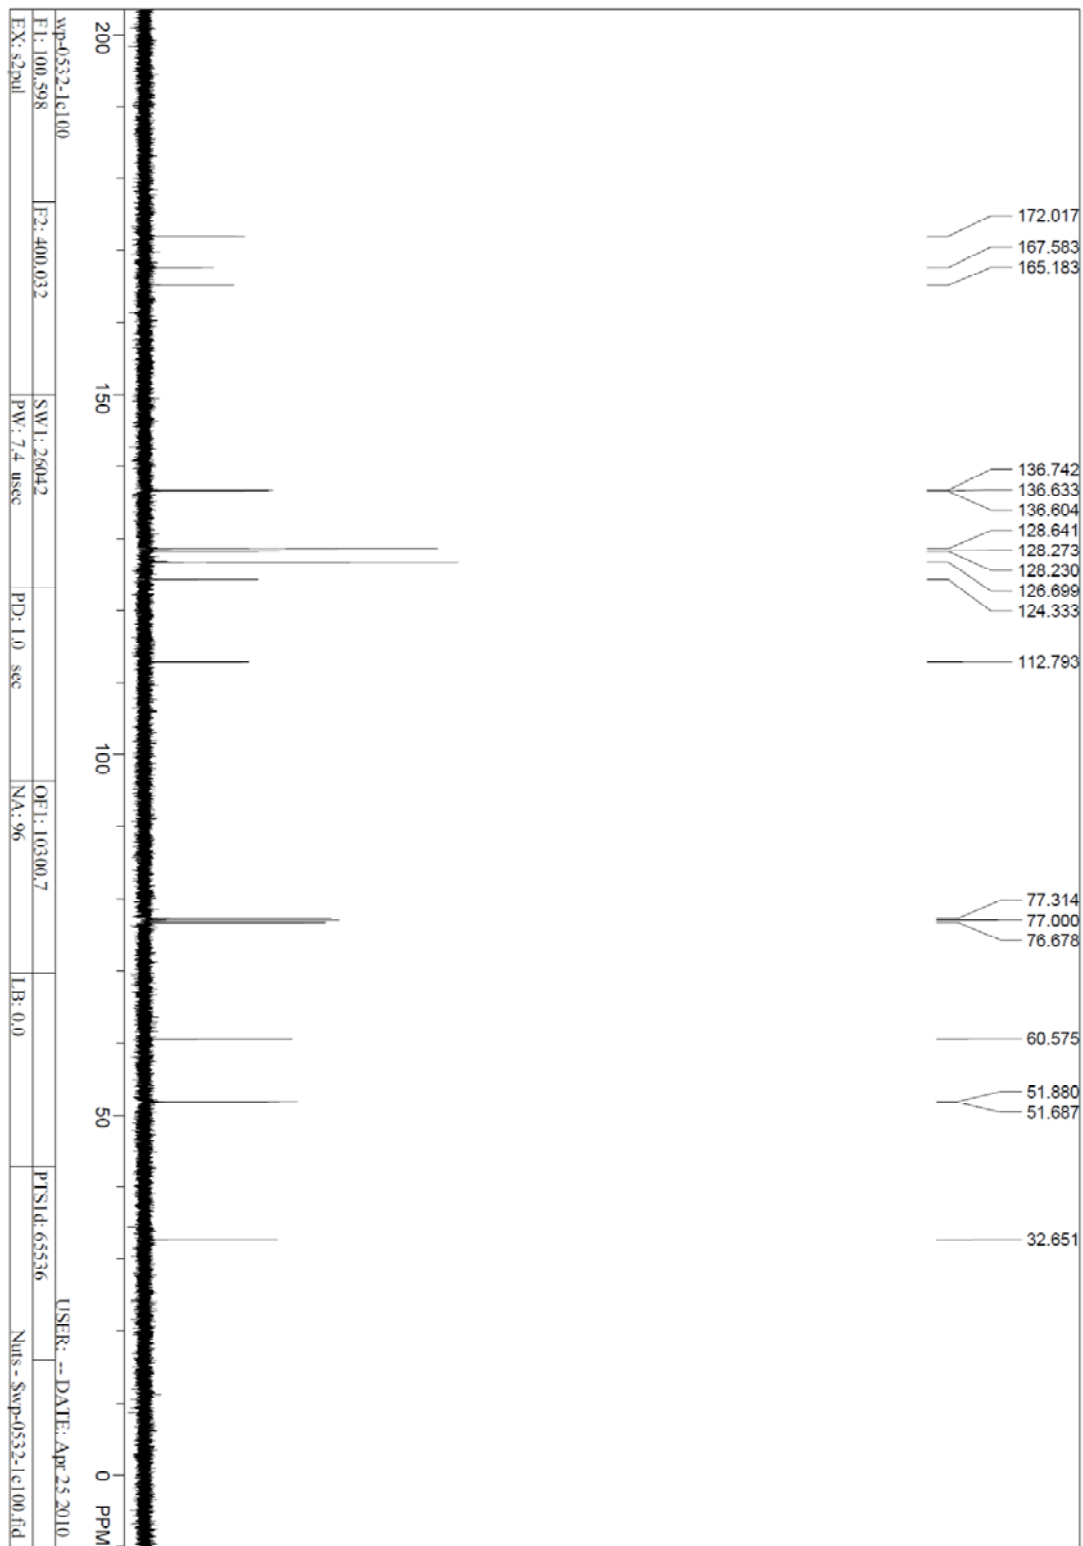

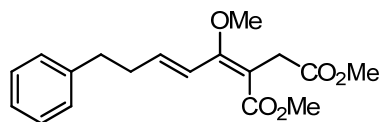

(3E, 5E)-4n

$^1\text{H}$  NMR (300 MHz in  $\text{CDCl}_3$ )

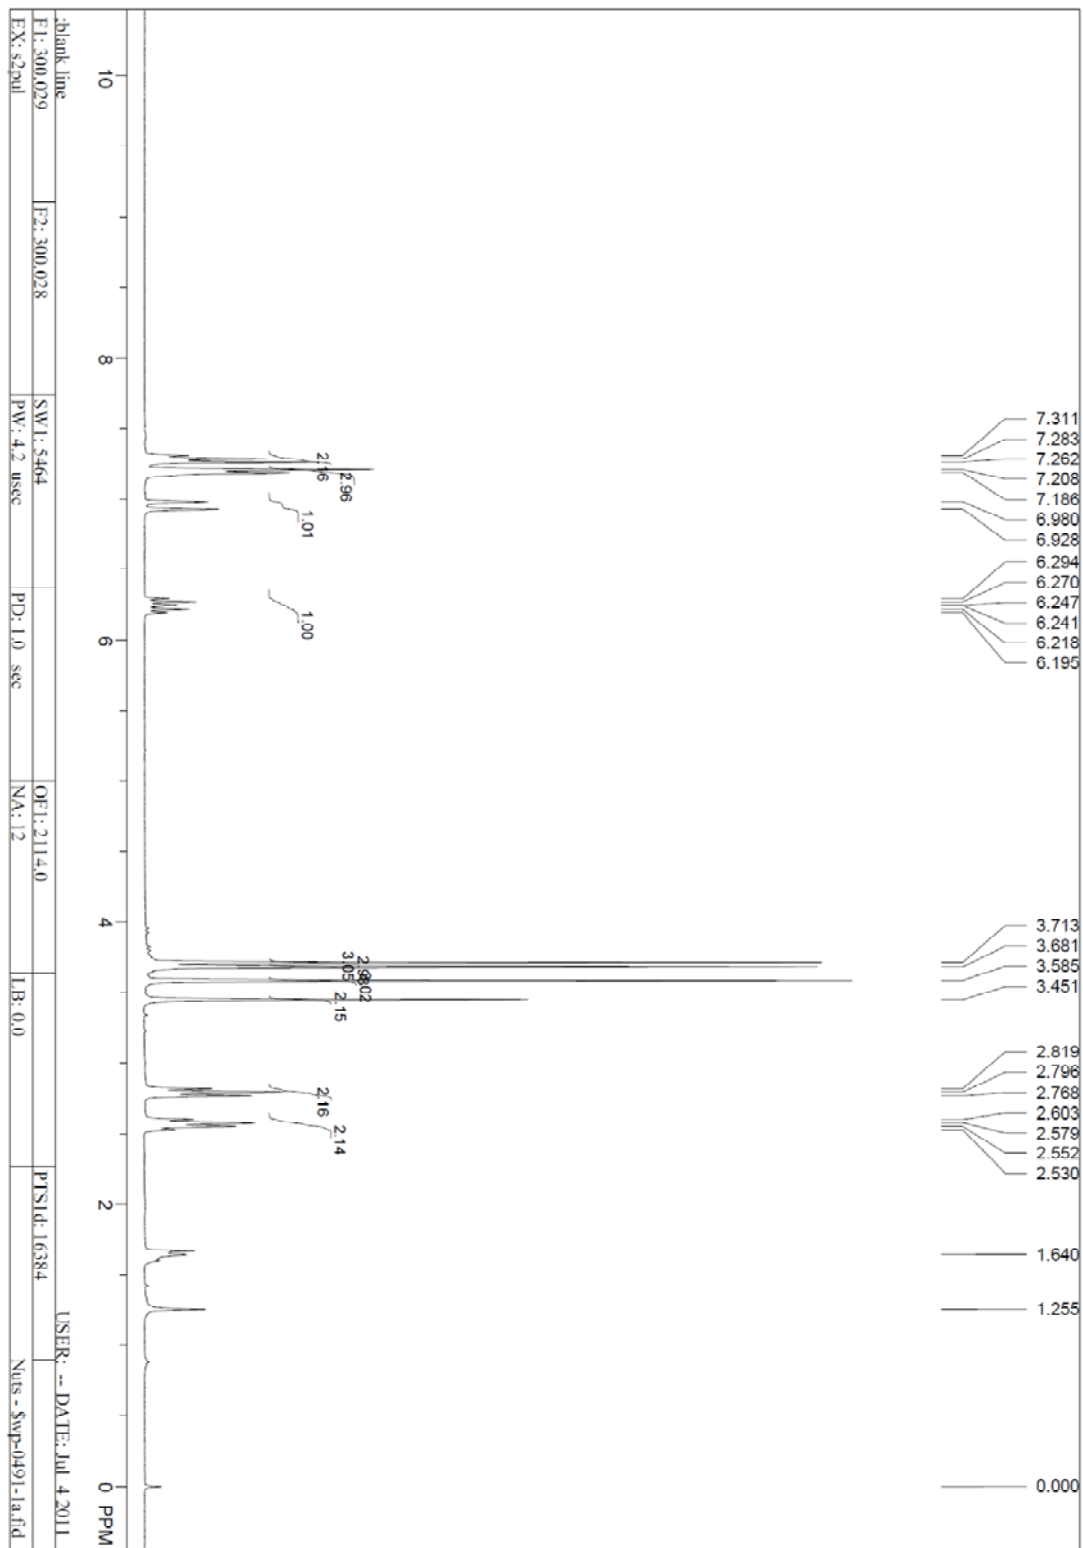





(3E, 5E)-4n

$^{13}\text{C}$  NMR (100 MHz in  $\text{CDCl}_3$ )

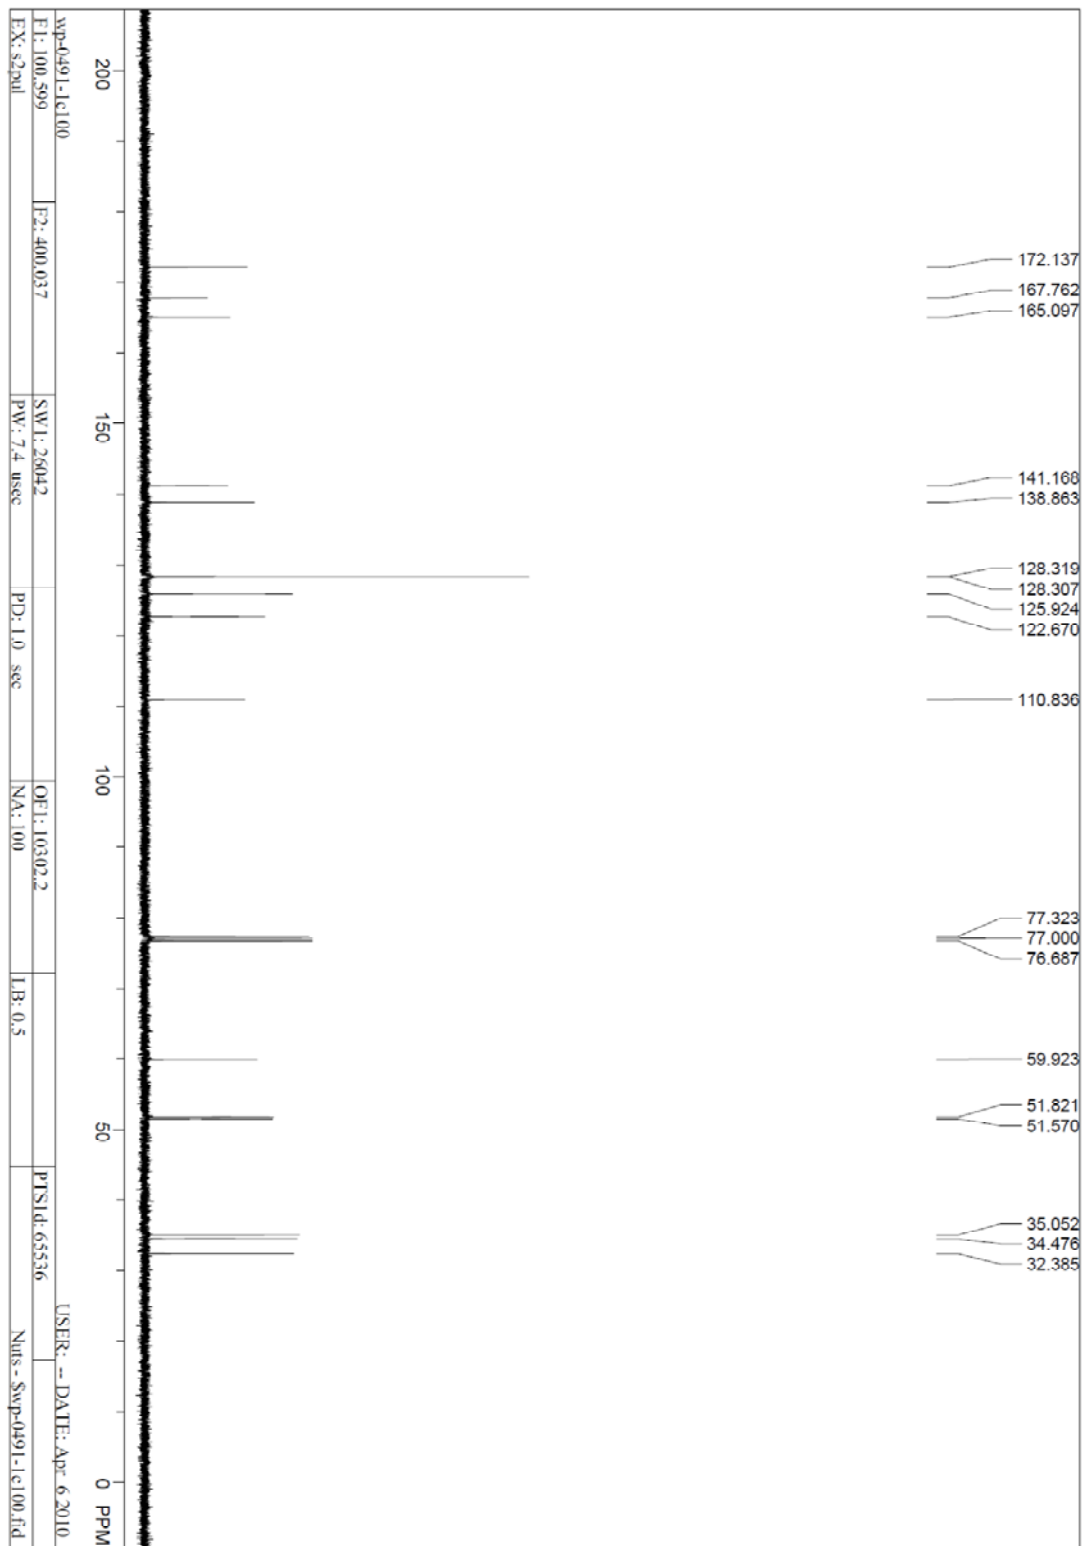

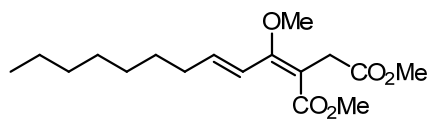

(3E, 5E)-4o

$^1\text{H}$  NMR (400 MHz in  $\text{CDCl}_3$ )

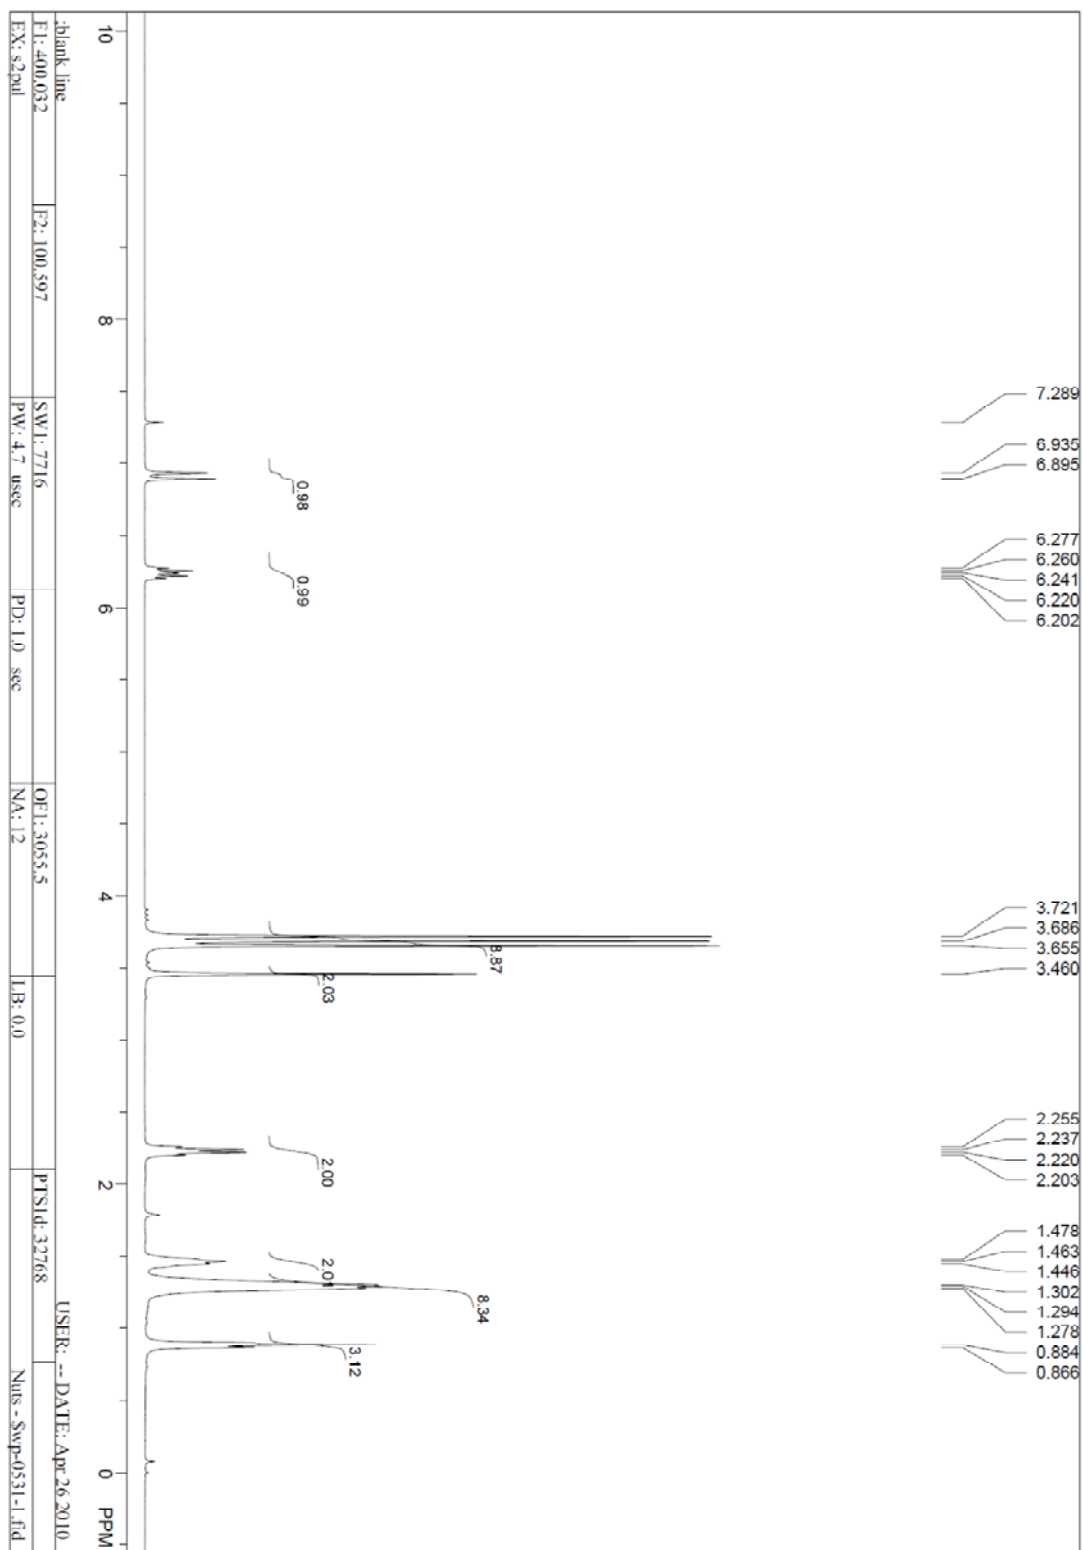

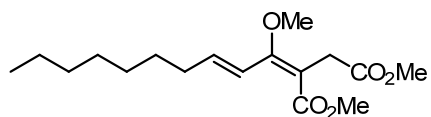

(3E, 5E)-4o

$^{13}\text{C}$  NMR (100 MHz in  $\text{CDCl}_3$ )

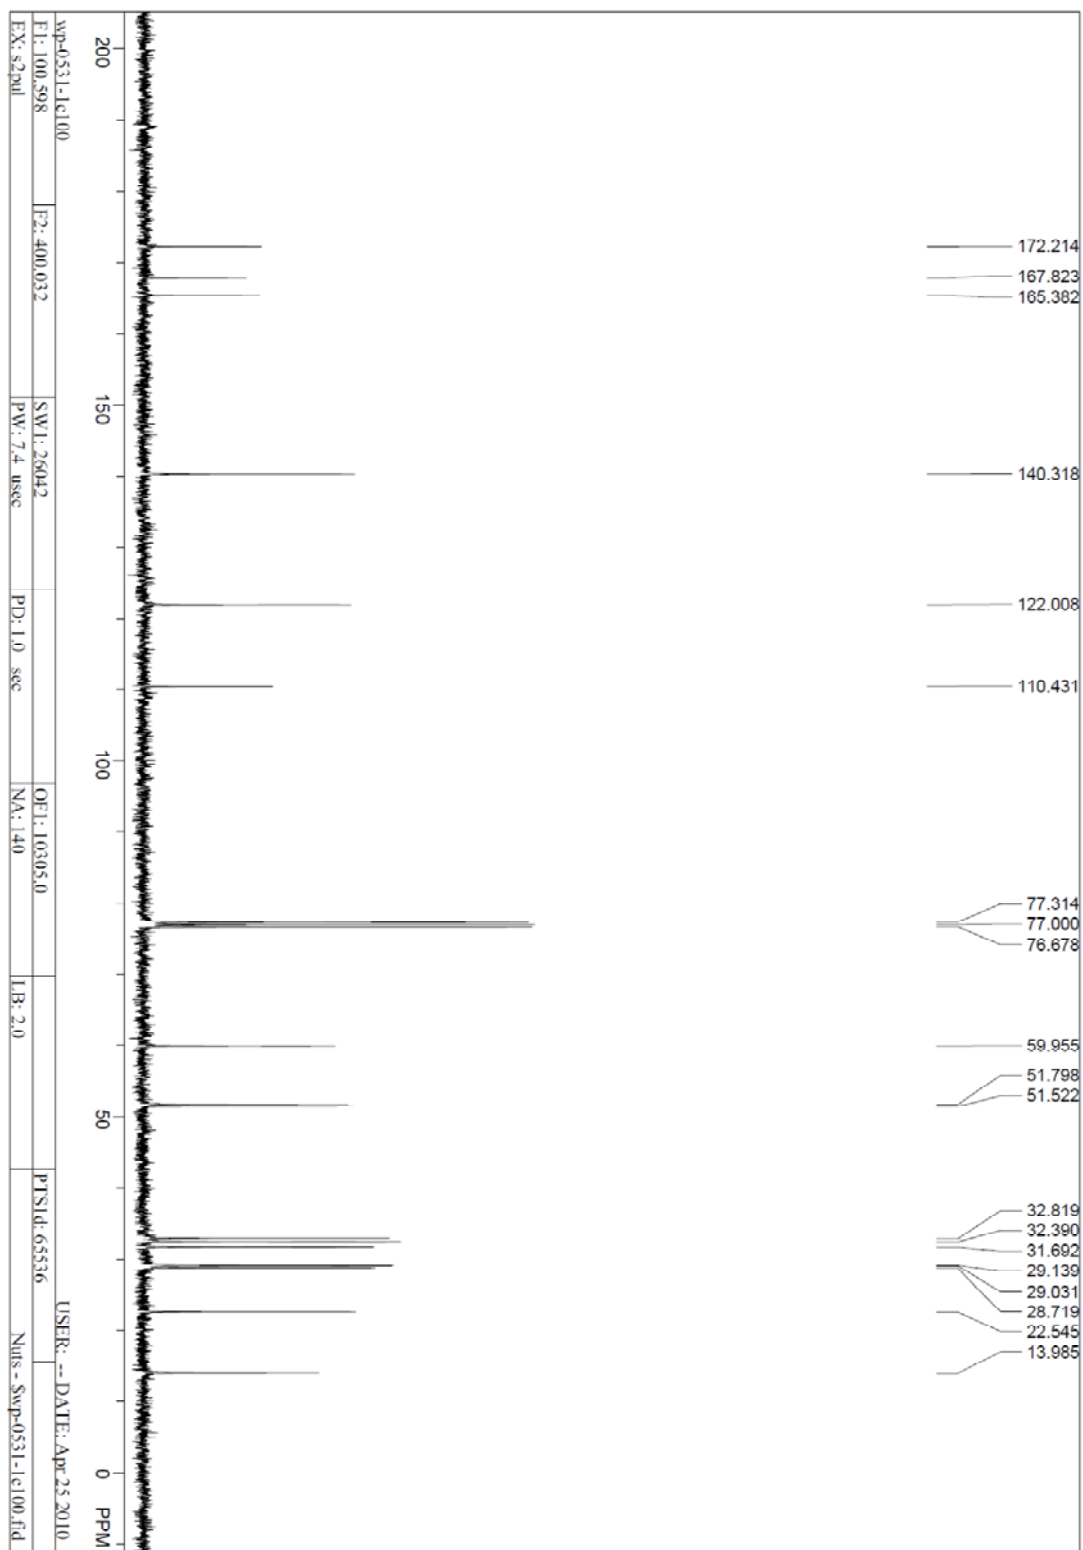

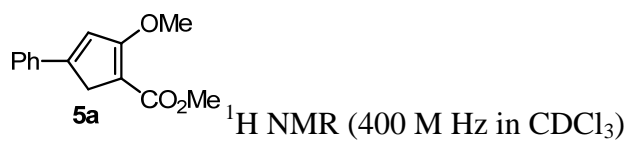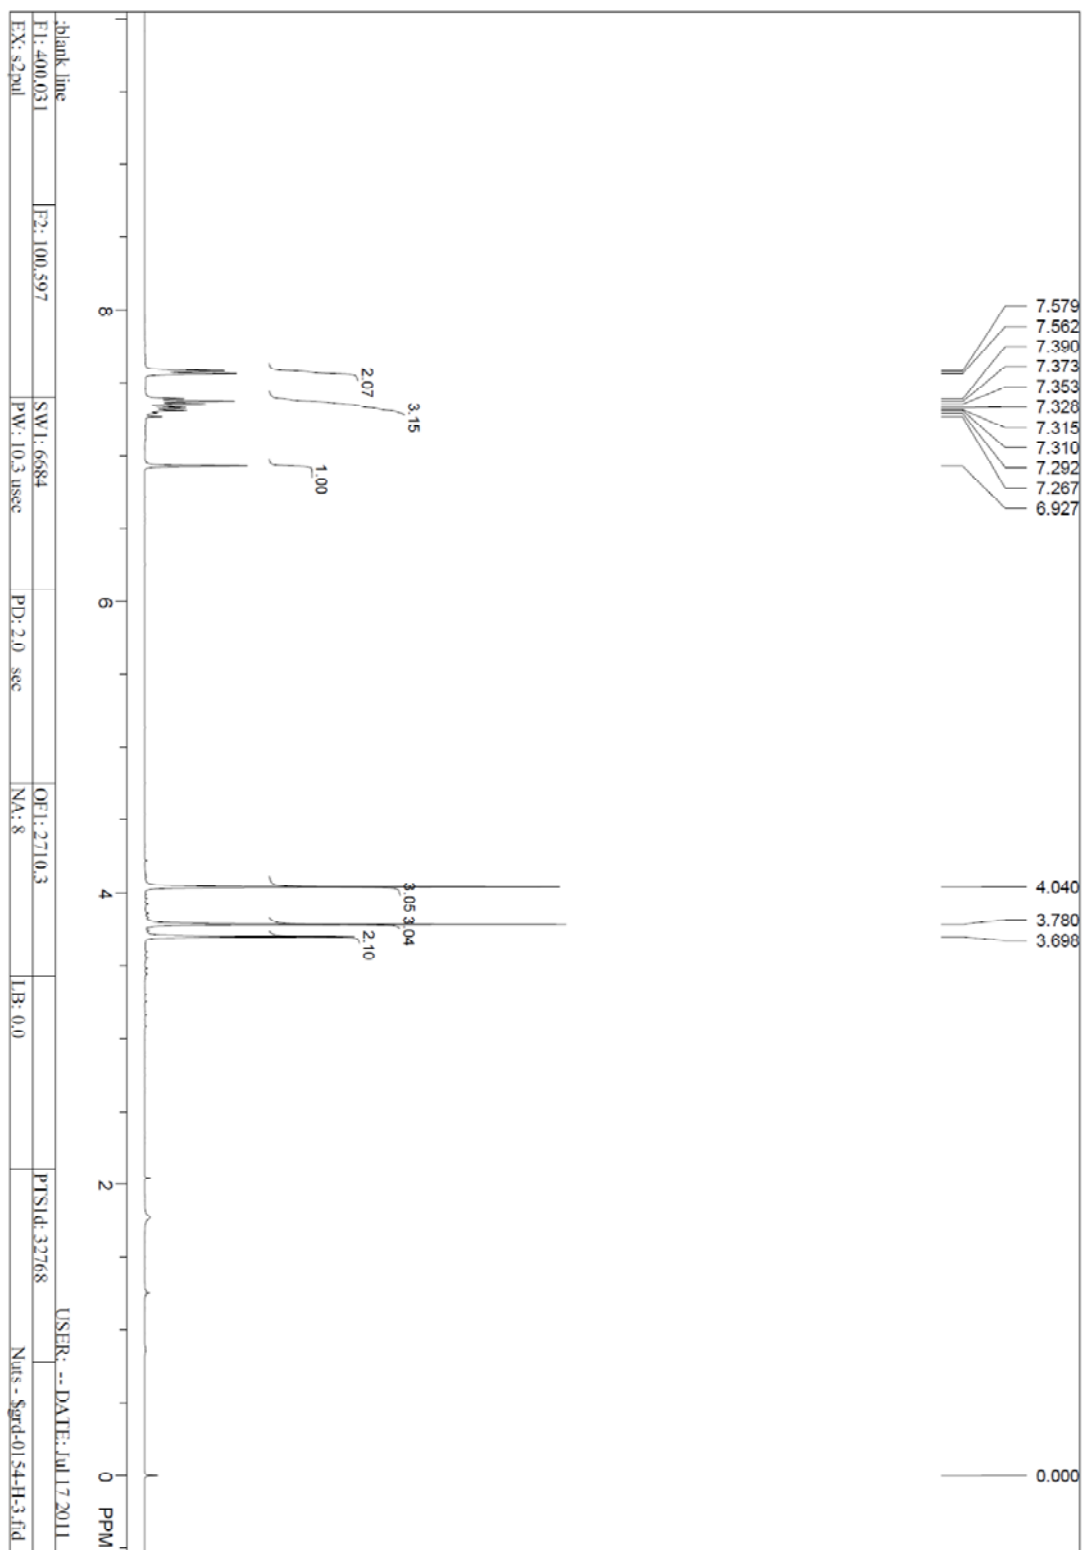

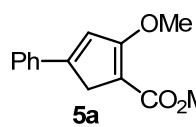

$^{13}\text{C}$  NMR (100 MHz in  $\text{CDCl}_3$ )

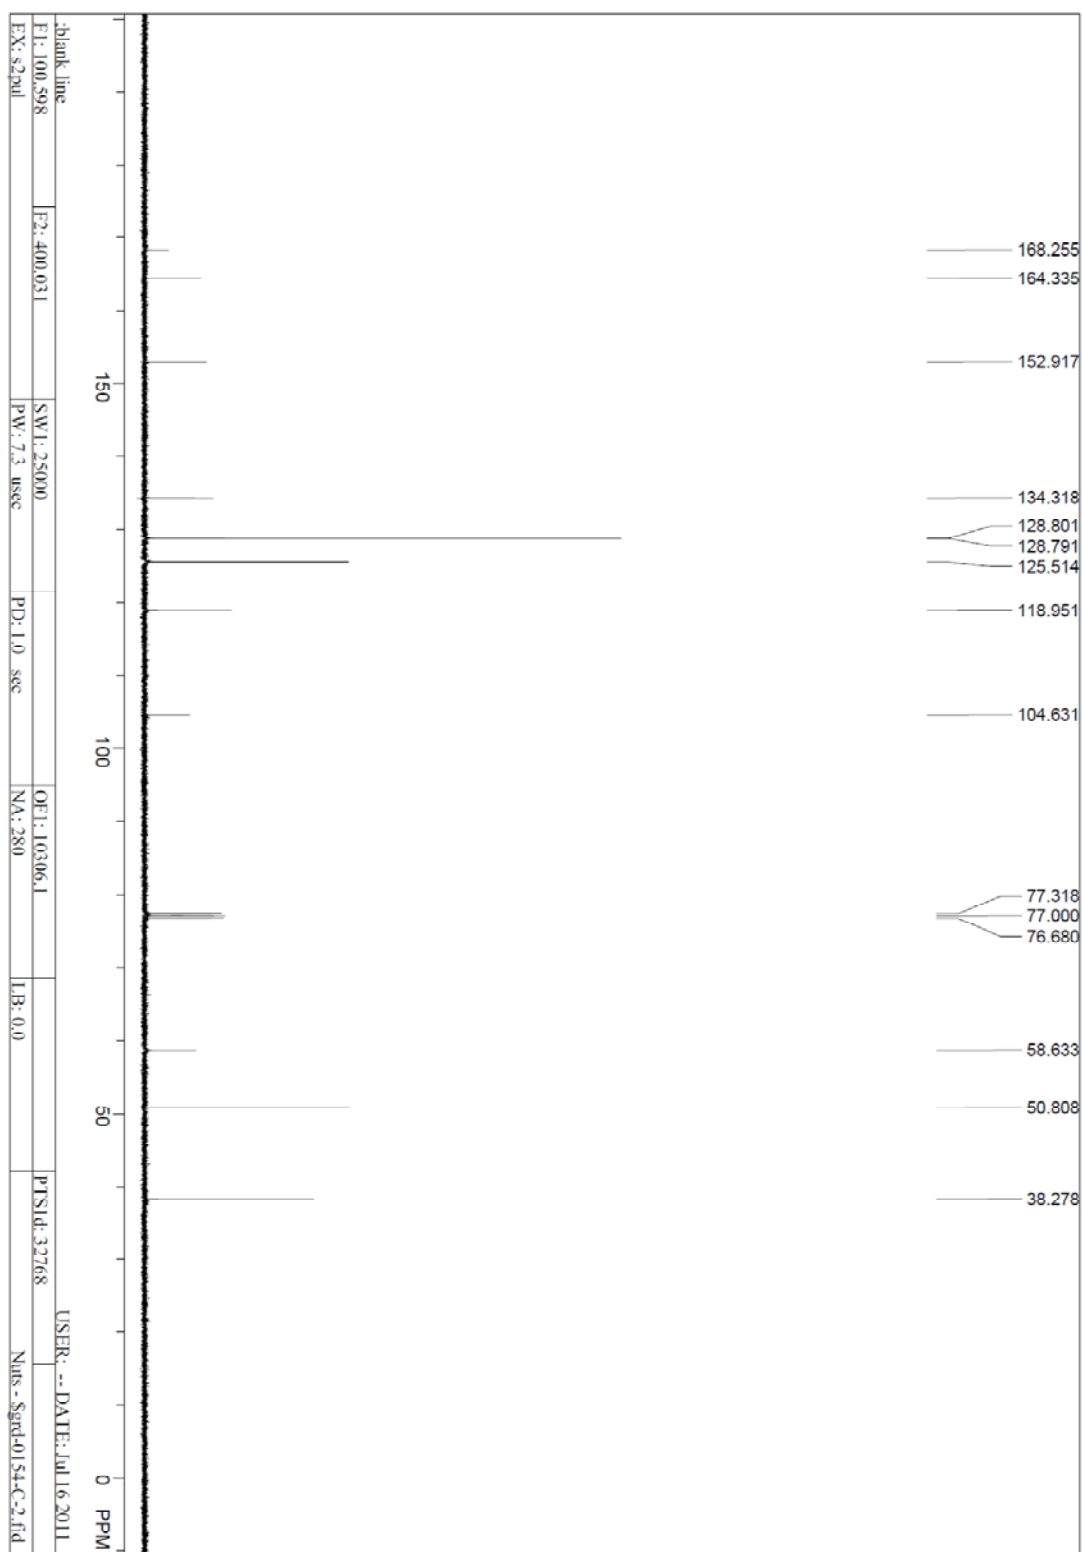

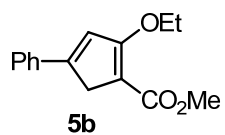

<sup>1</sup>H NMR (300 M Hz in CDCl<sub>3</sub>)

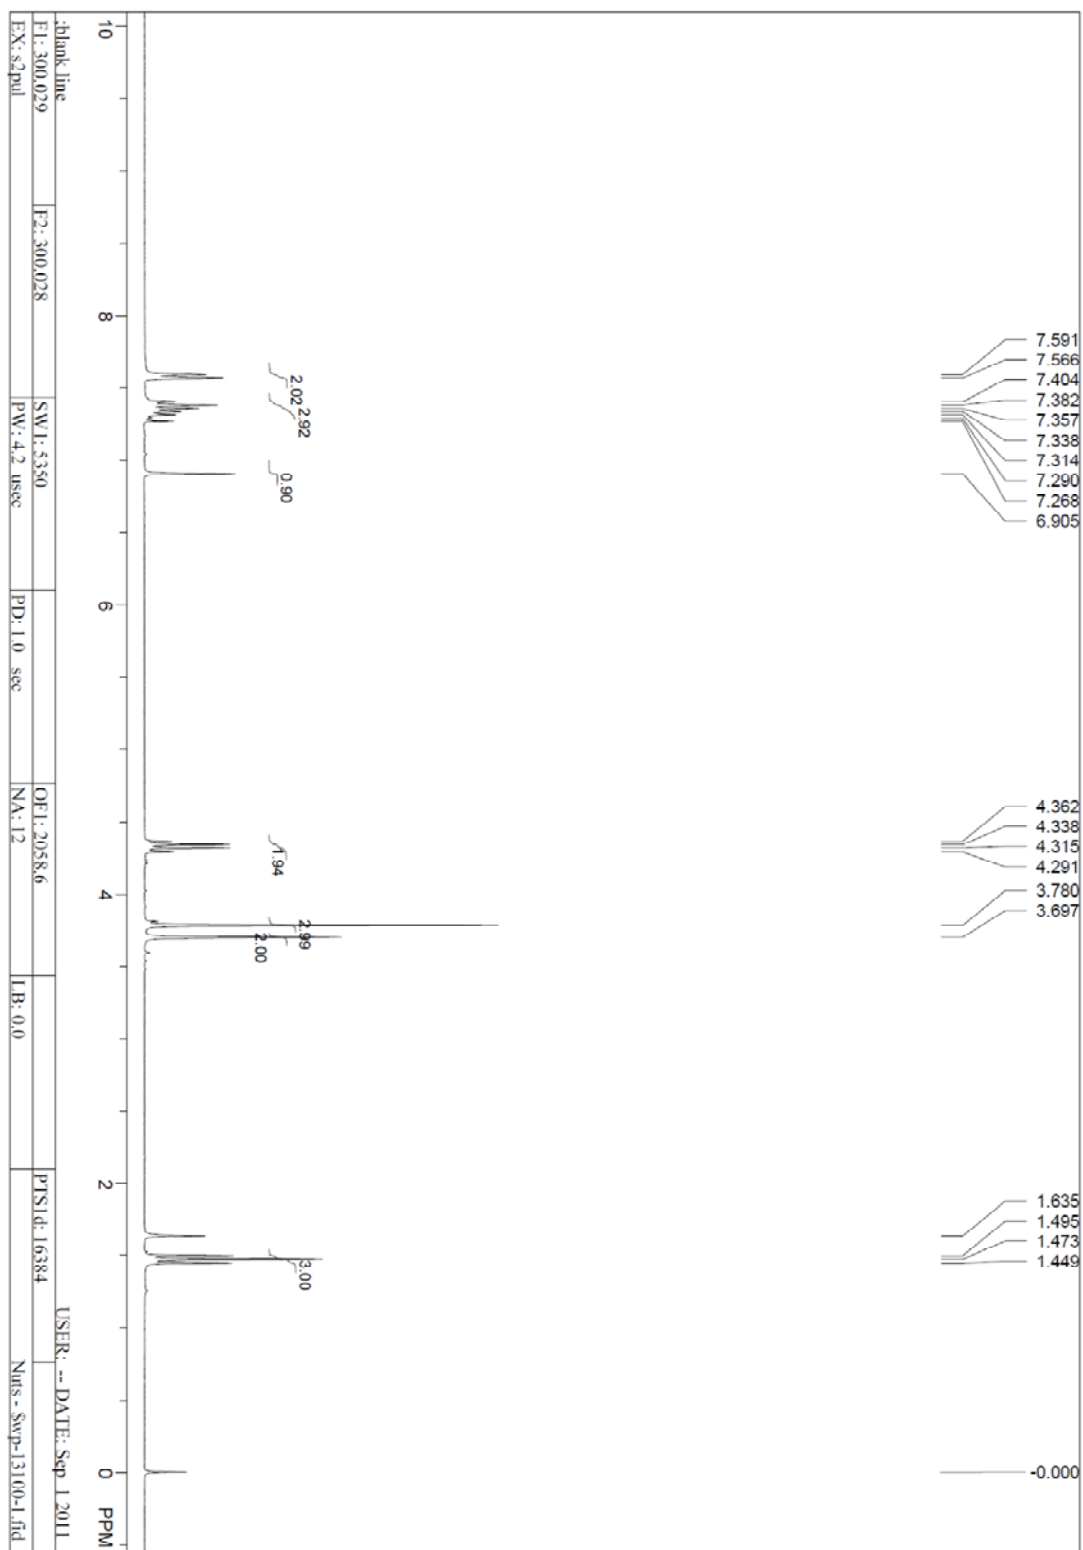

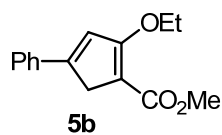

$^{13}\text{C}$  NMR (100 MHz in  $\text{CDCl}_3$ )

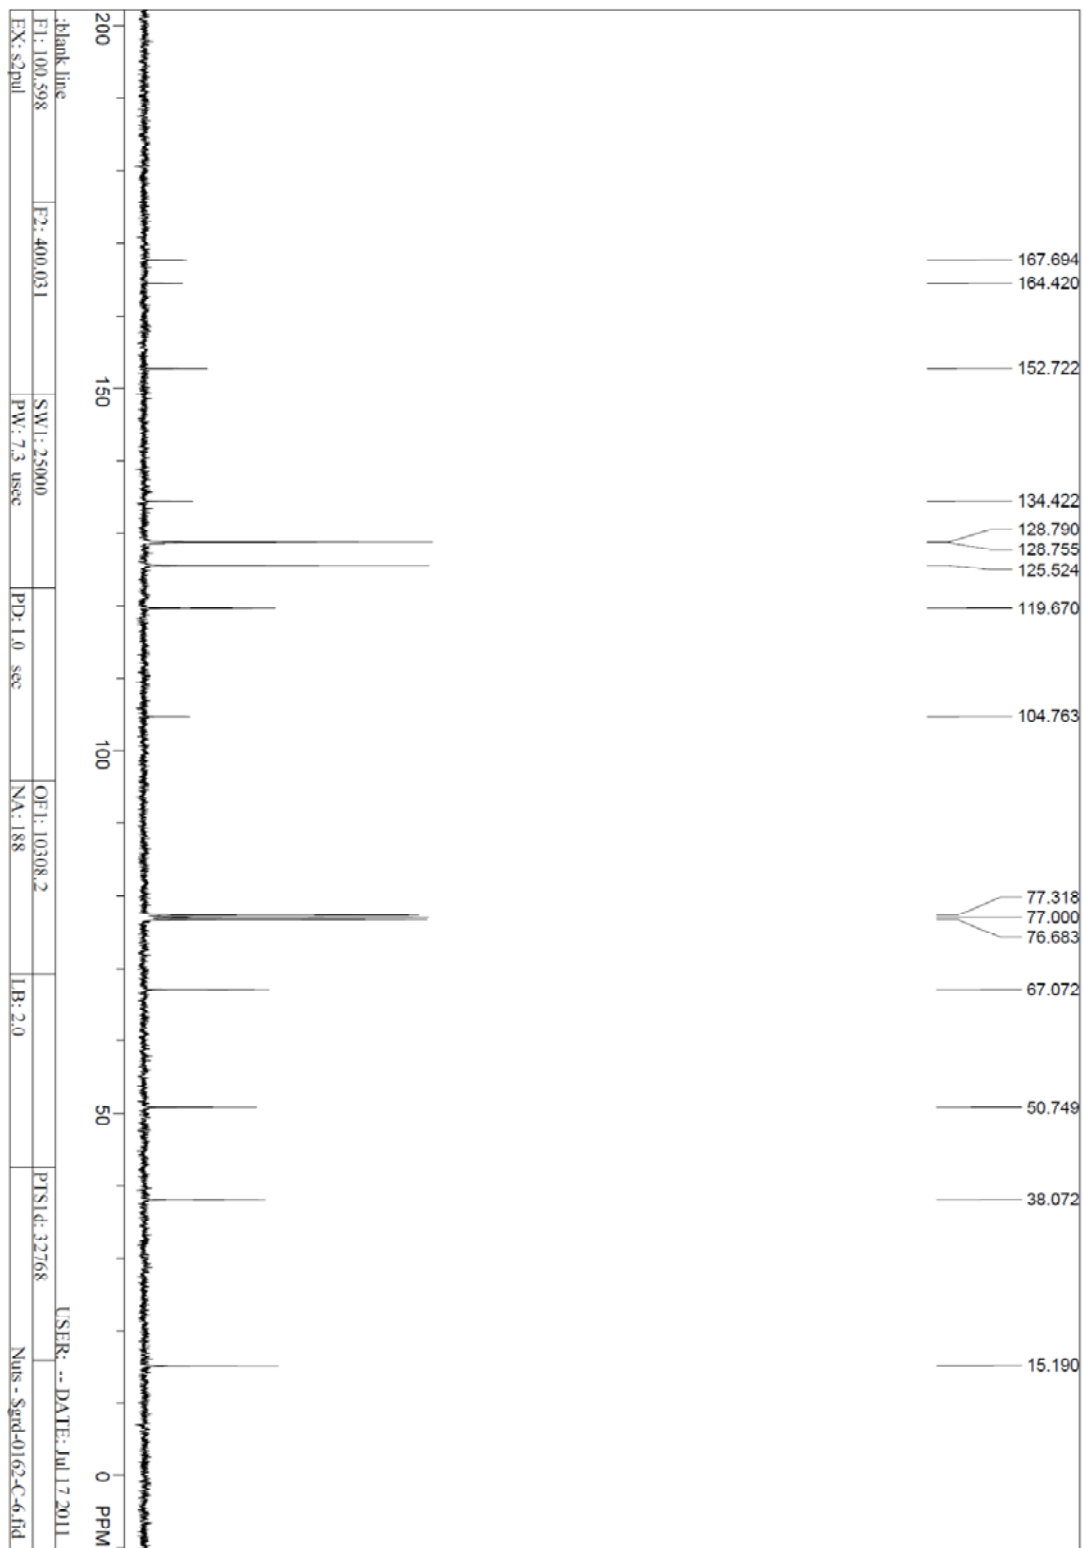

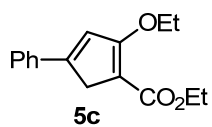

<sup>1</sup>H NMR (300 MHz in CDCl<sub>3</sub>)

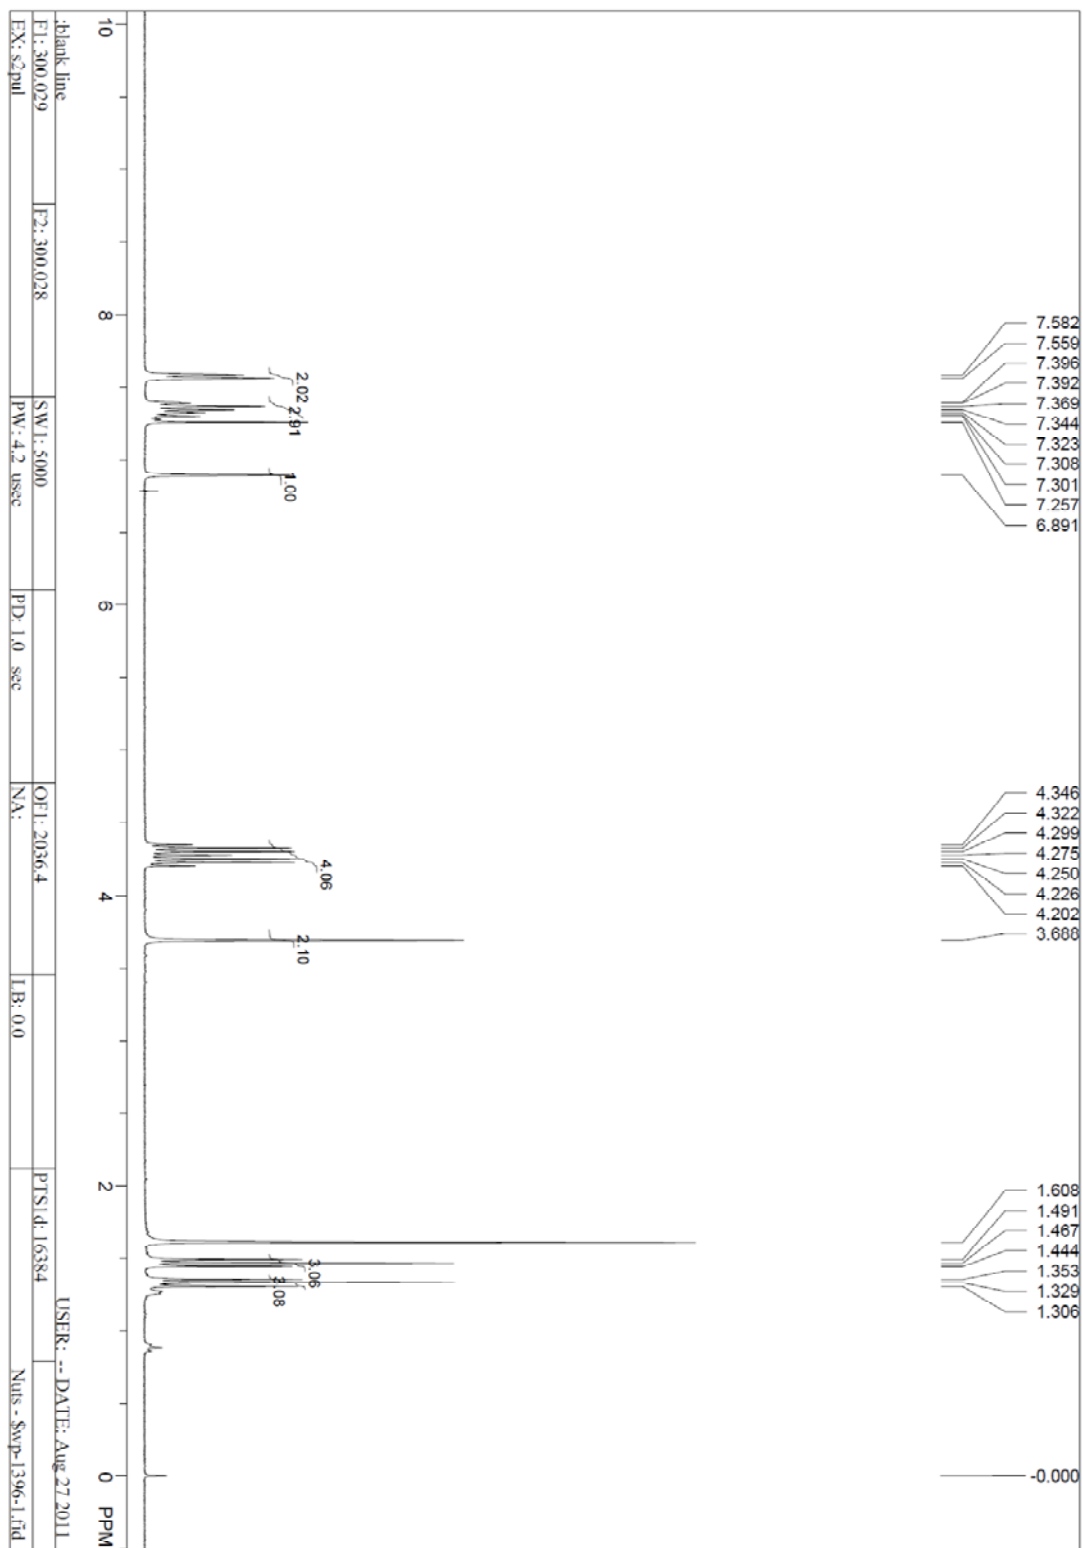



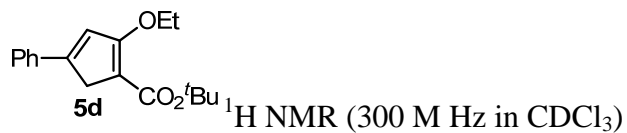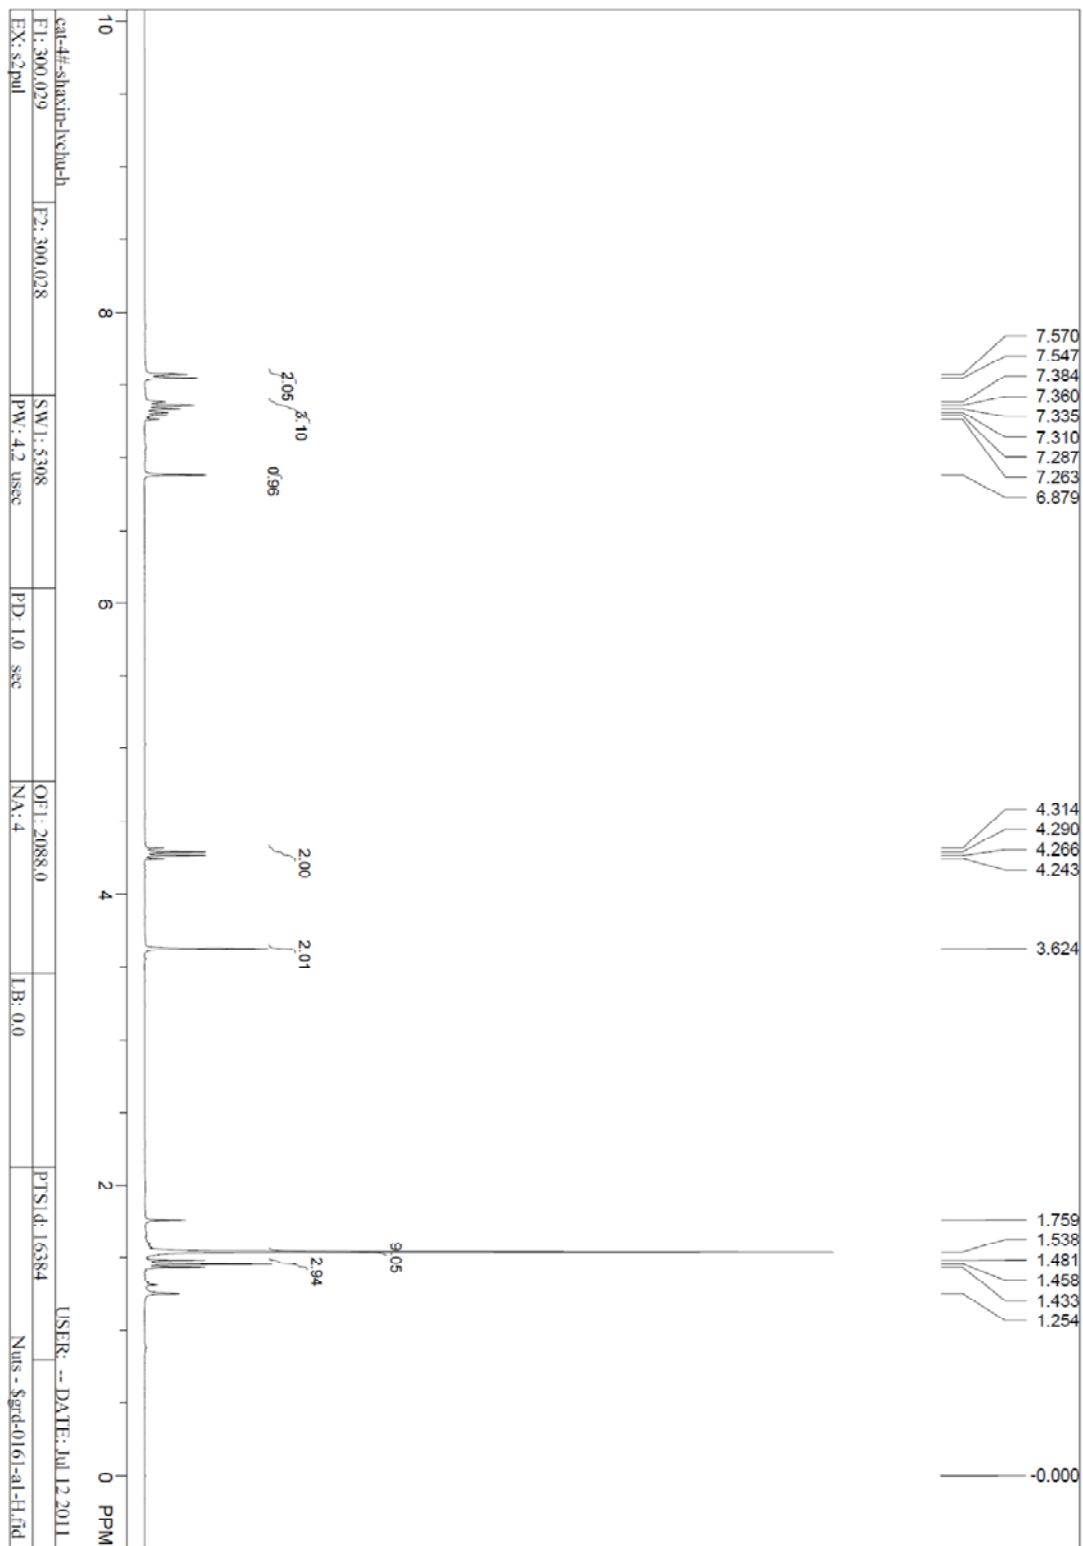

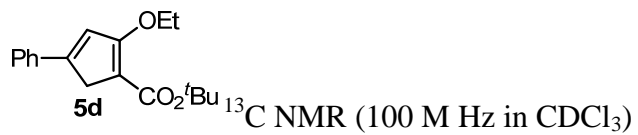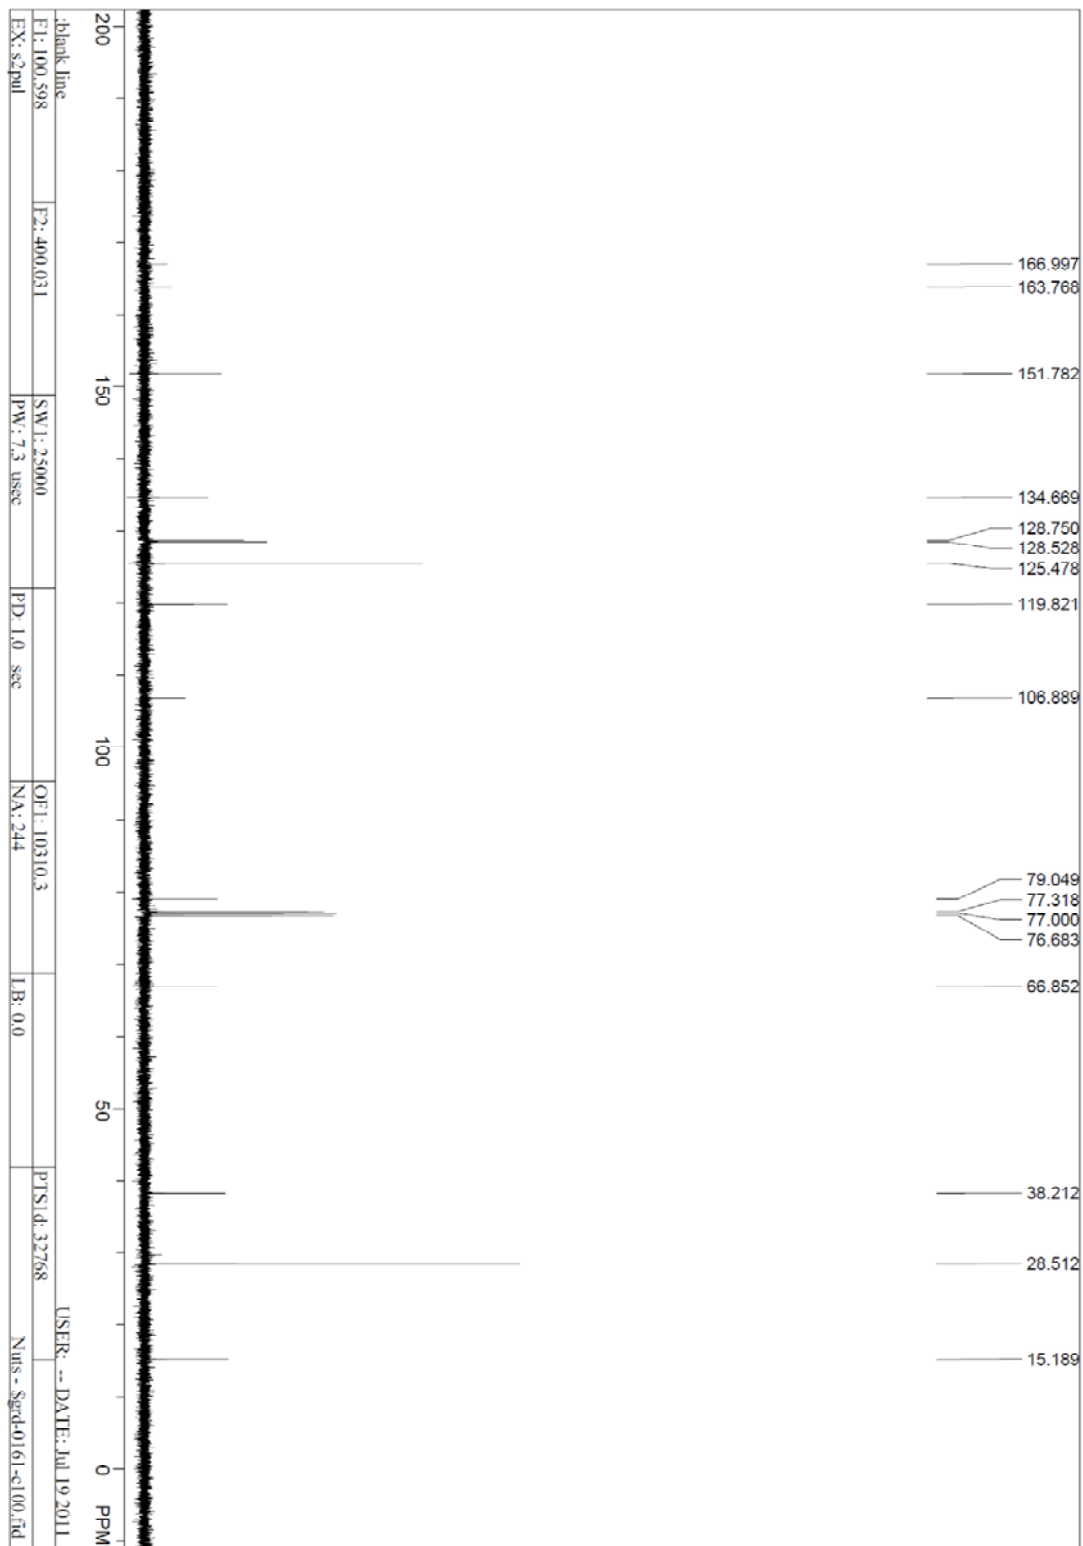

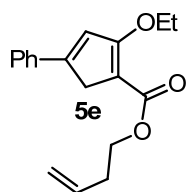

$^1\text{H NMR}$  (300 MHz in  $\text{CDCl}_3$ )

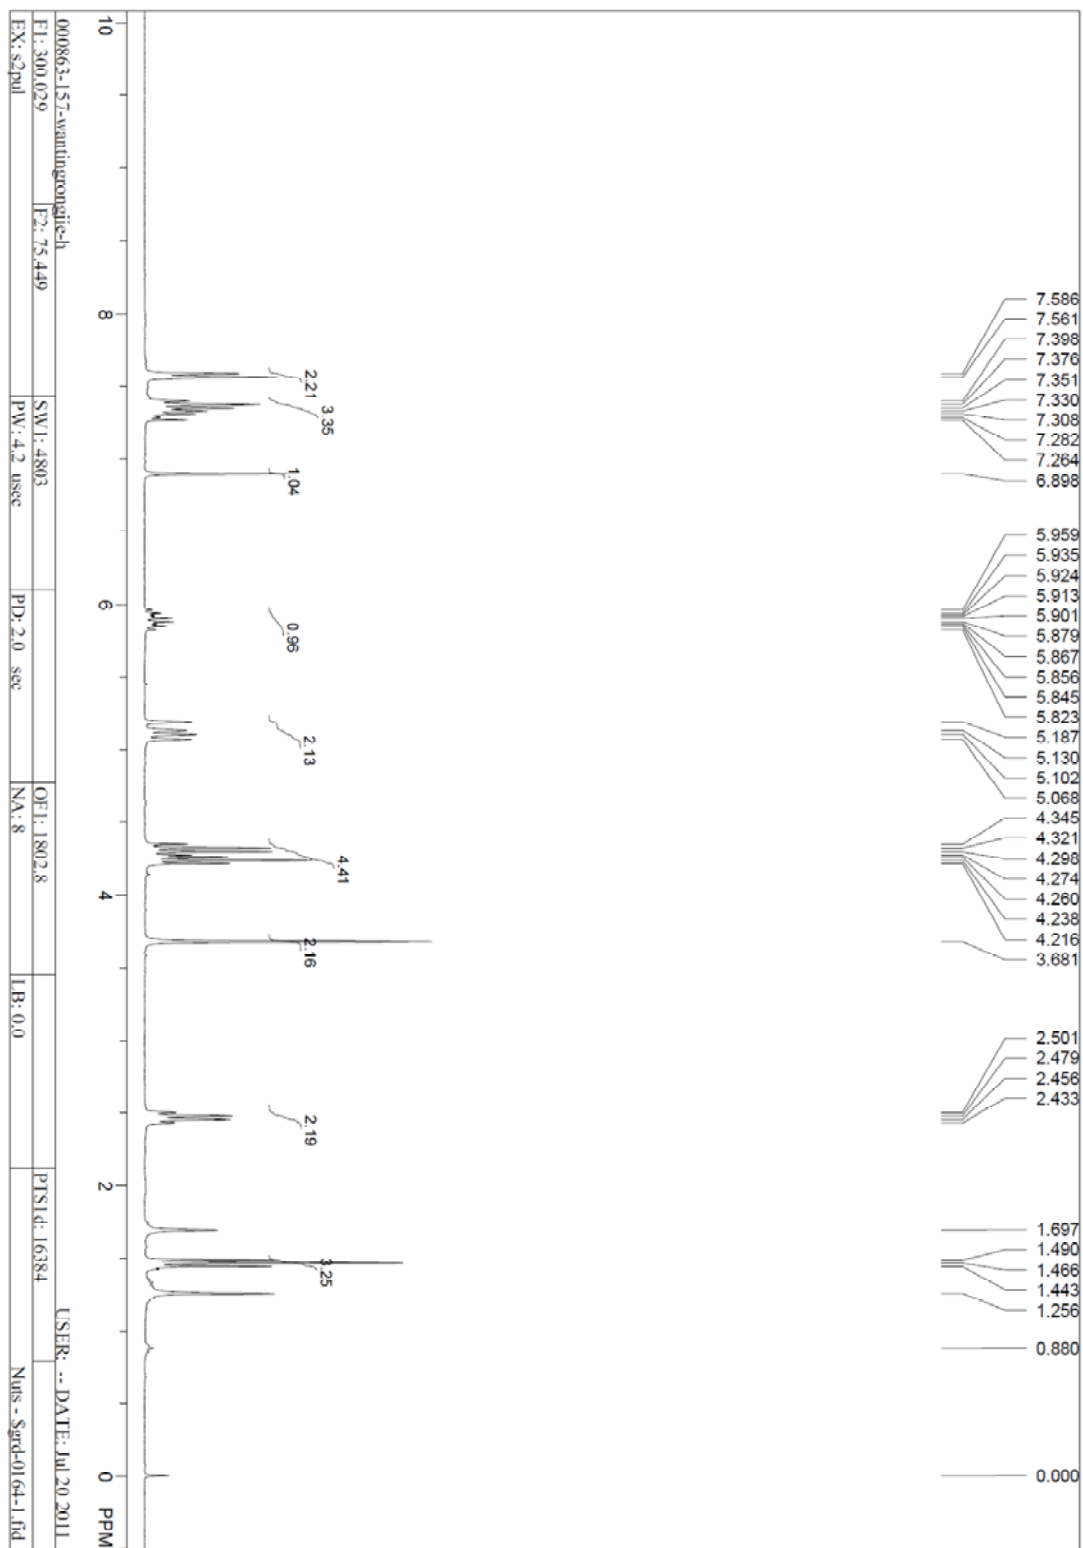

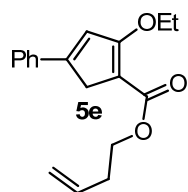

<sup>13</sup>C NMR (75 M Hz in CDCl<sub>3</sub>)

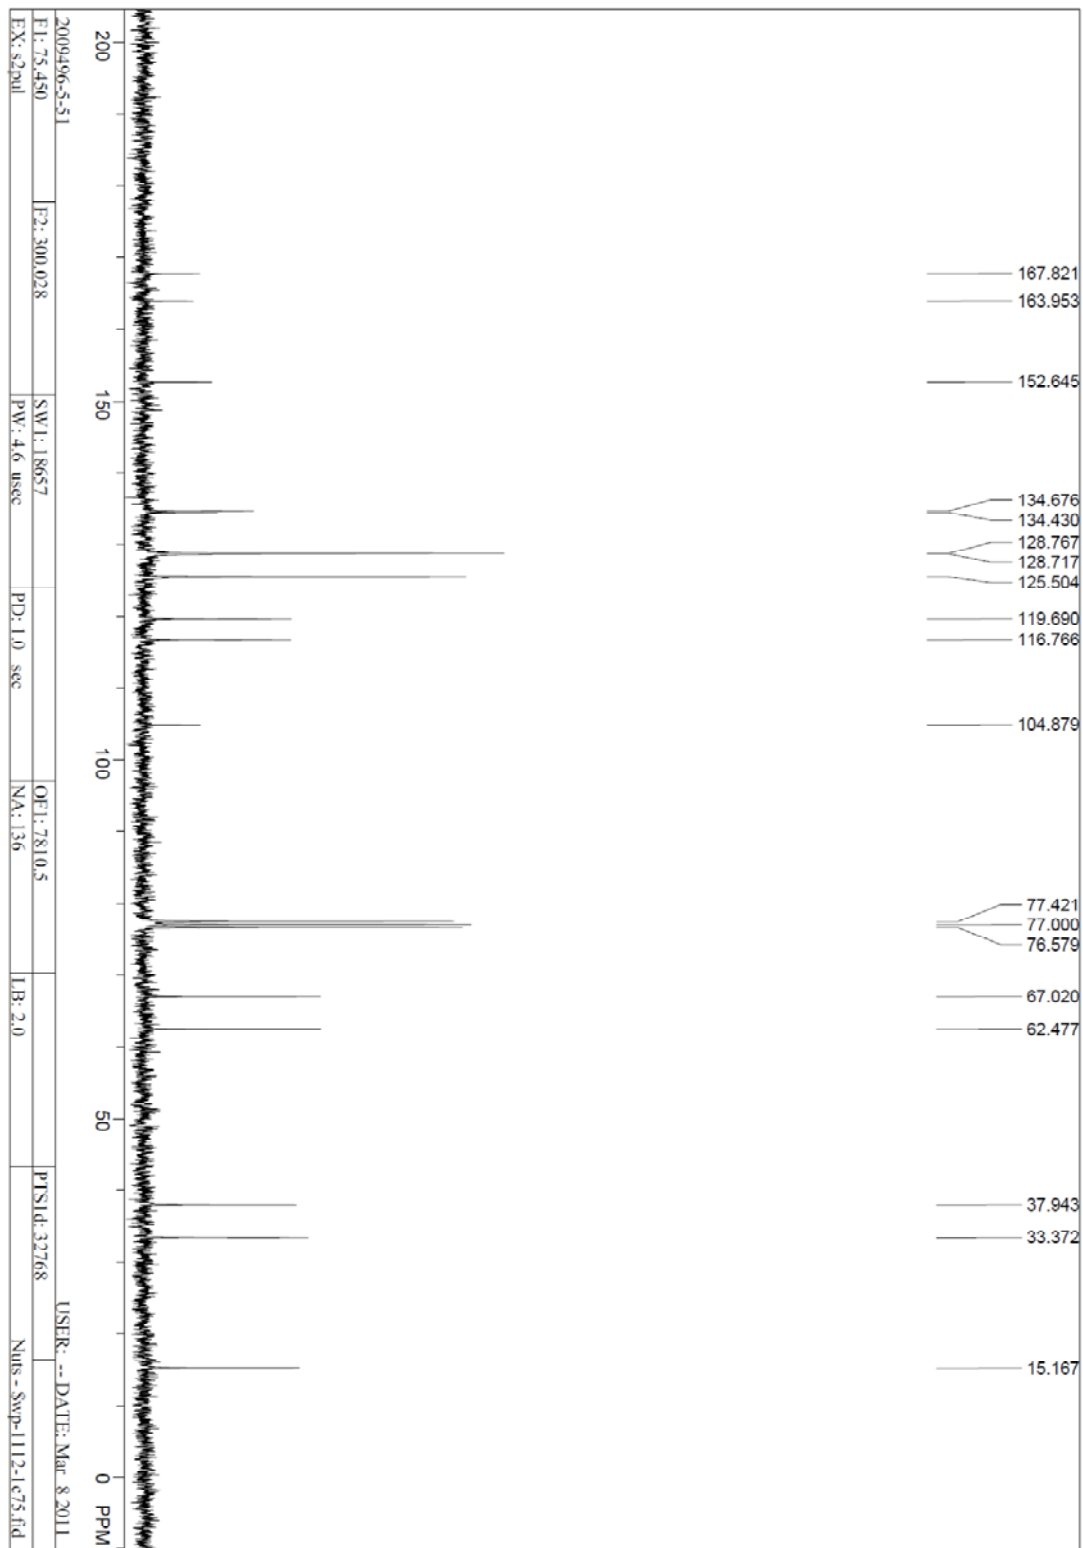

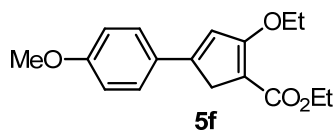

<sup>1</sup>H NMR (400 MHz in CDCl<sub>3</sub>)

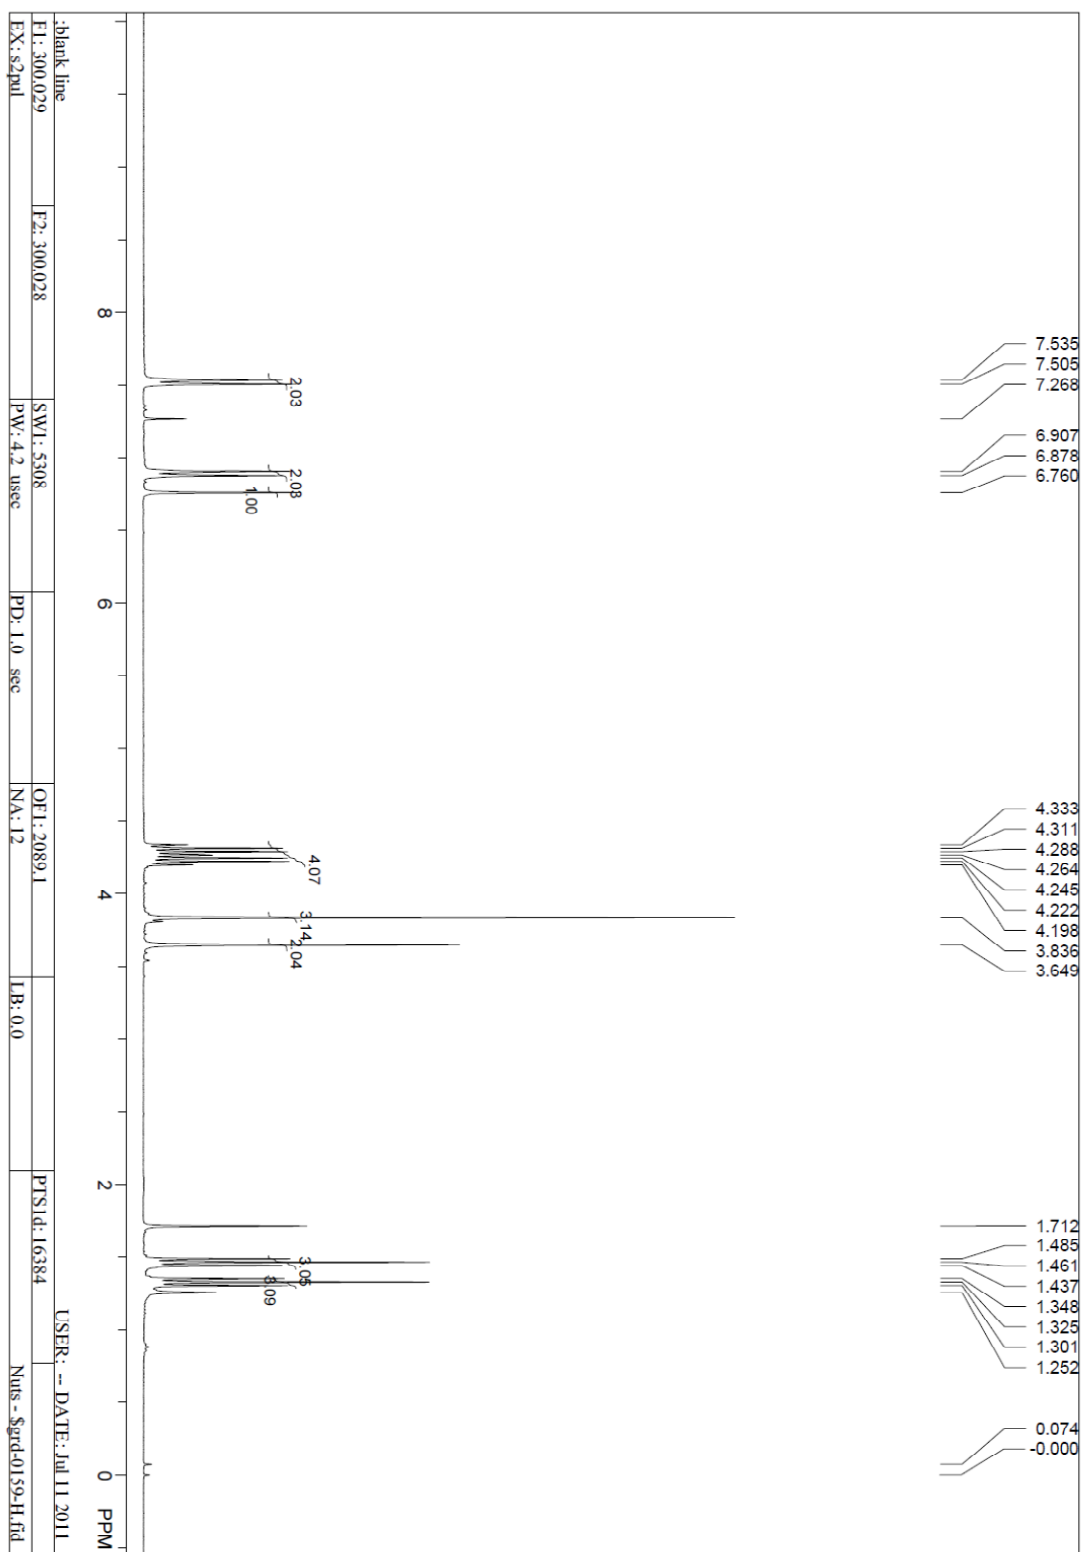



$^{13}\text{C}$  NMR (100 MHz in  $\text{CDCl}_3$ )

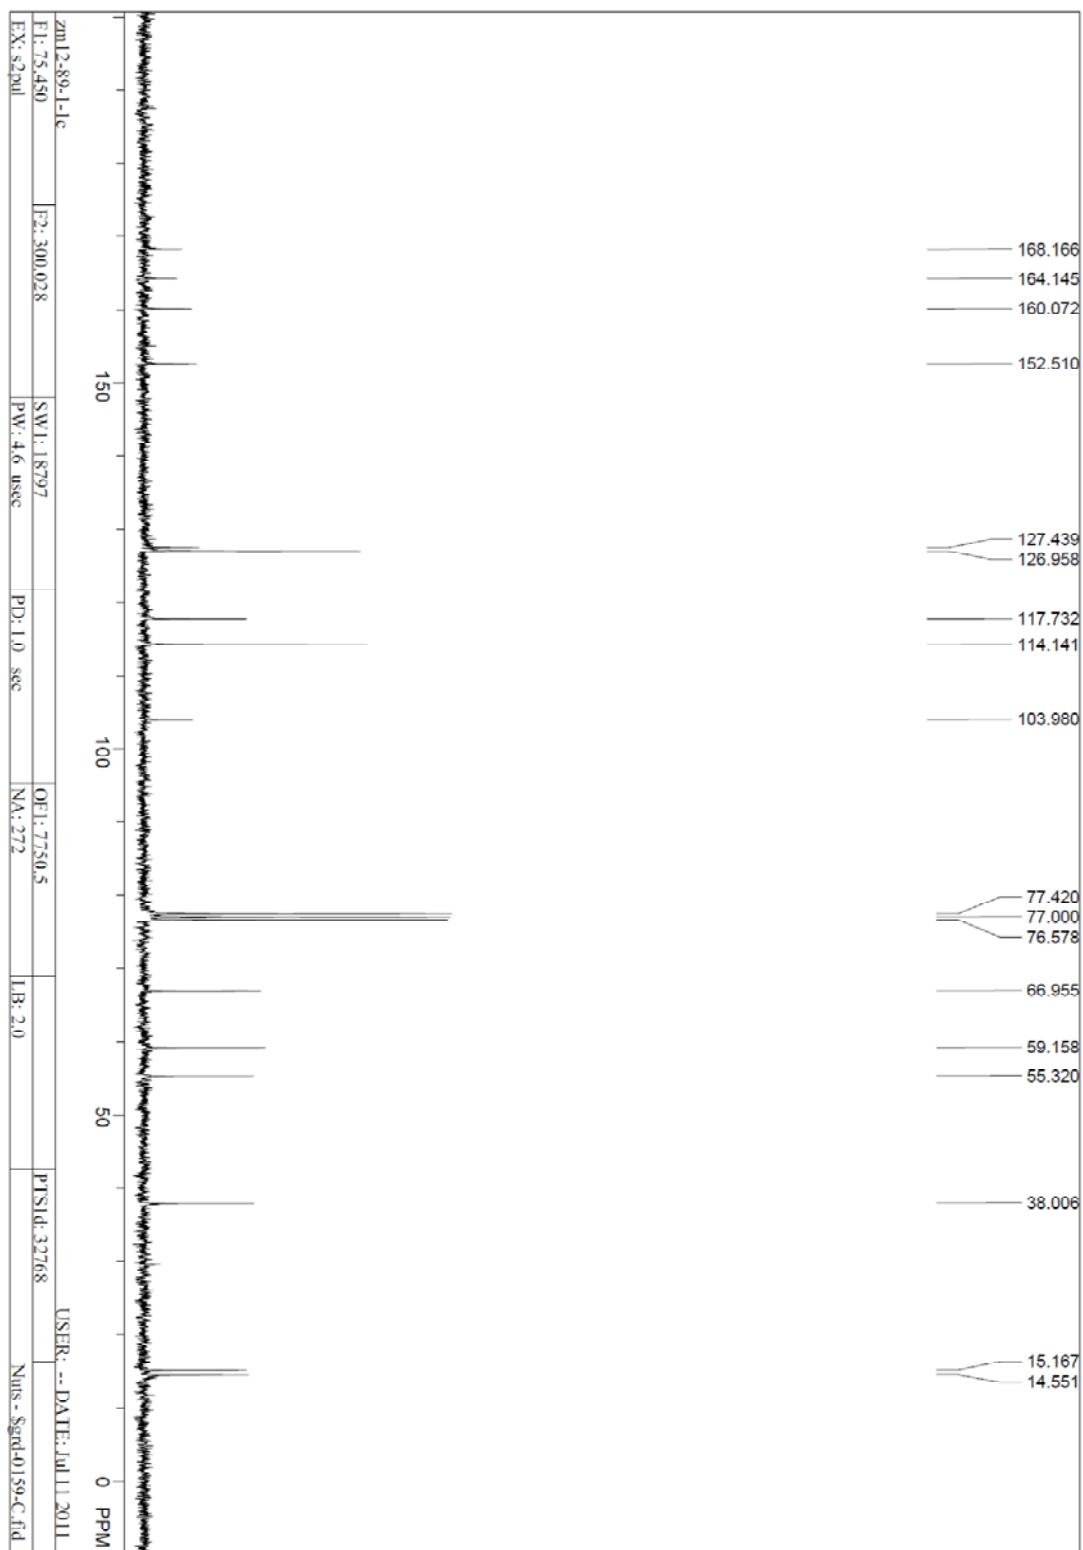

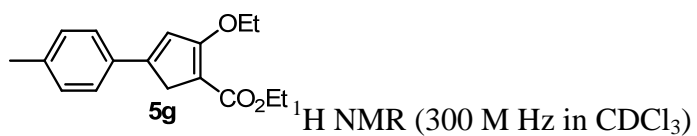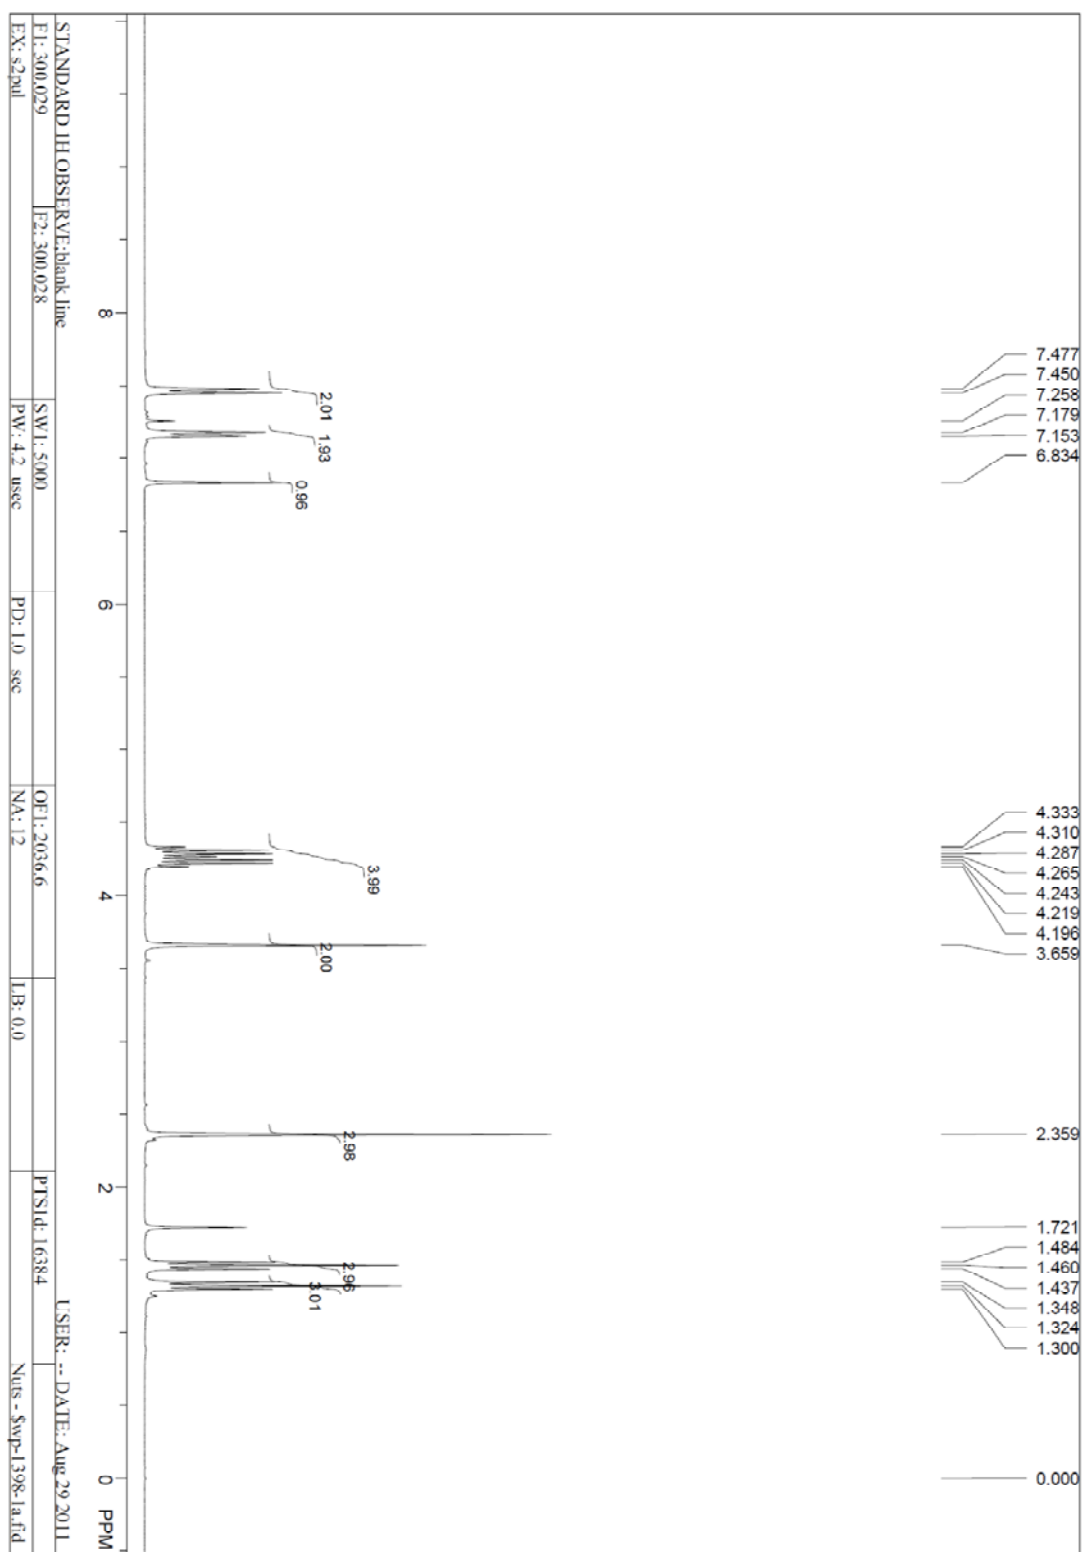

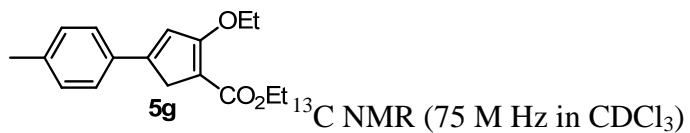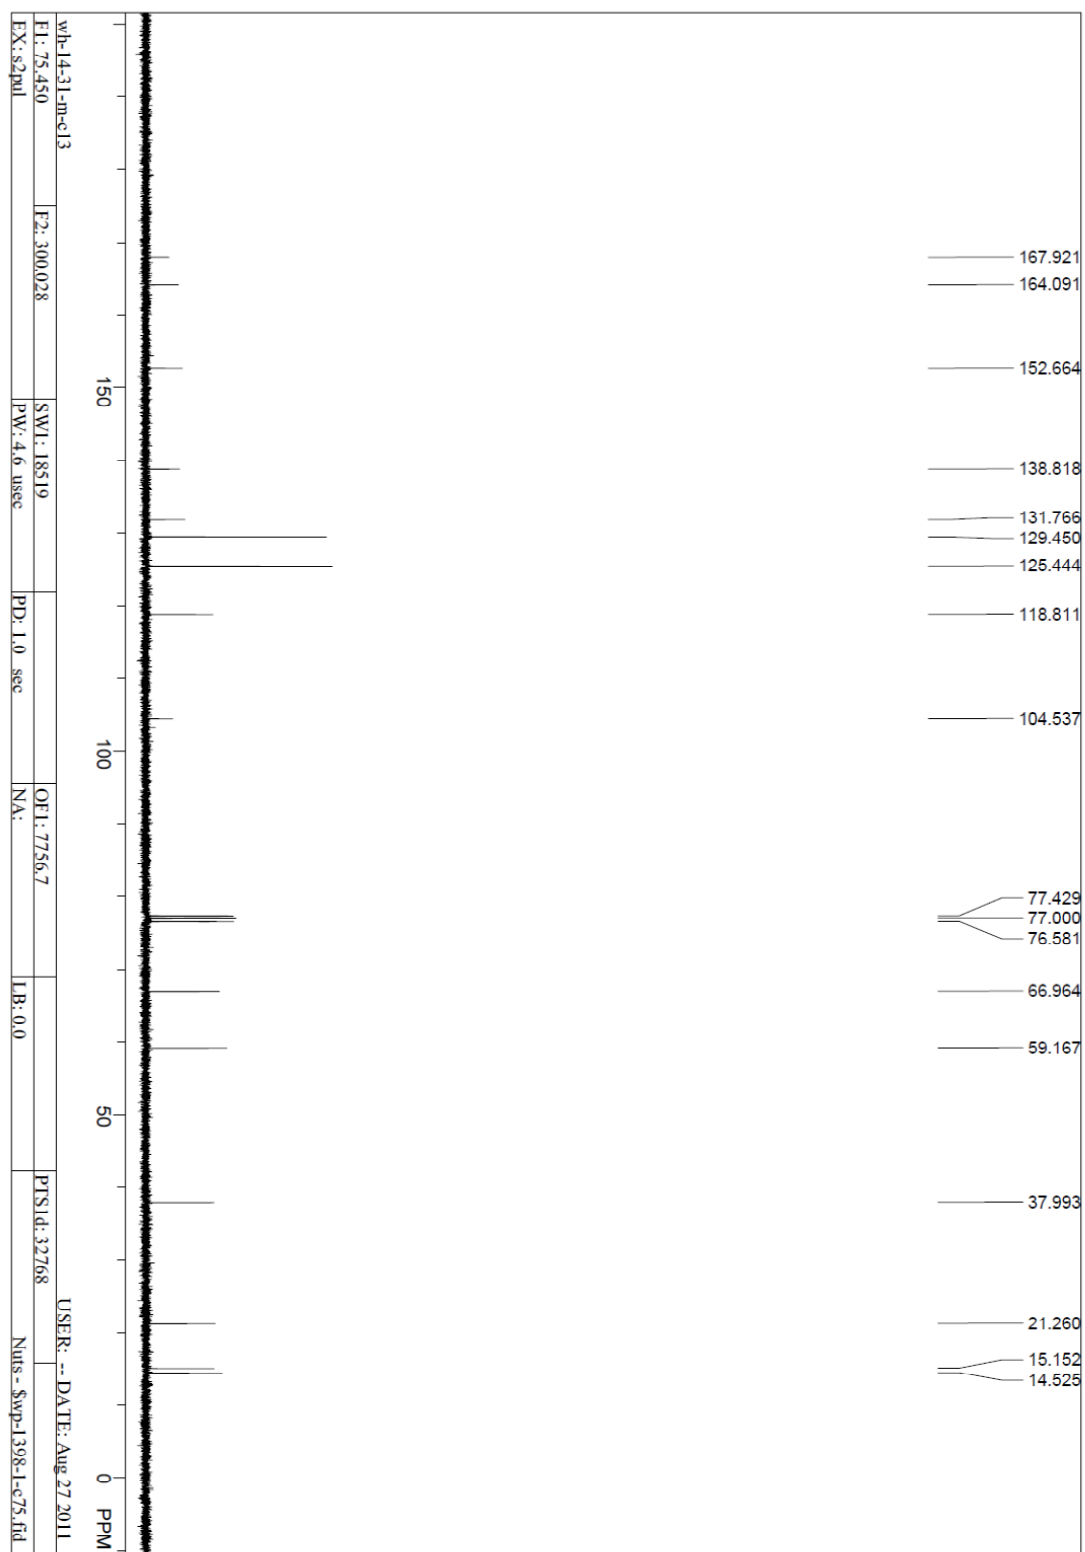



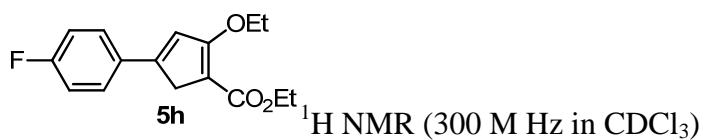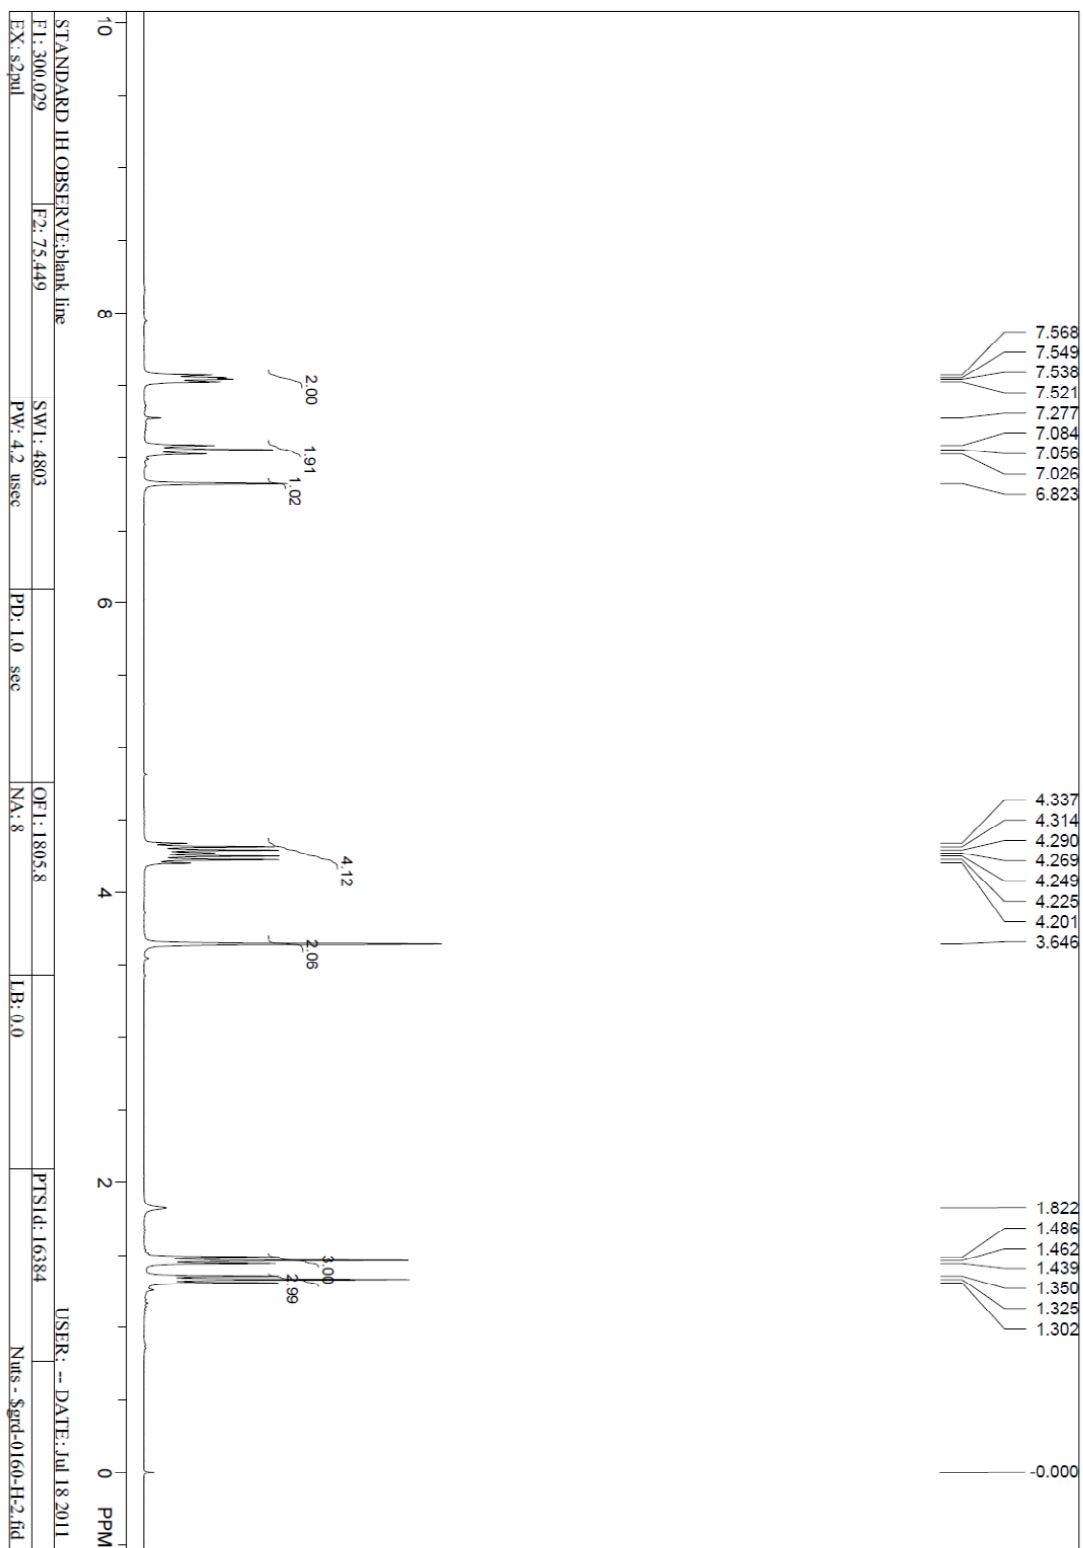

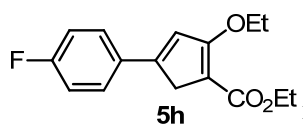

$^{13}\text{C}$  NMR (100 MHz in  $\text{CDCl}_3$ )

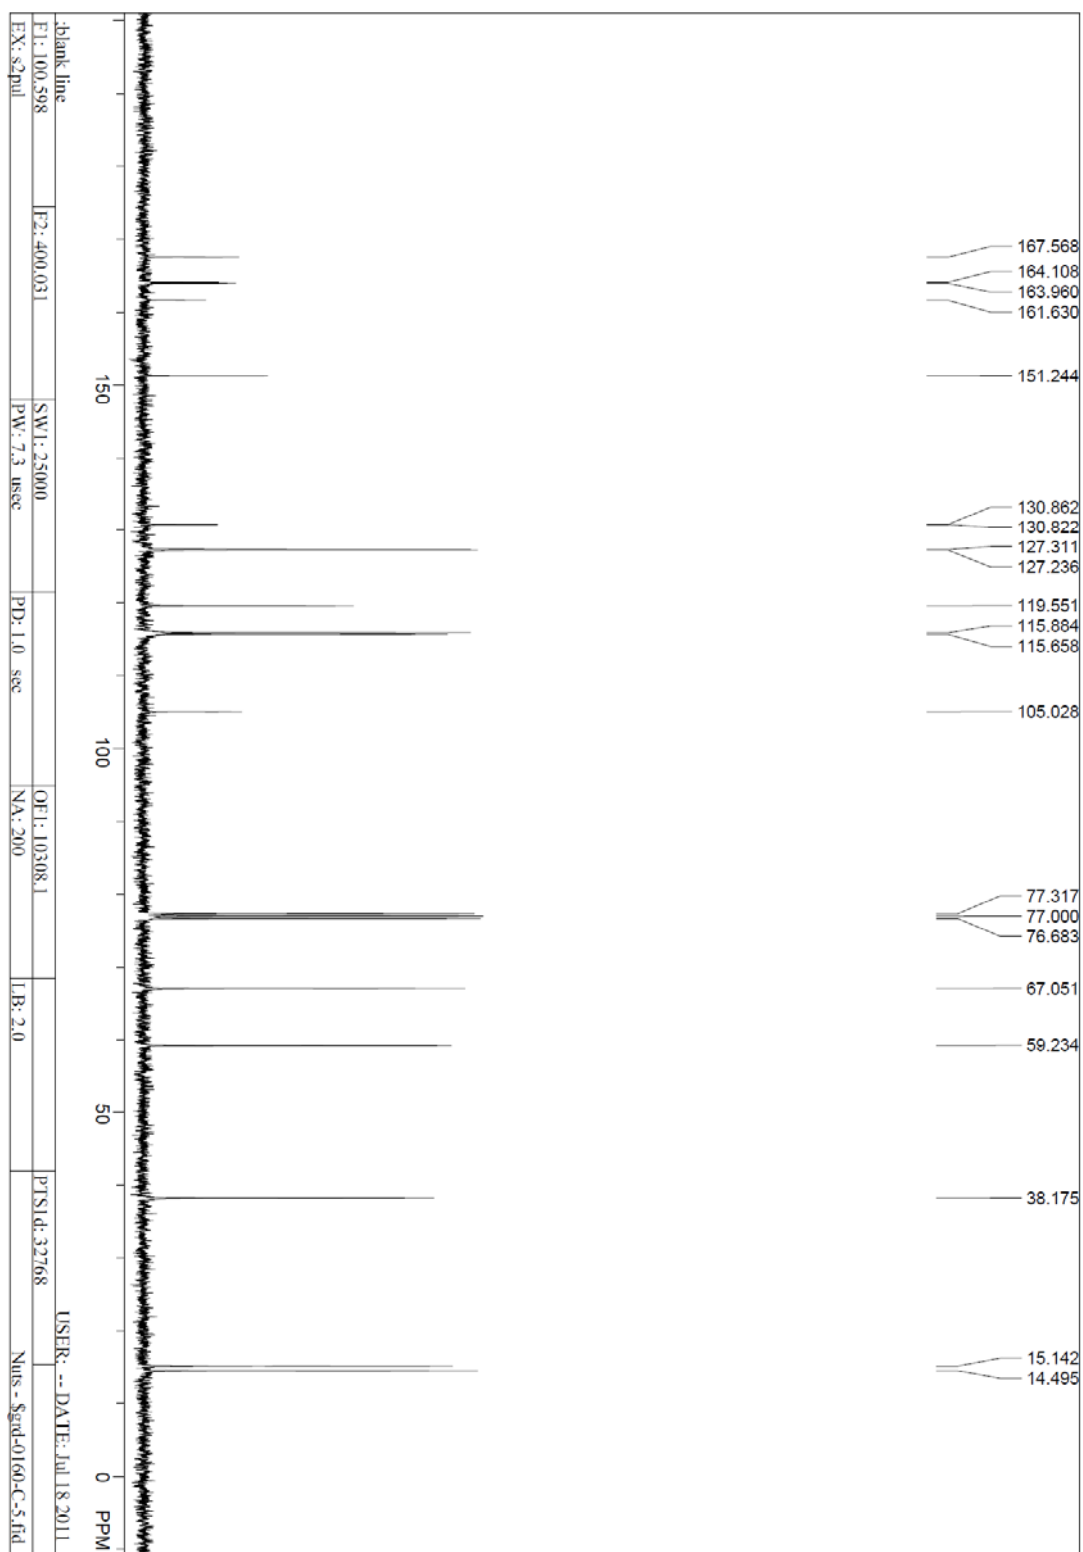

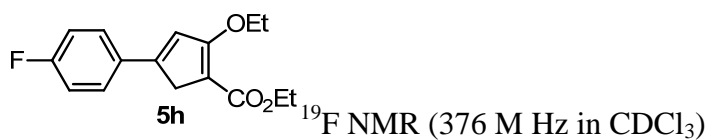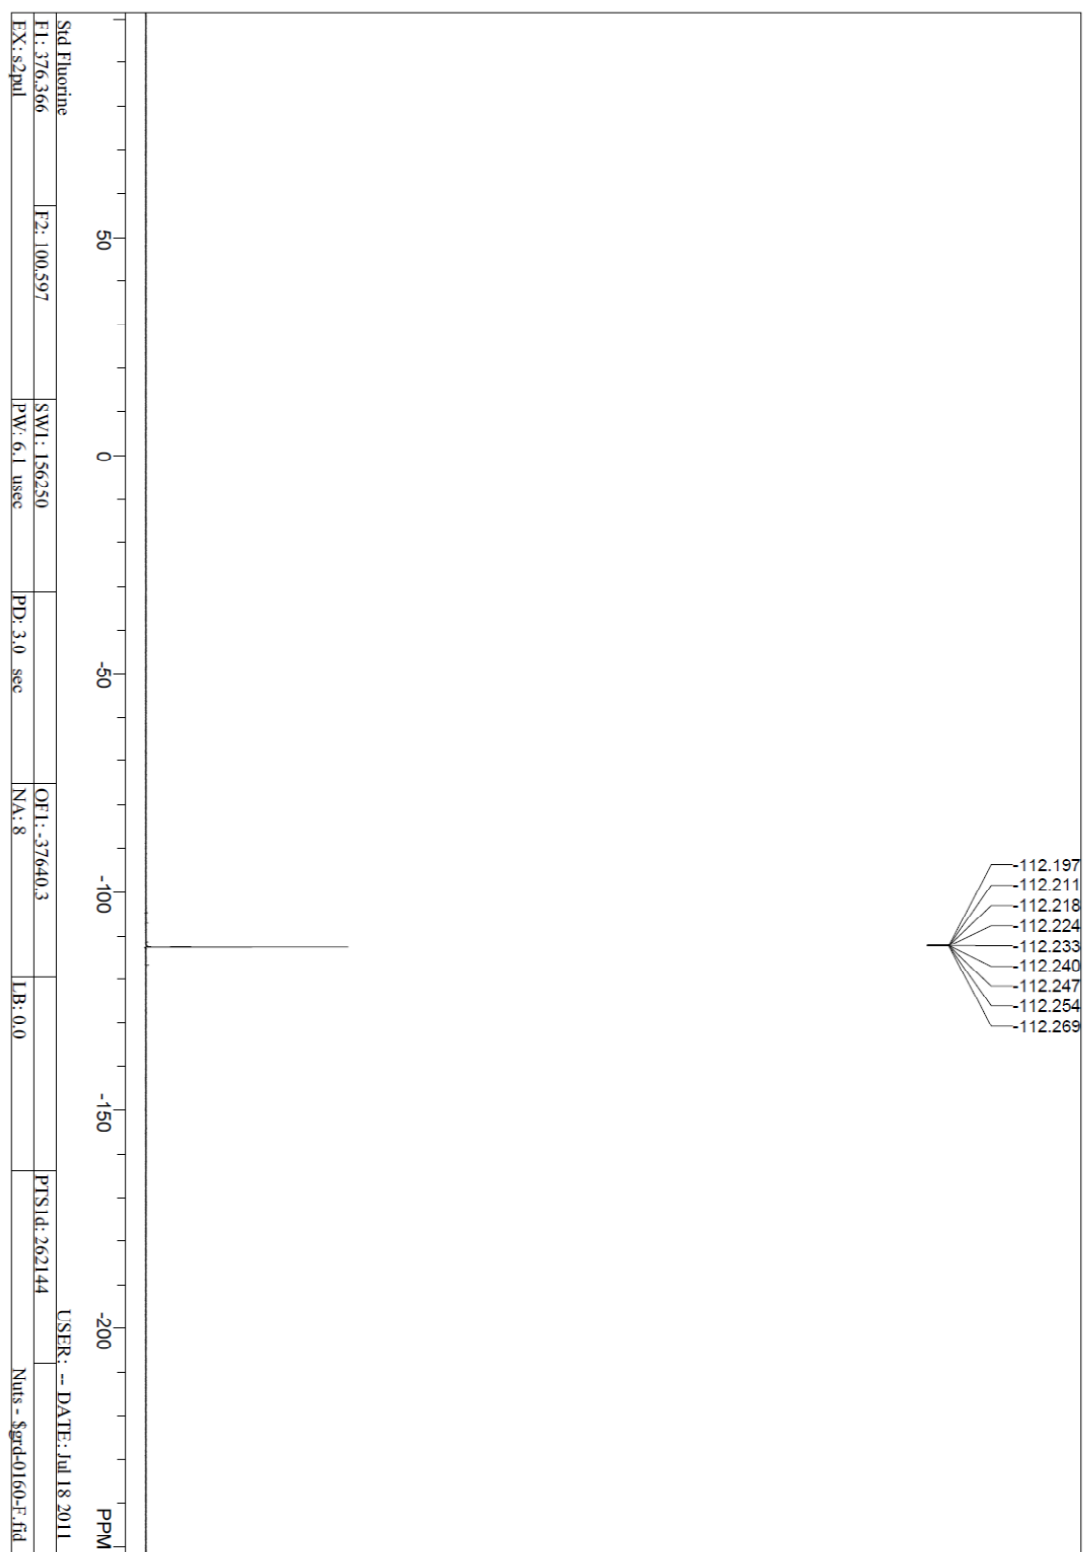

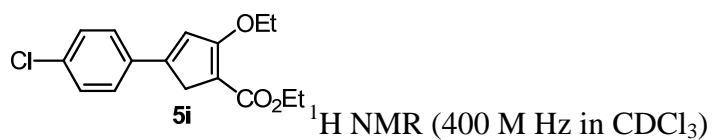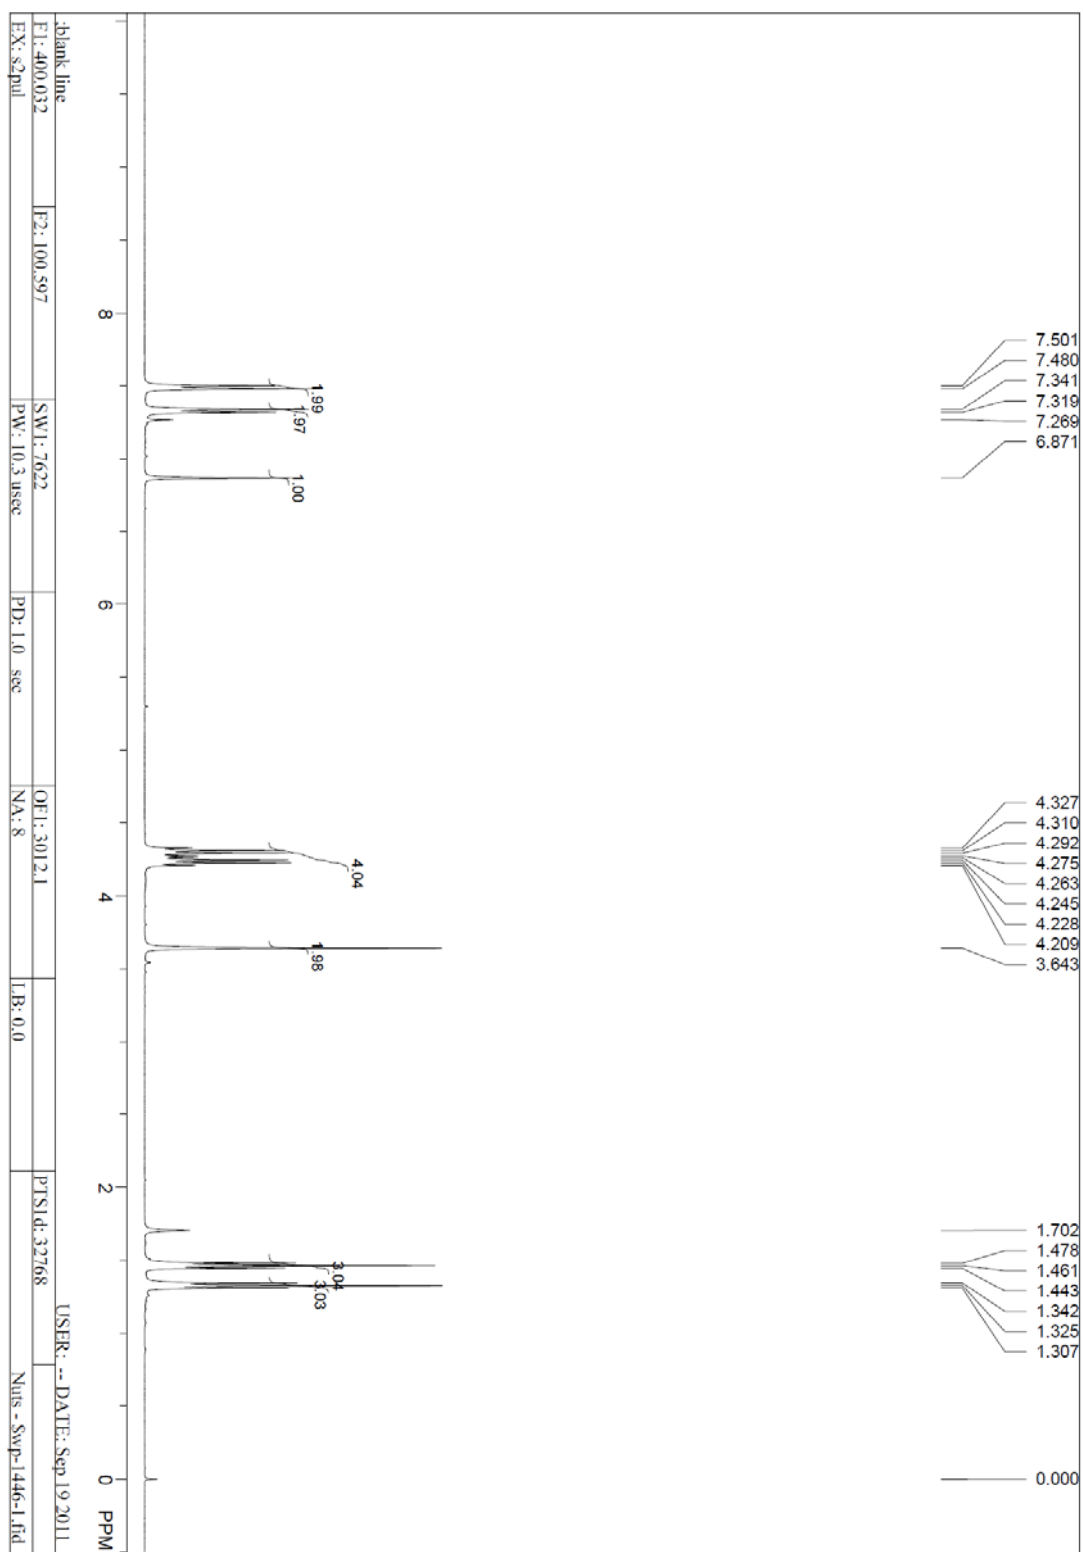

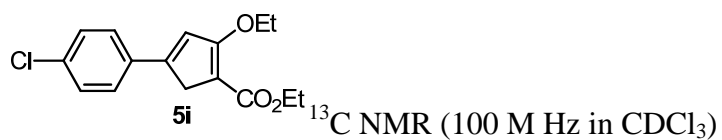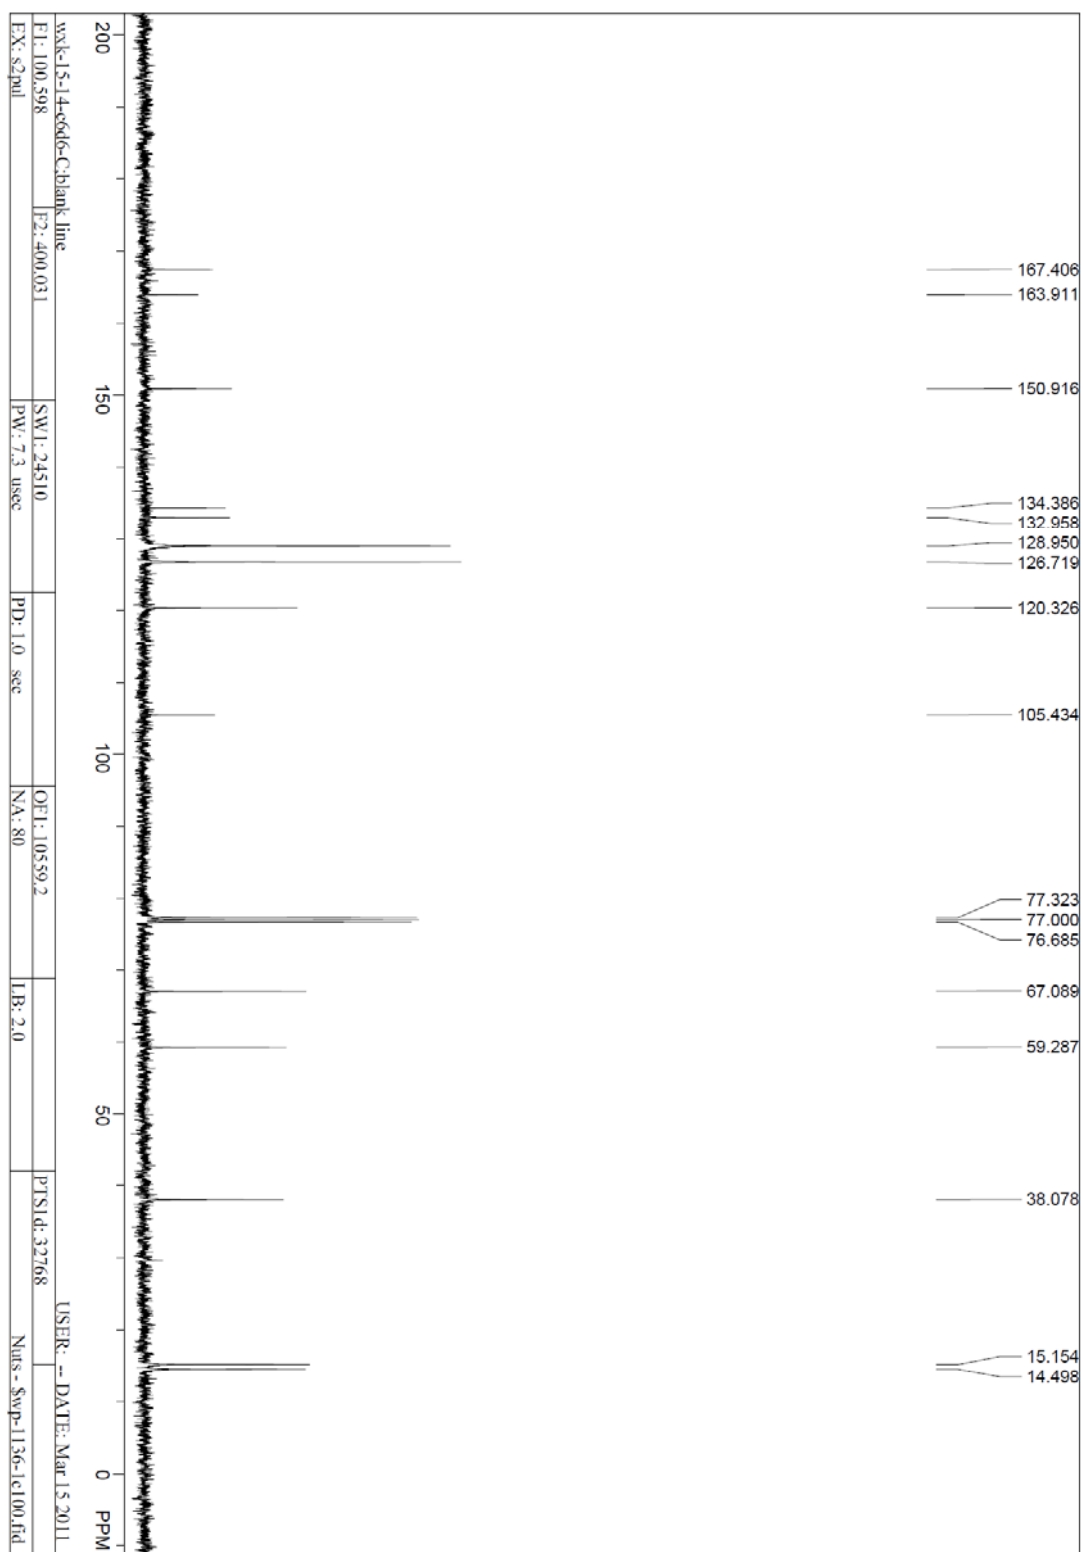

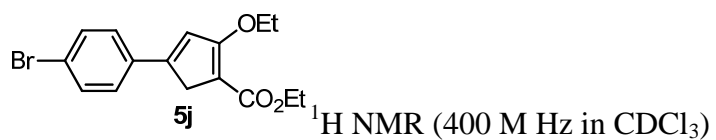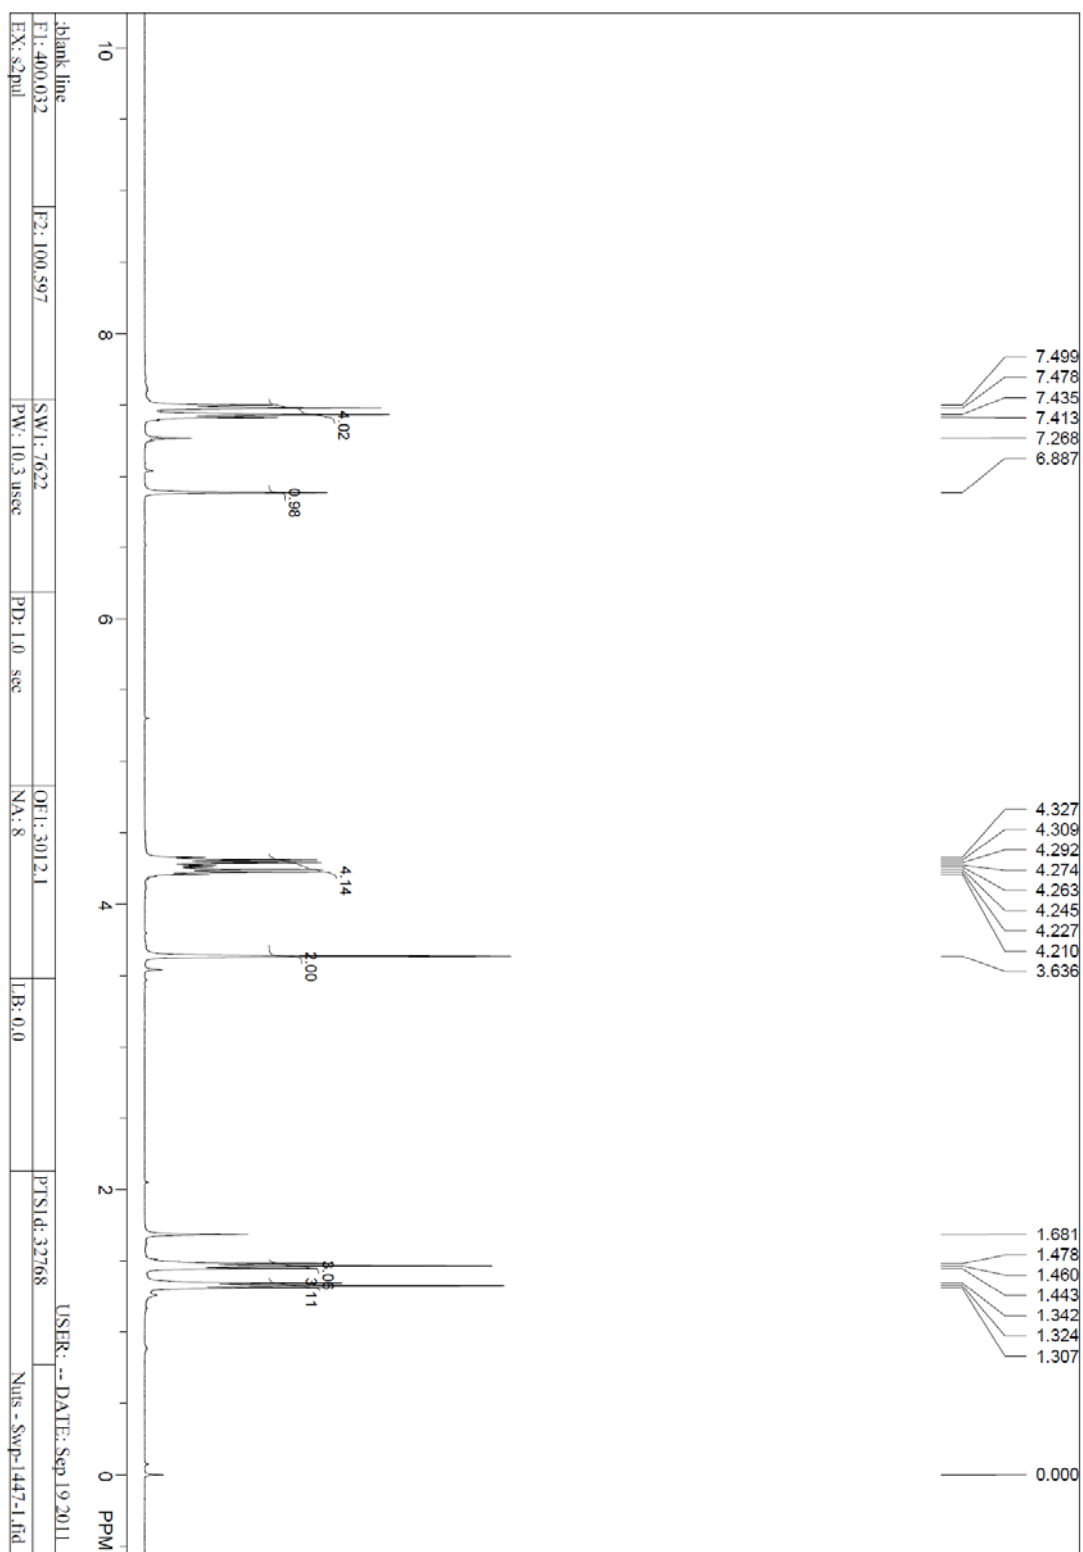



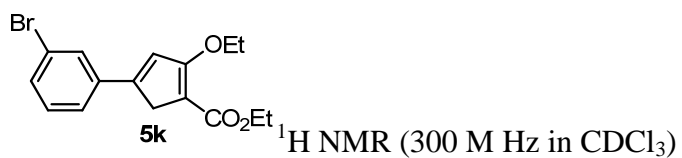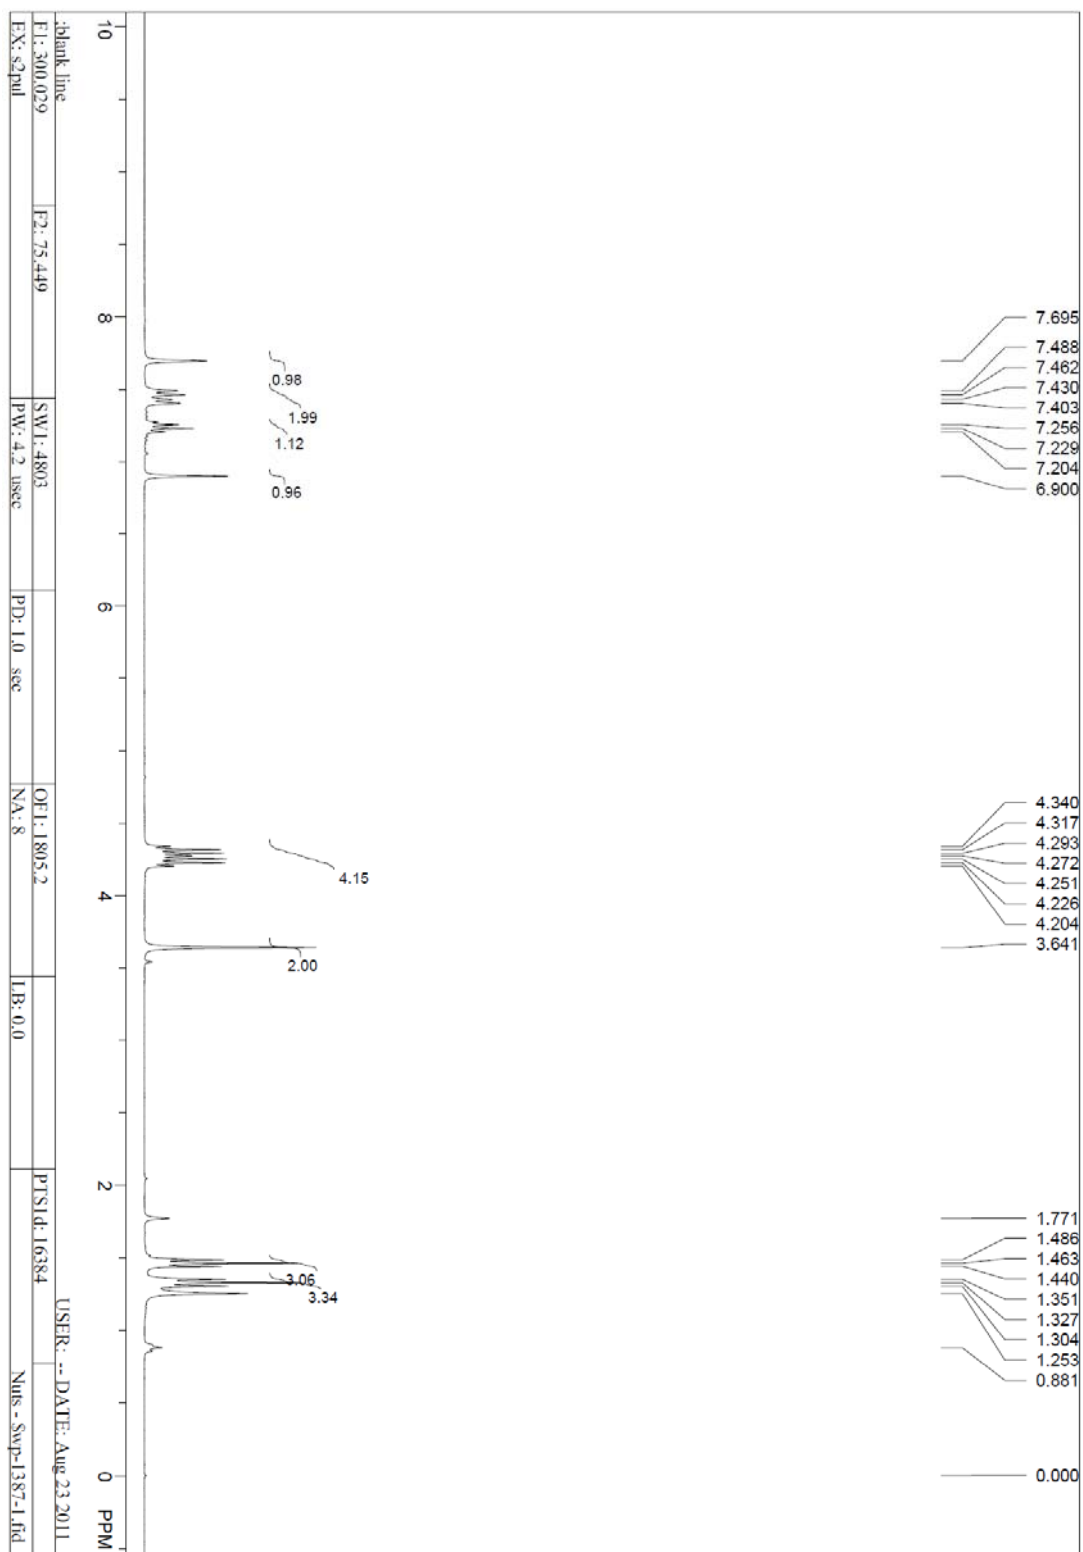



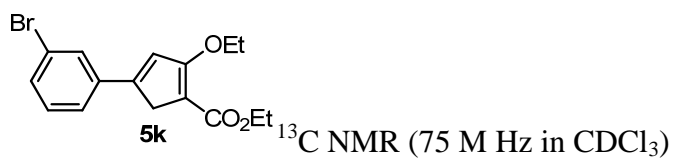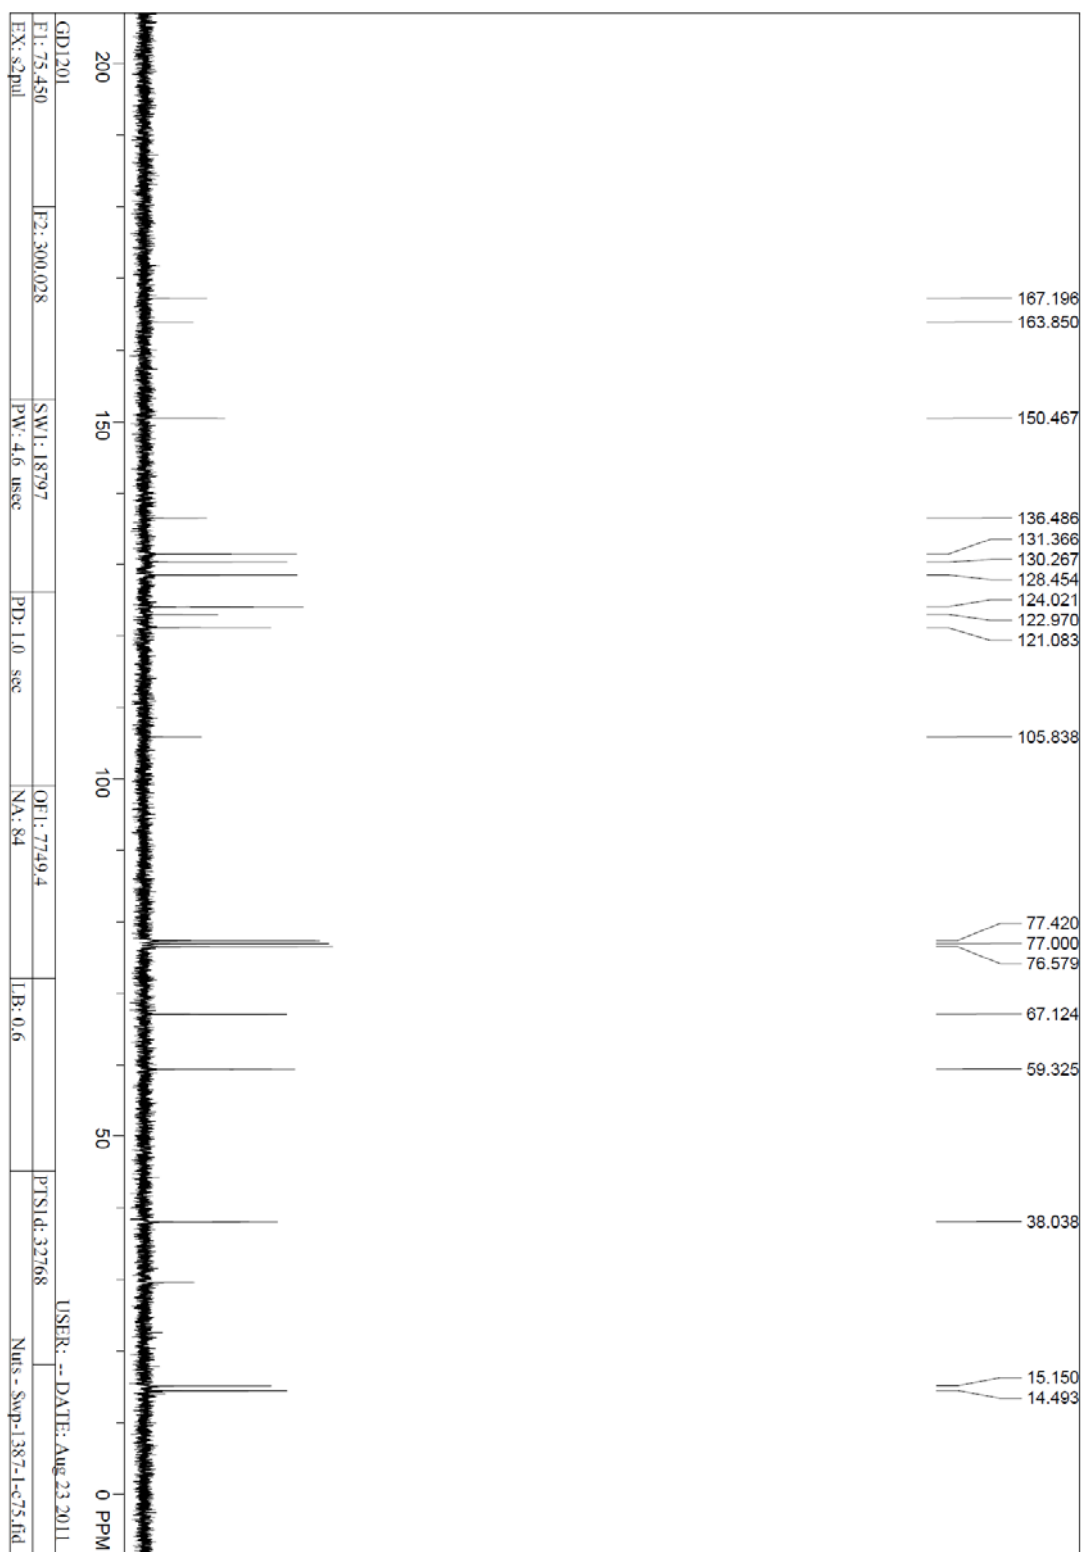

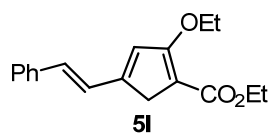

<sup>1</sup>H NMR (300 MHz in CDCl<sub>3</sub>)

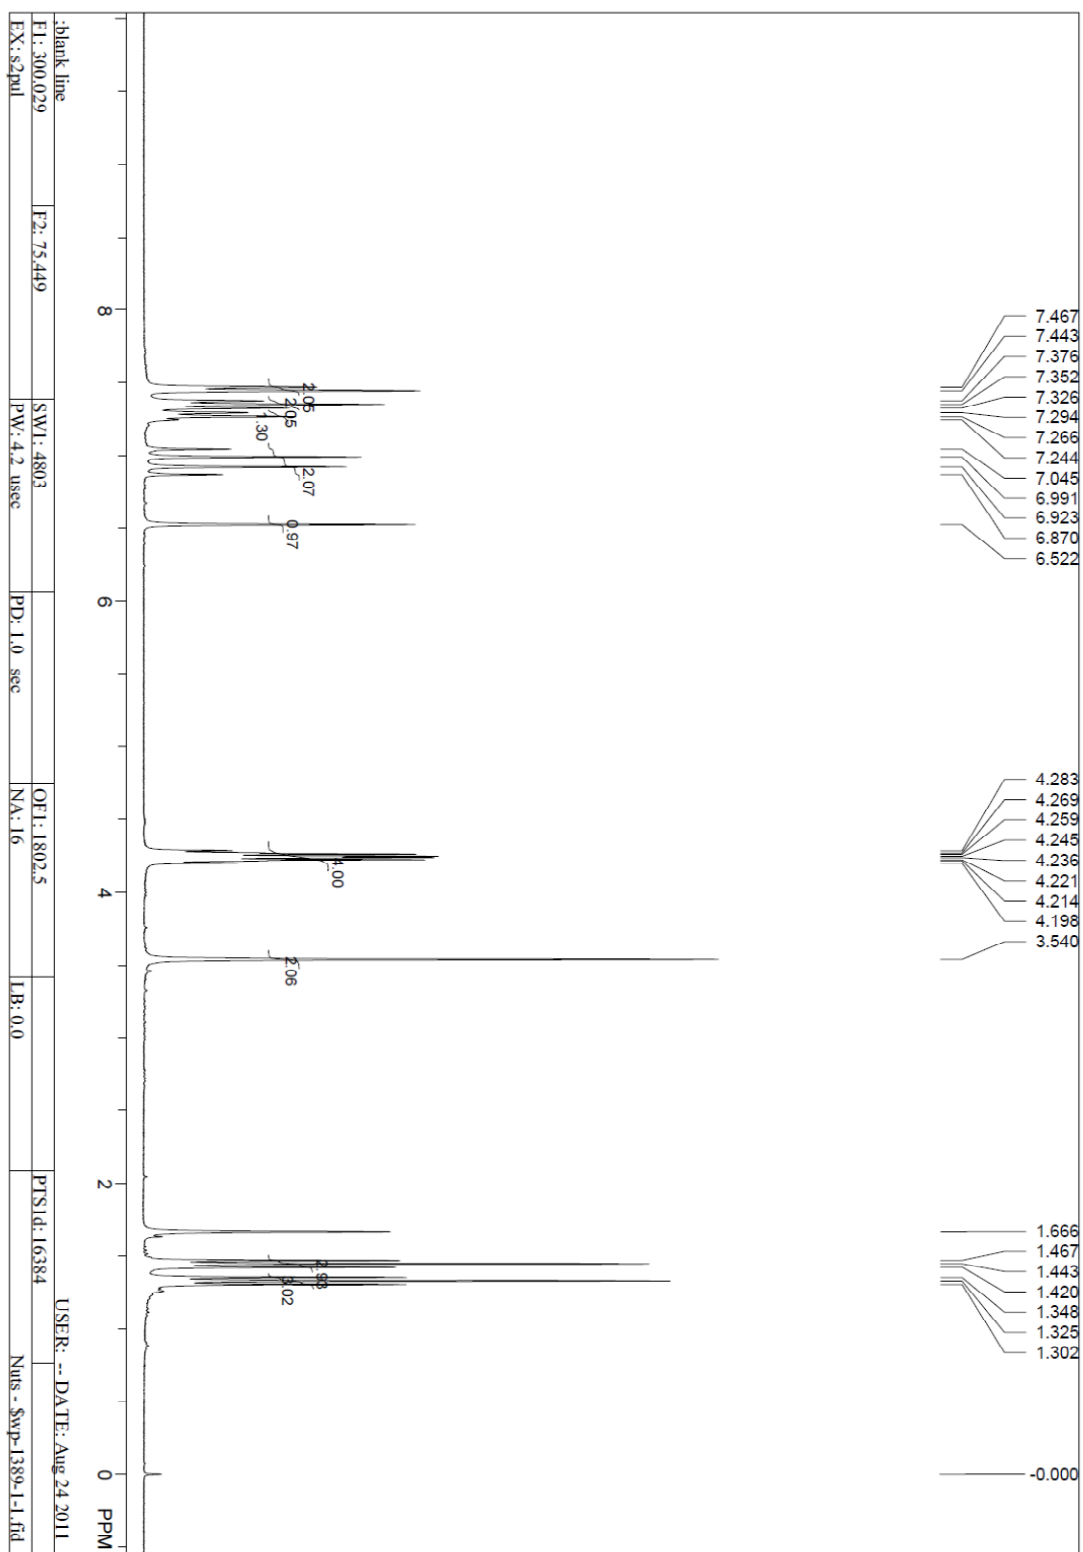



$^{13}\text{C}$  NMR (75 M Hz in  $\text{CDCl}_3$ )

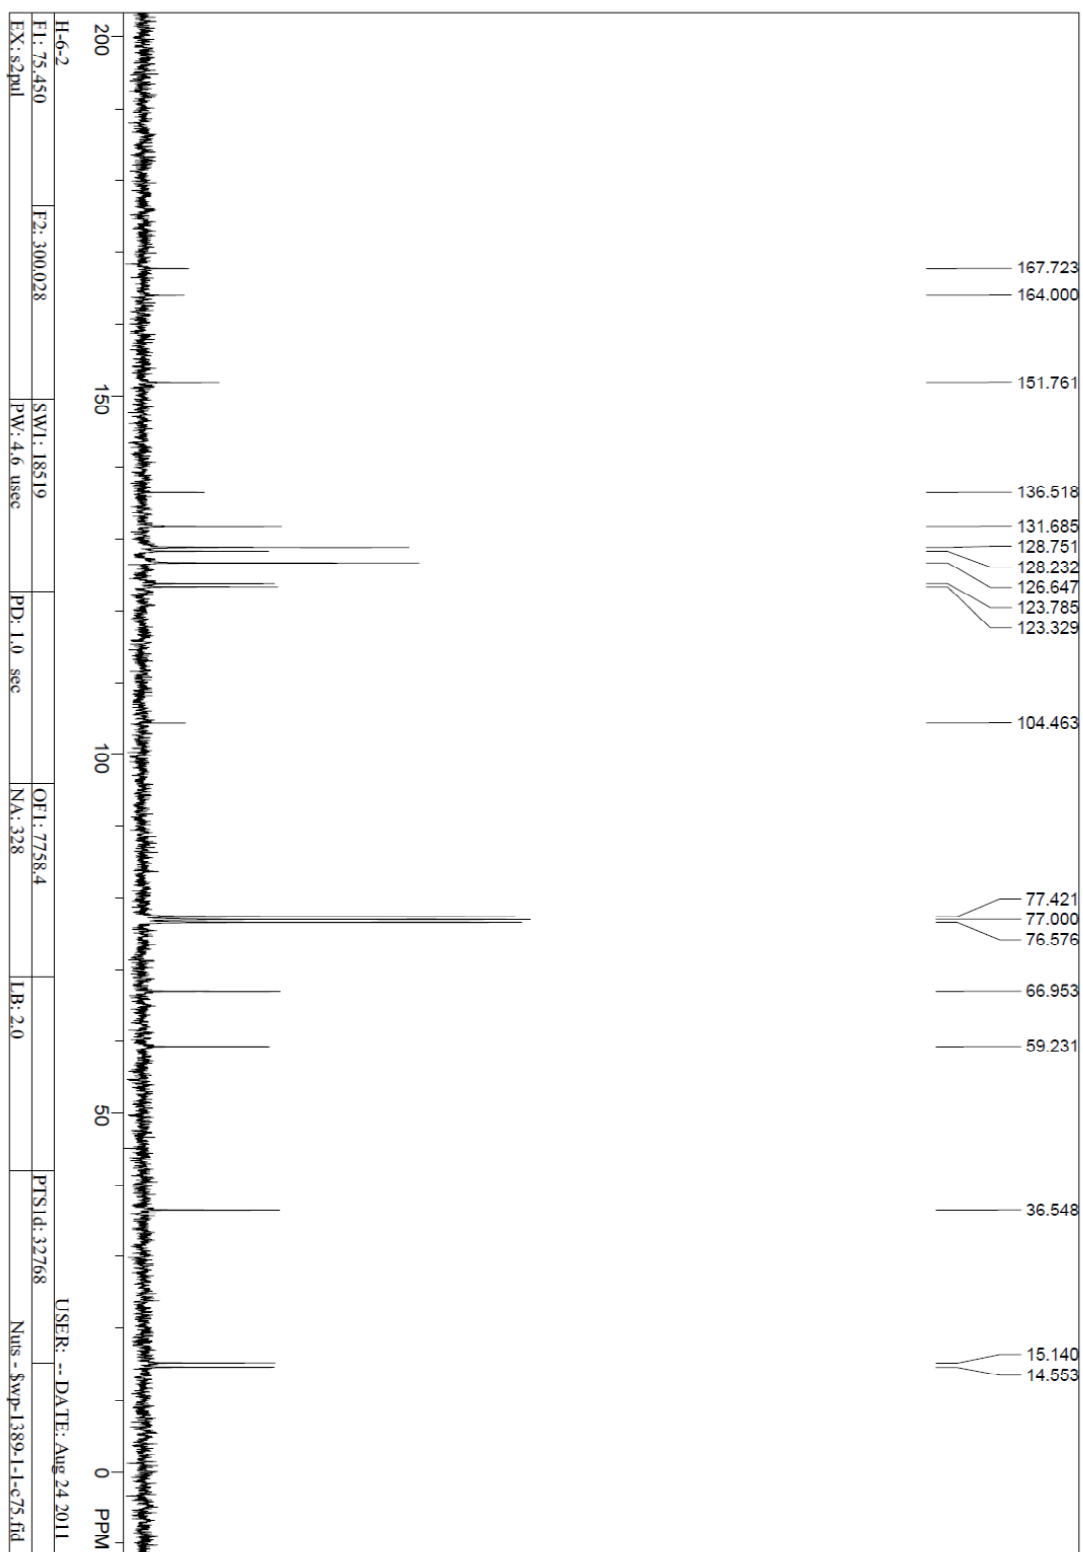

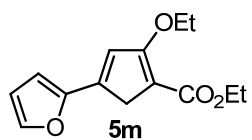

$^1\text{H NMR}$  (300 M Hz in  $\text{CDCl}_3$ )

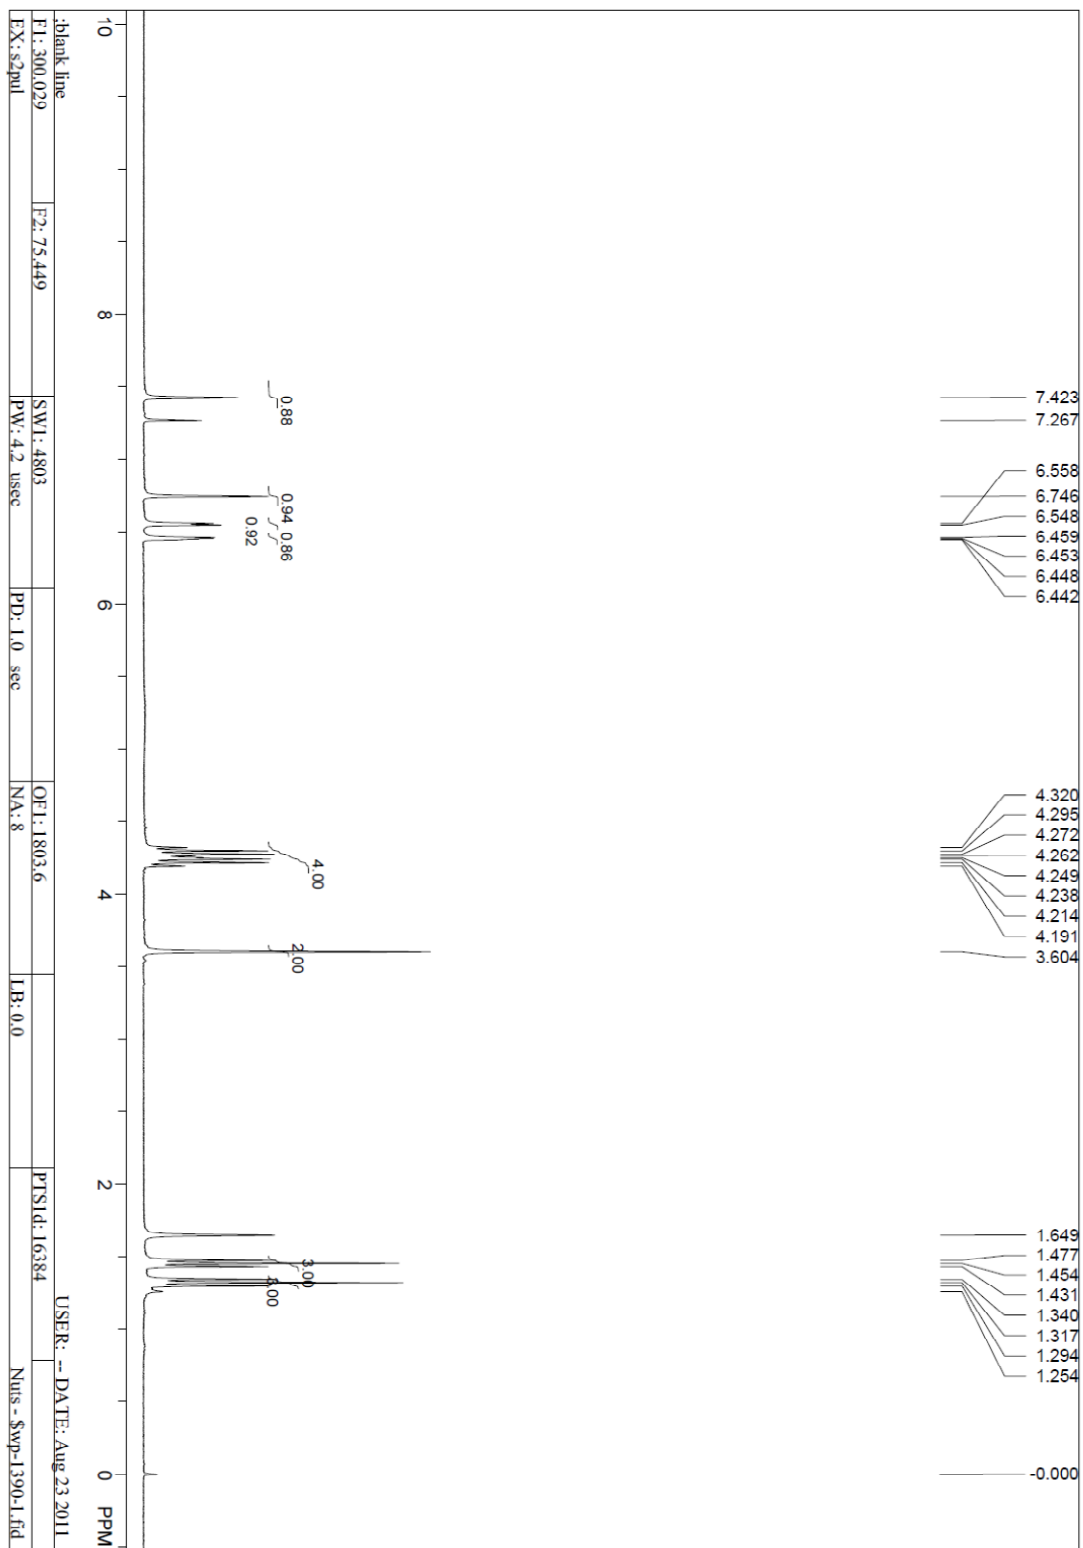

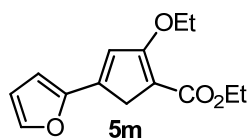

$^{13}\text{C}$  NMR (75 M Hz in  $\text{CDCl}_3$ )

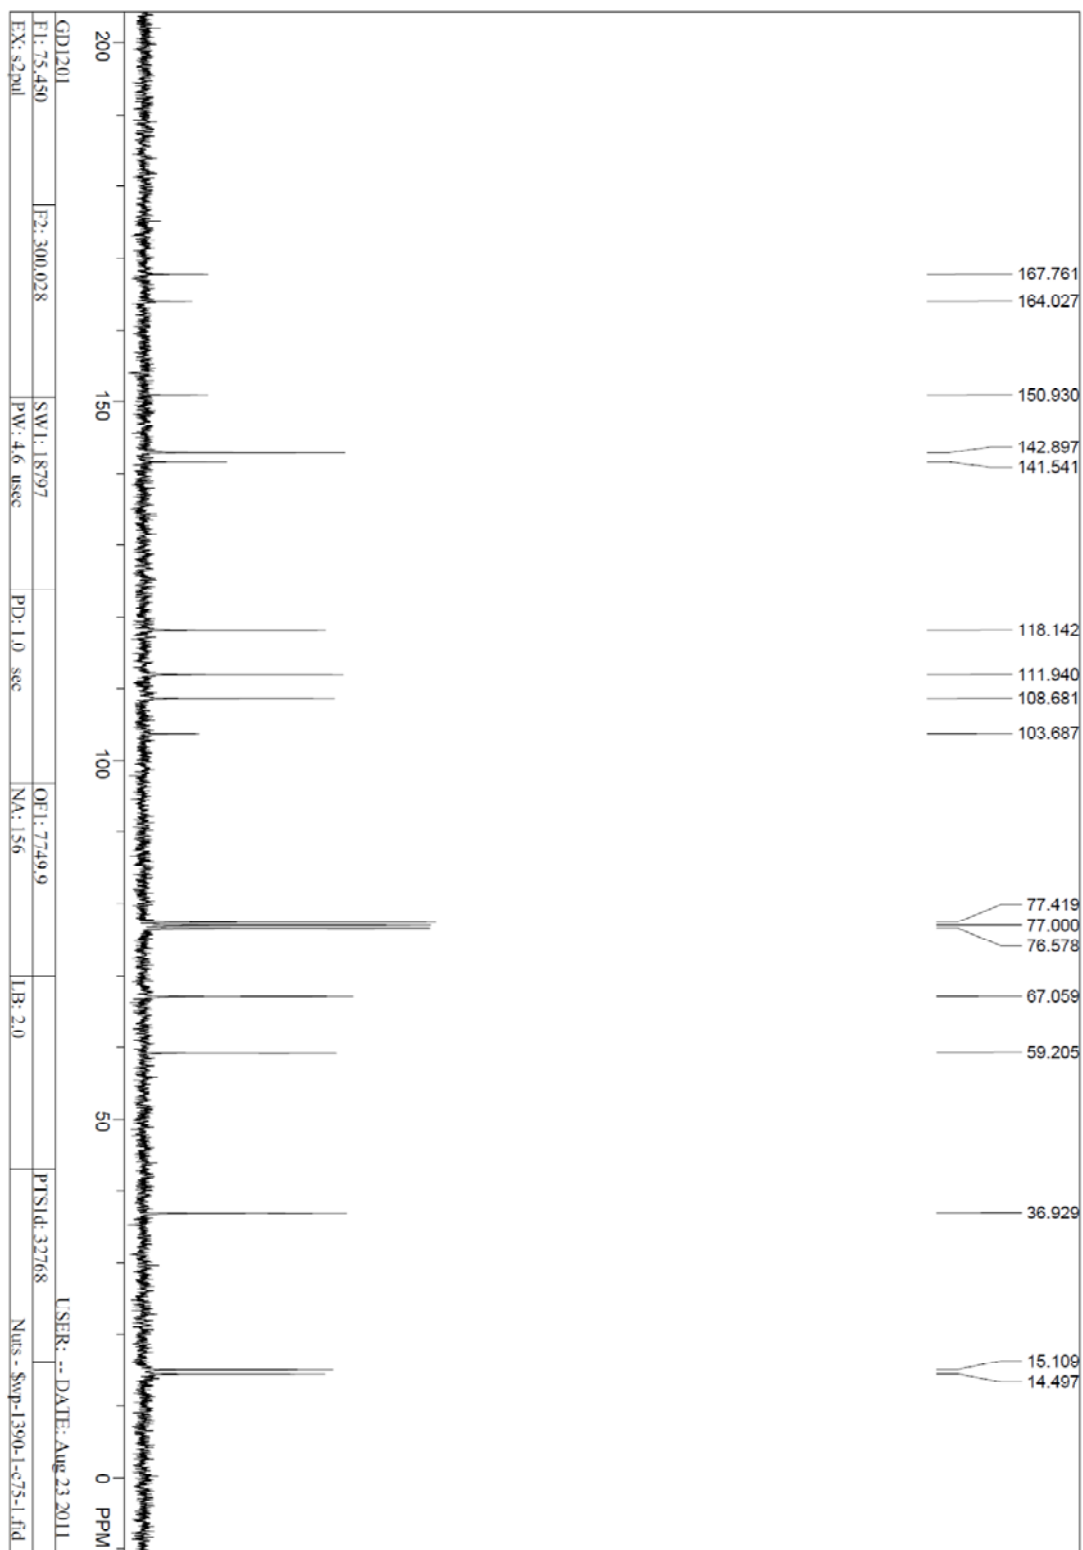

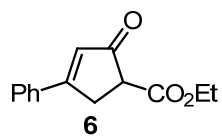

$^1\text{H NMR}$  (400 M Hz in  $\text{CDCl}_3$ )

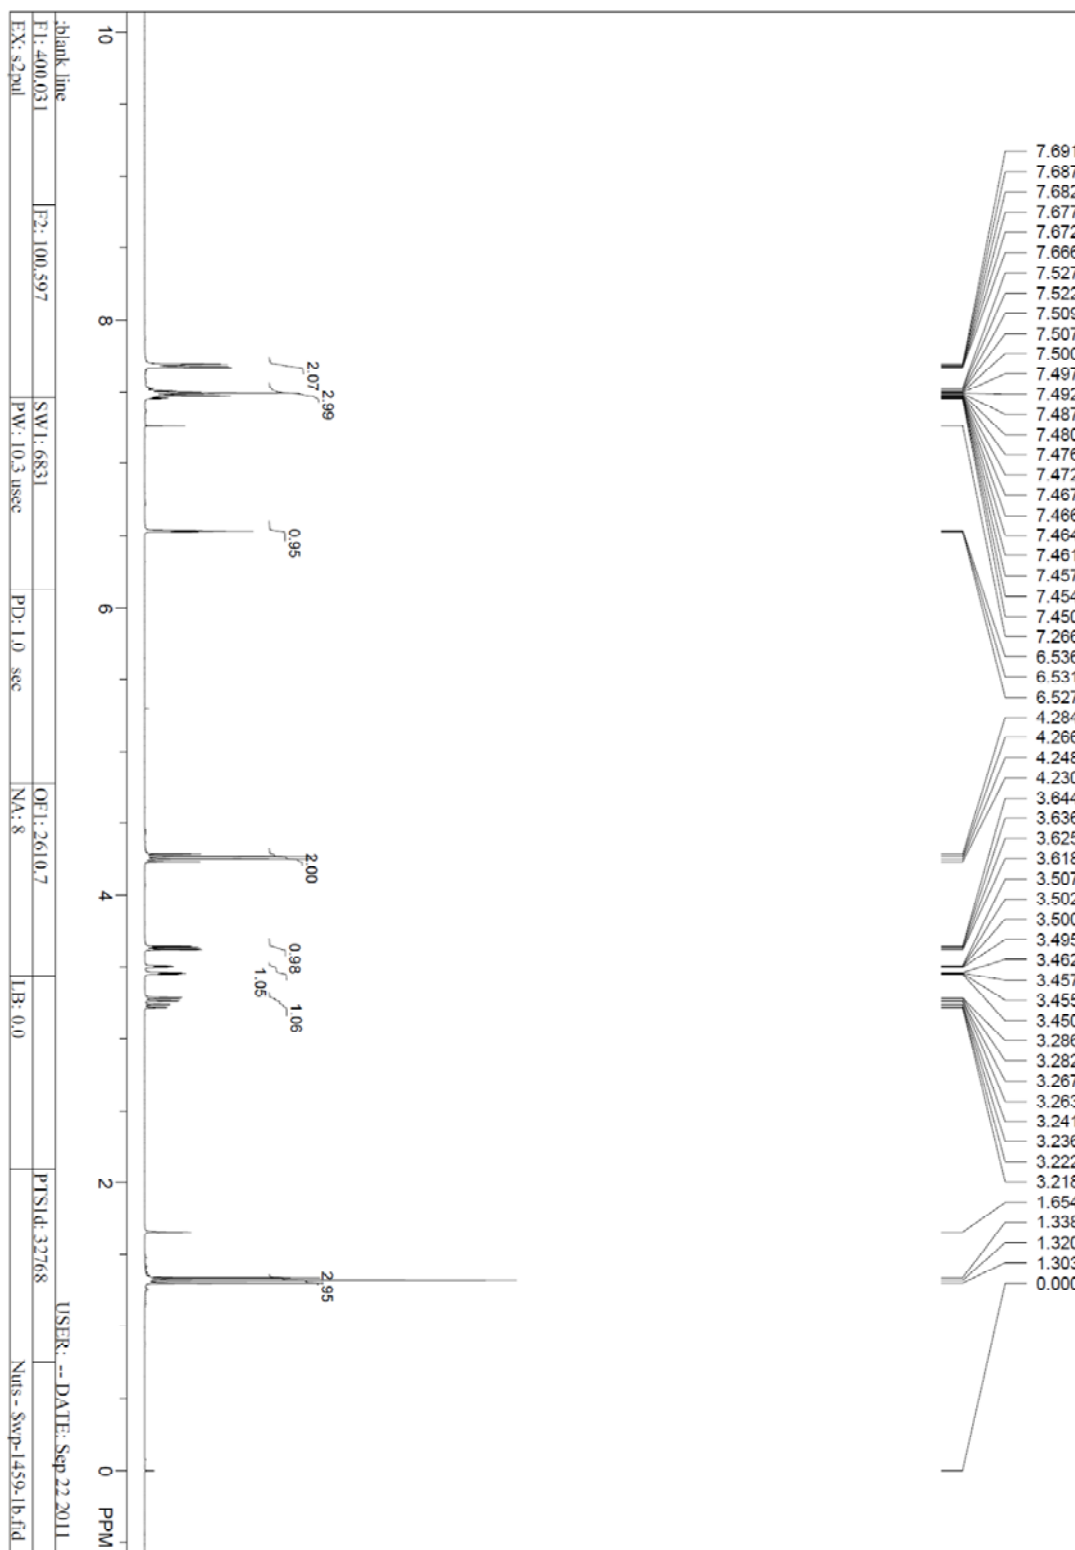

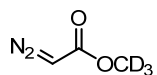

$d_3$ -MDA

$^1\text{H}$  NMR (400 M Hz in  $\text{CDCl}_3$ )

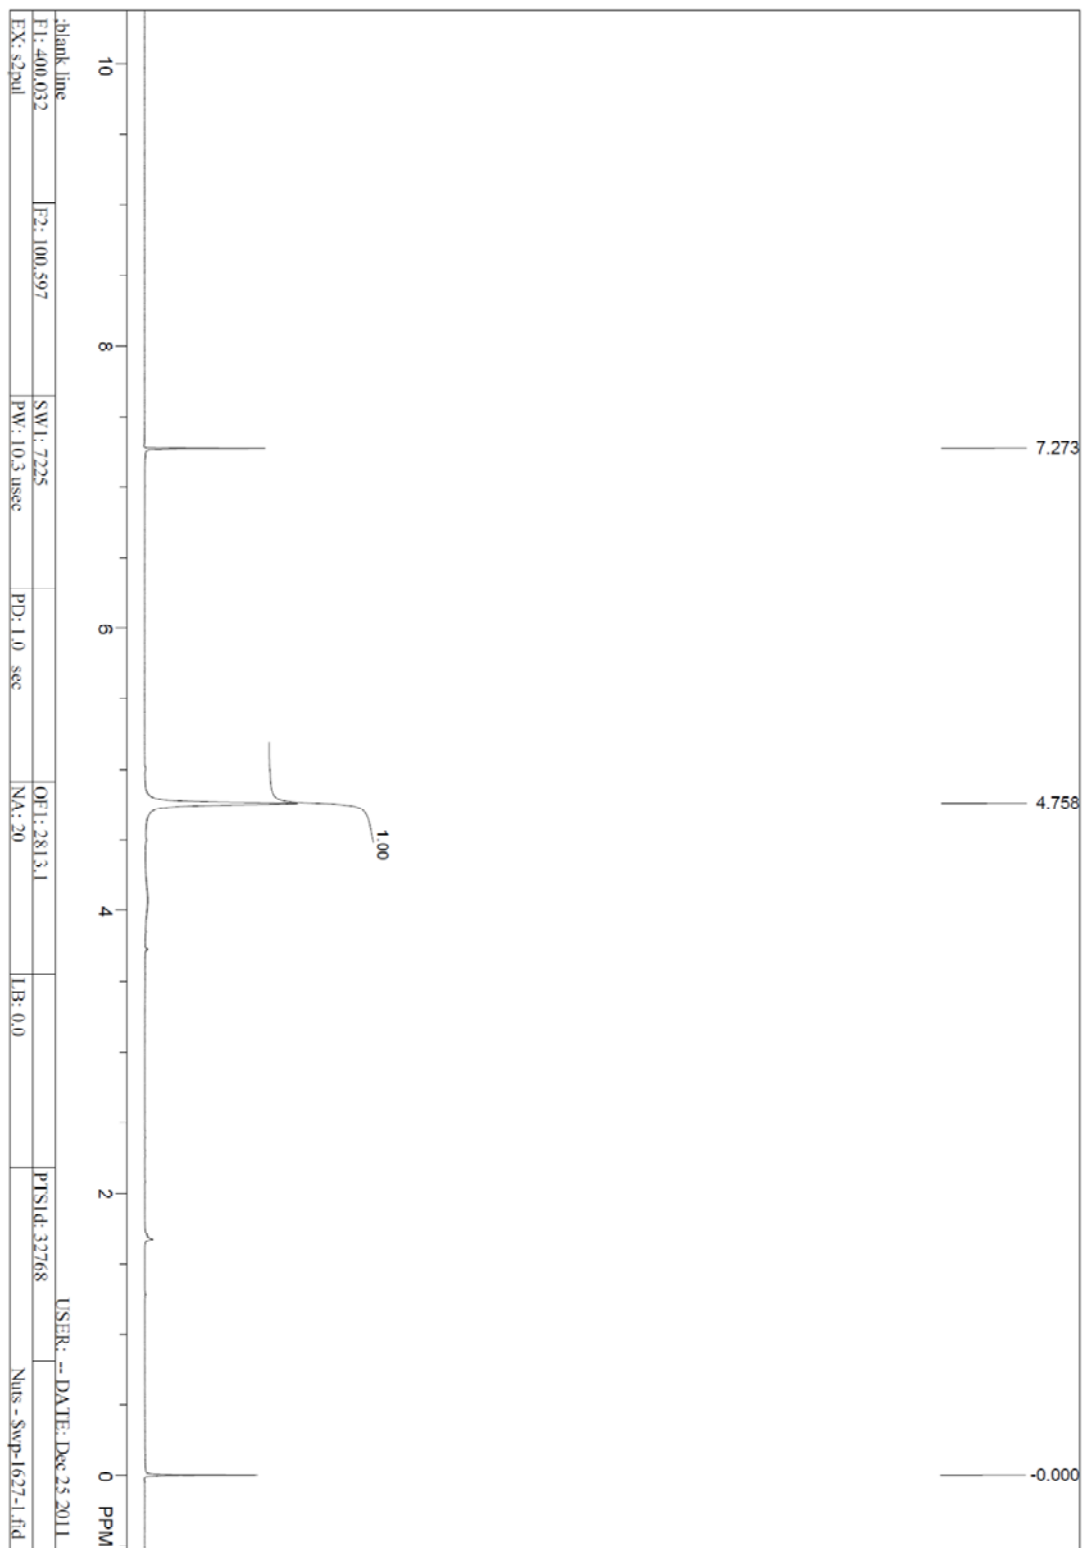

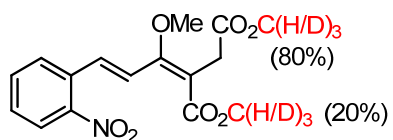

4c

<sup>1</sup>H NMR (300 M Hz in CDCl<sub>3</sub>)

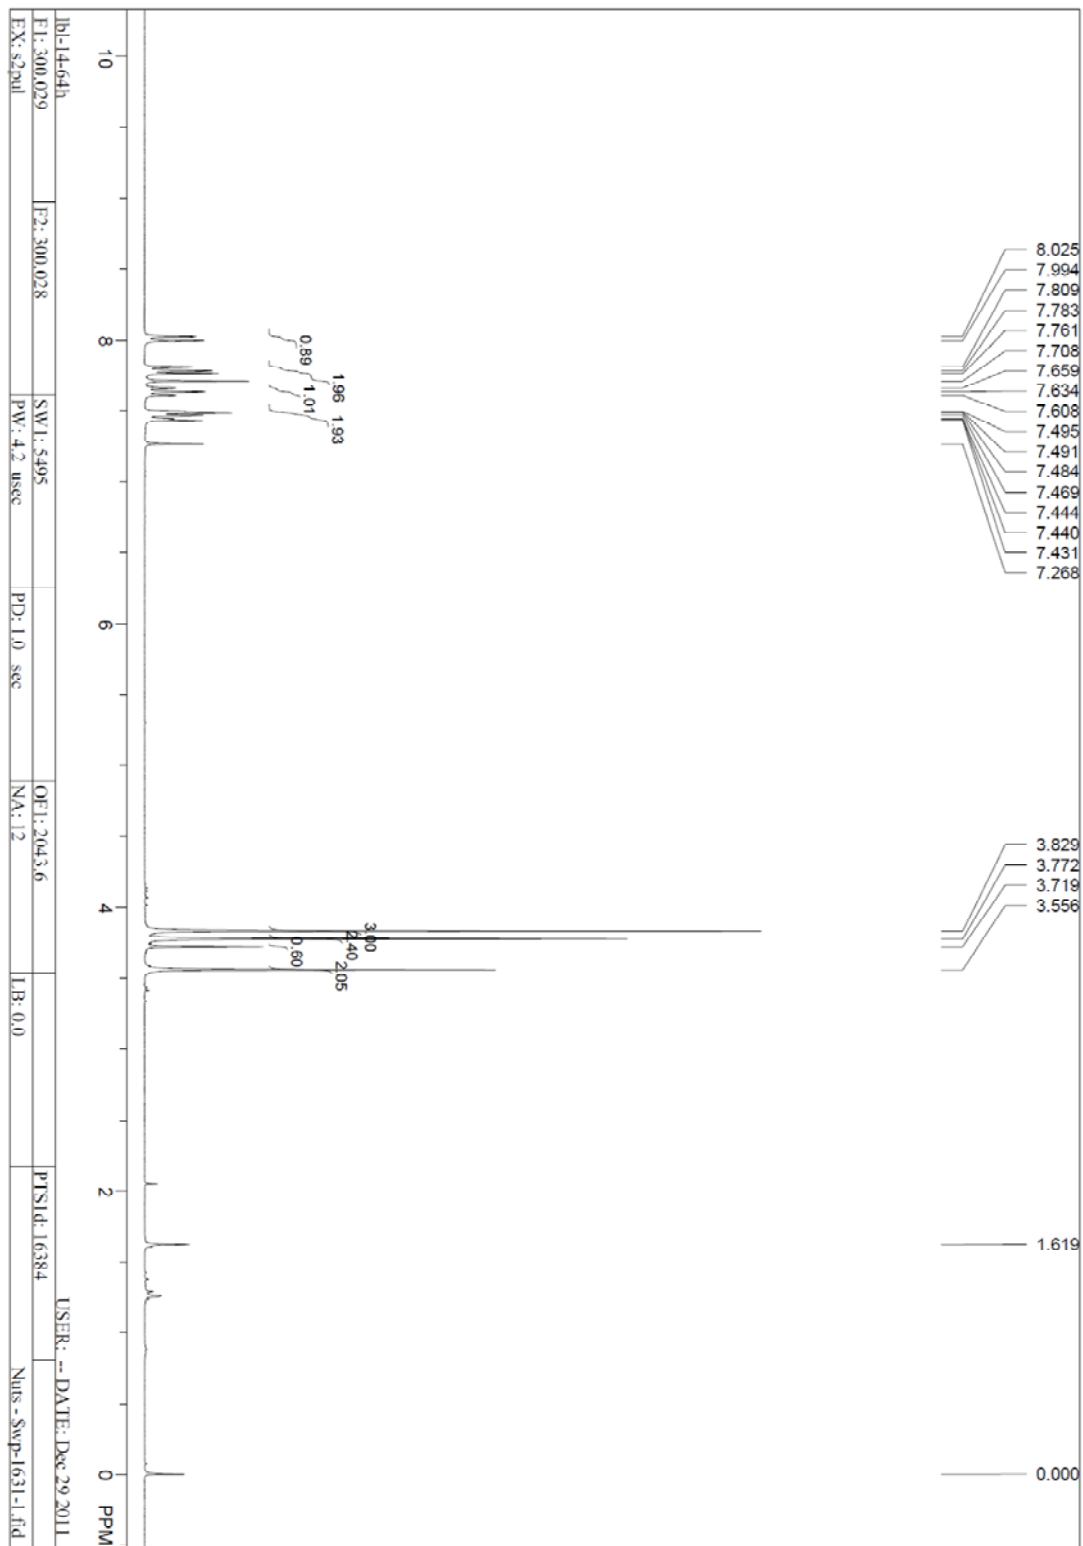

Supplement: c3cc44092c.pdf [file c3cc44092c.pdf]
